# Supplementary material
Source: PubMed Central journal article supplement (PMC2585166)

chromosome I

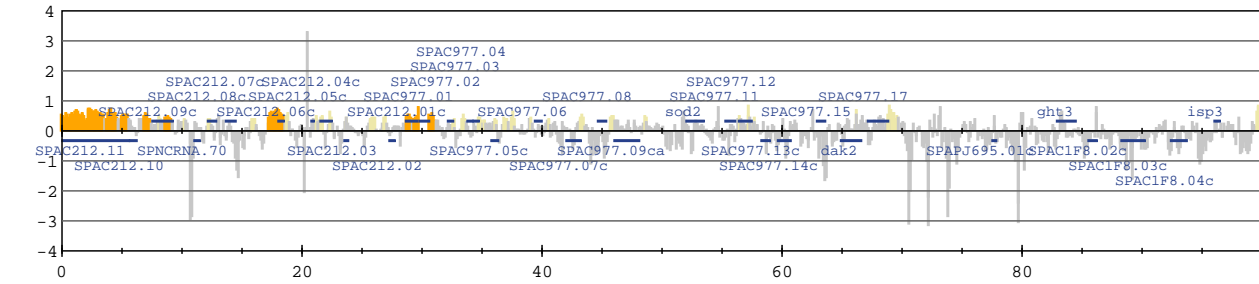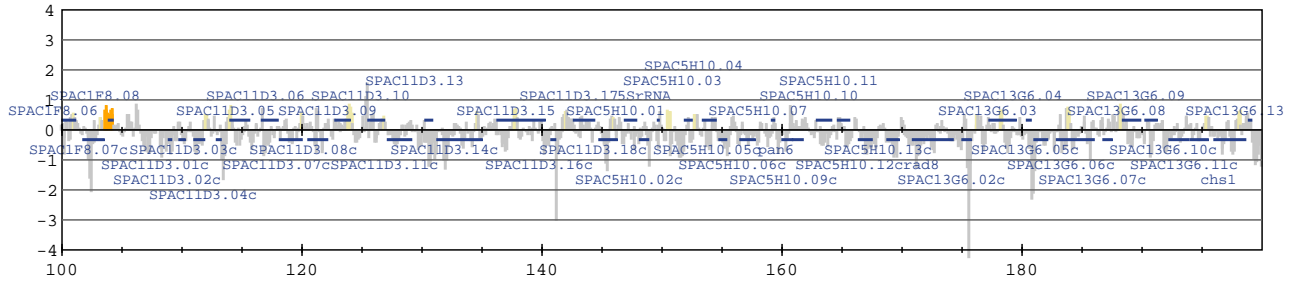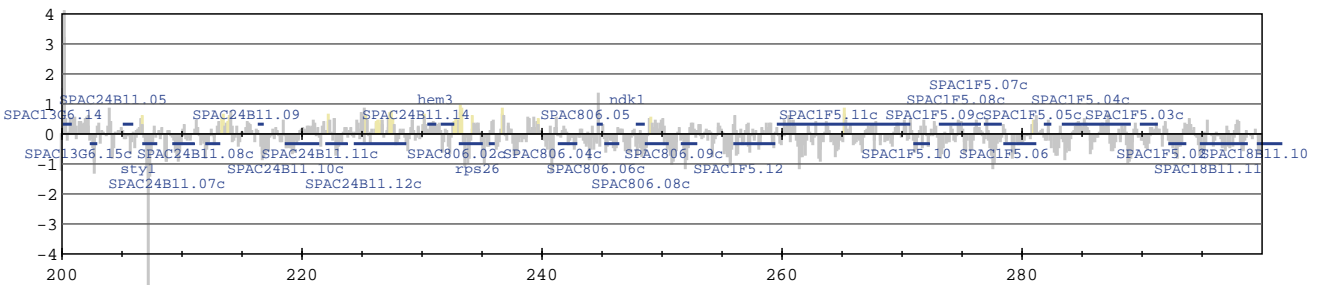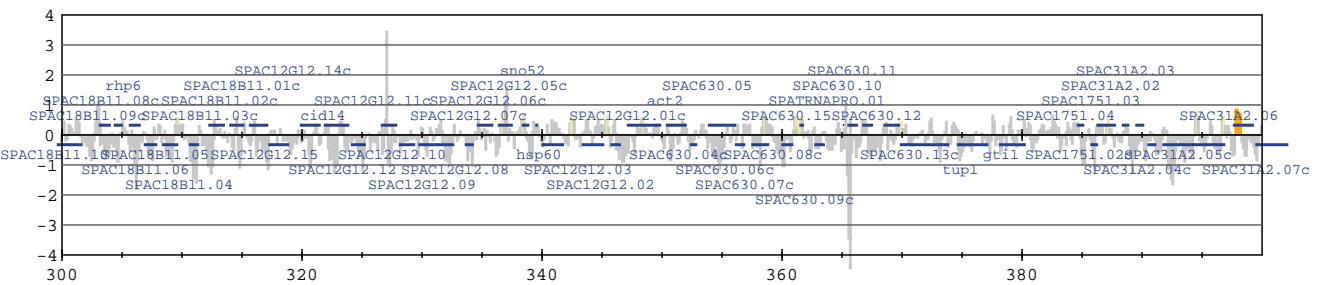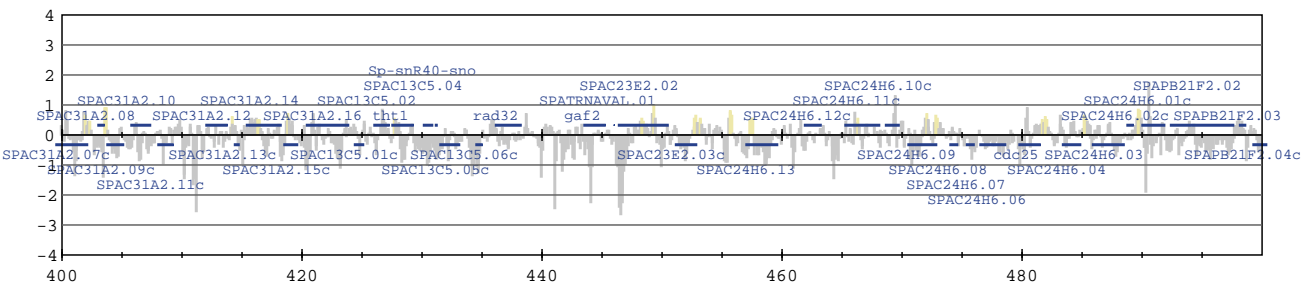



chromosome I

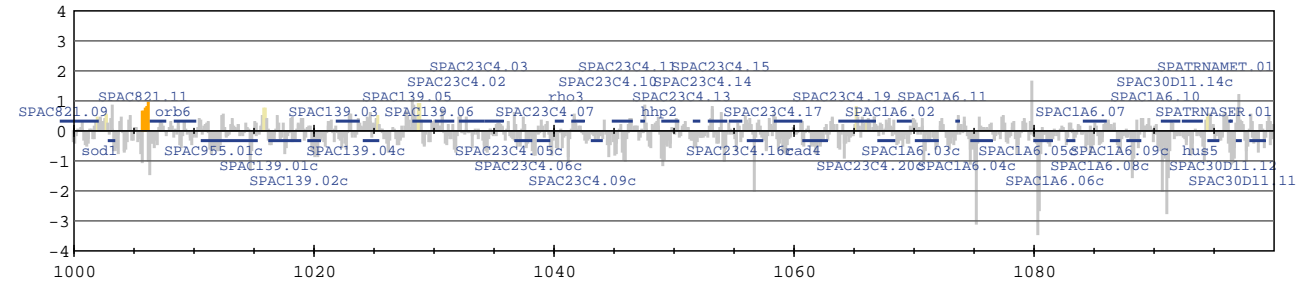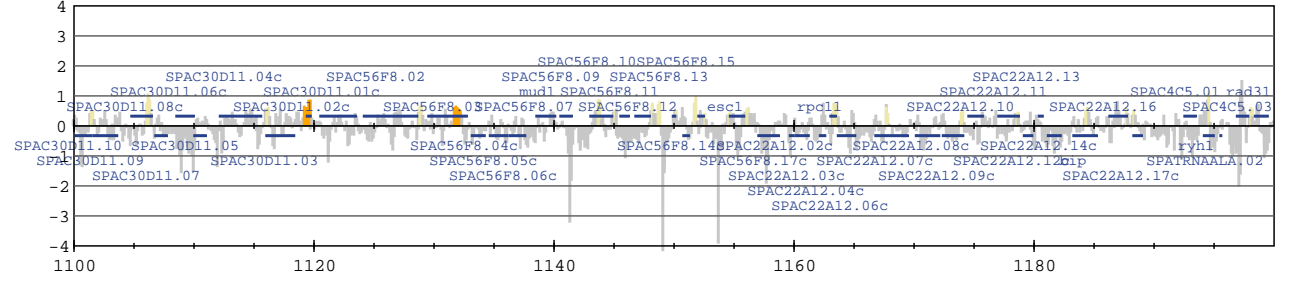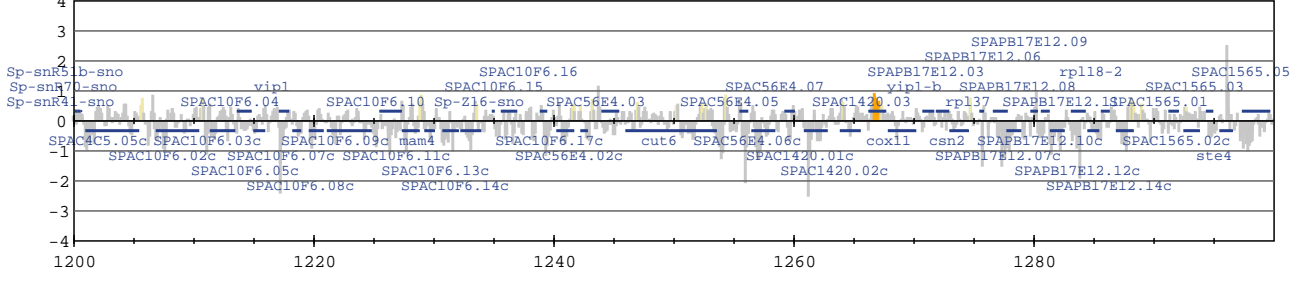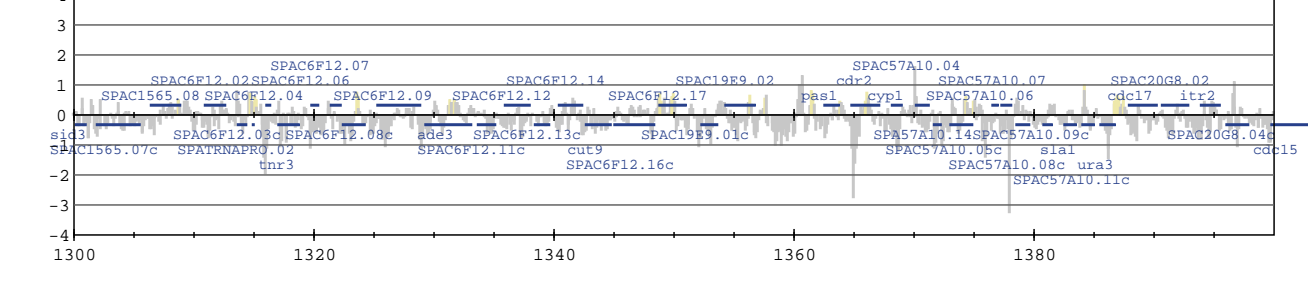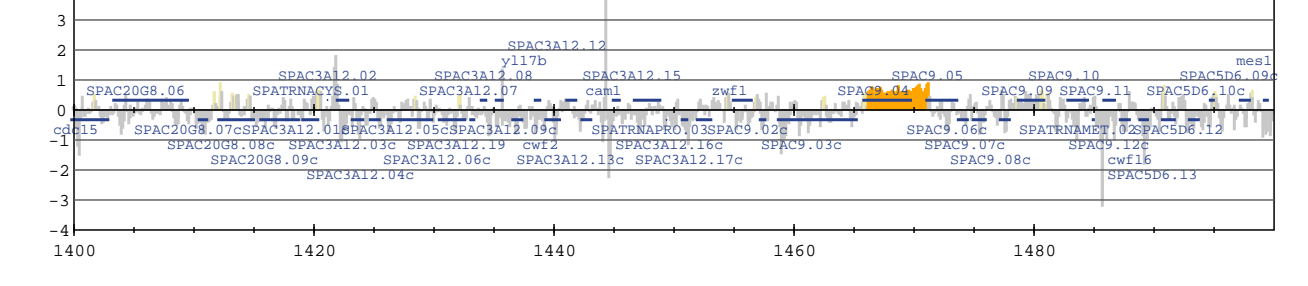

chromosome I

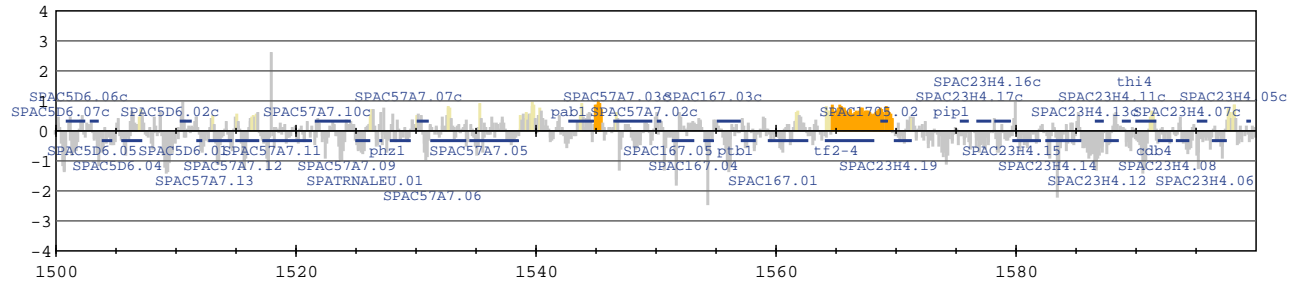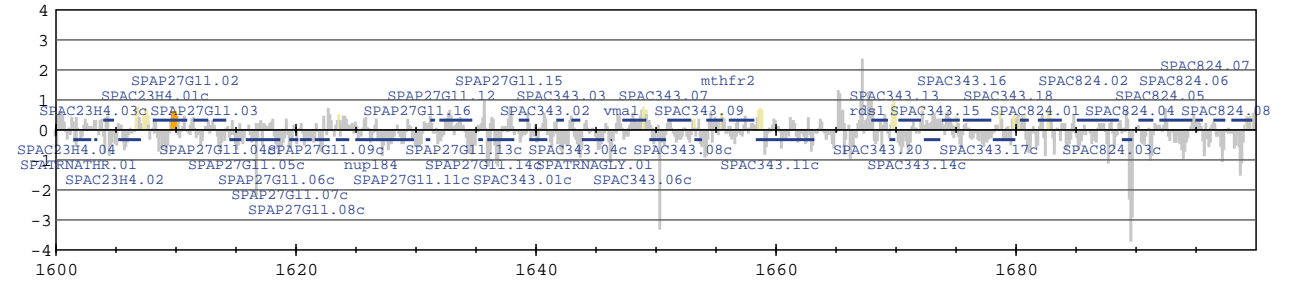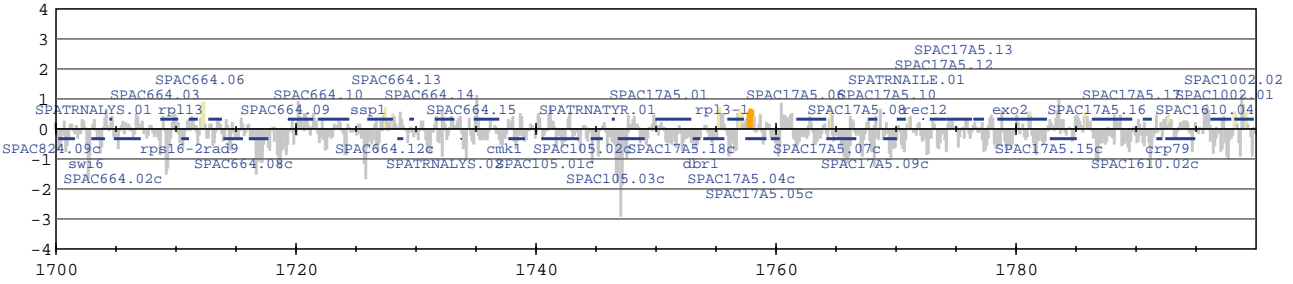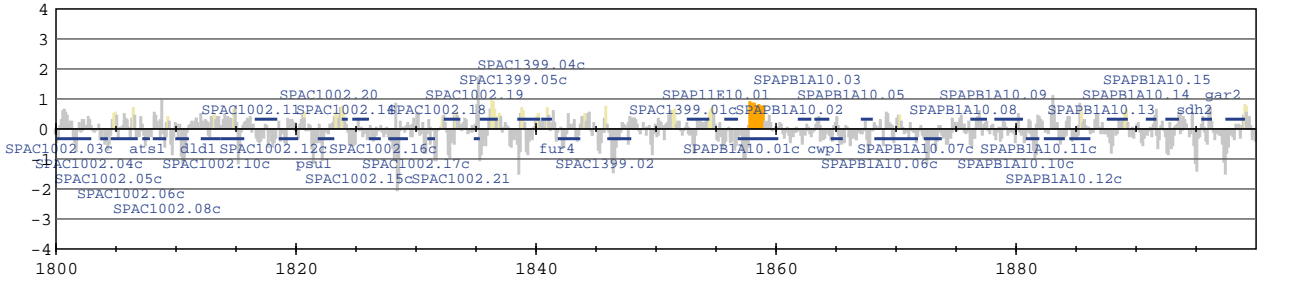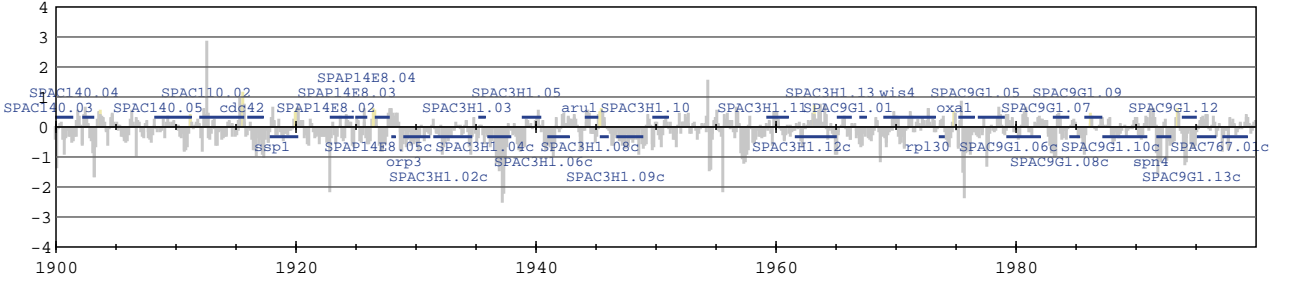

chromosome I

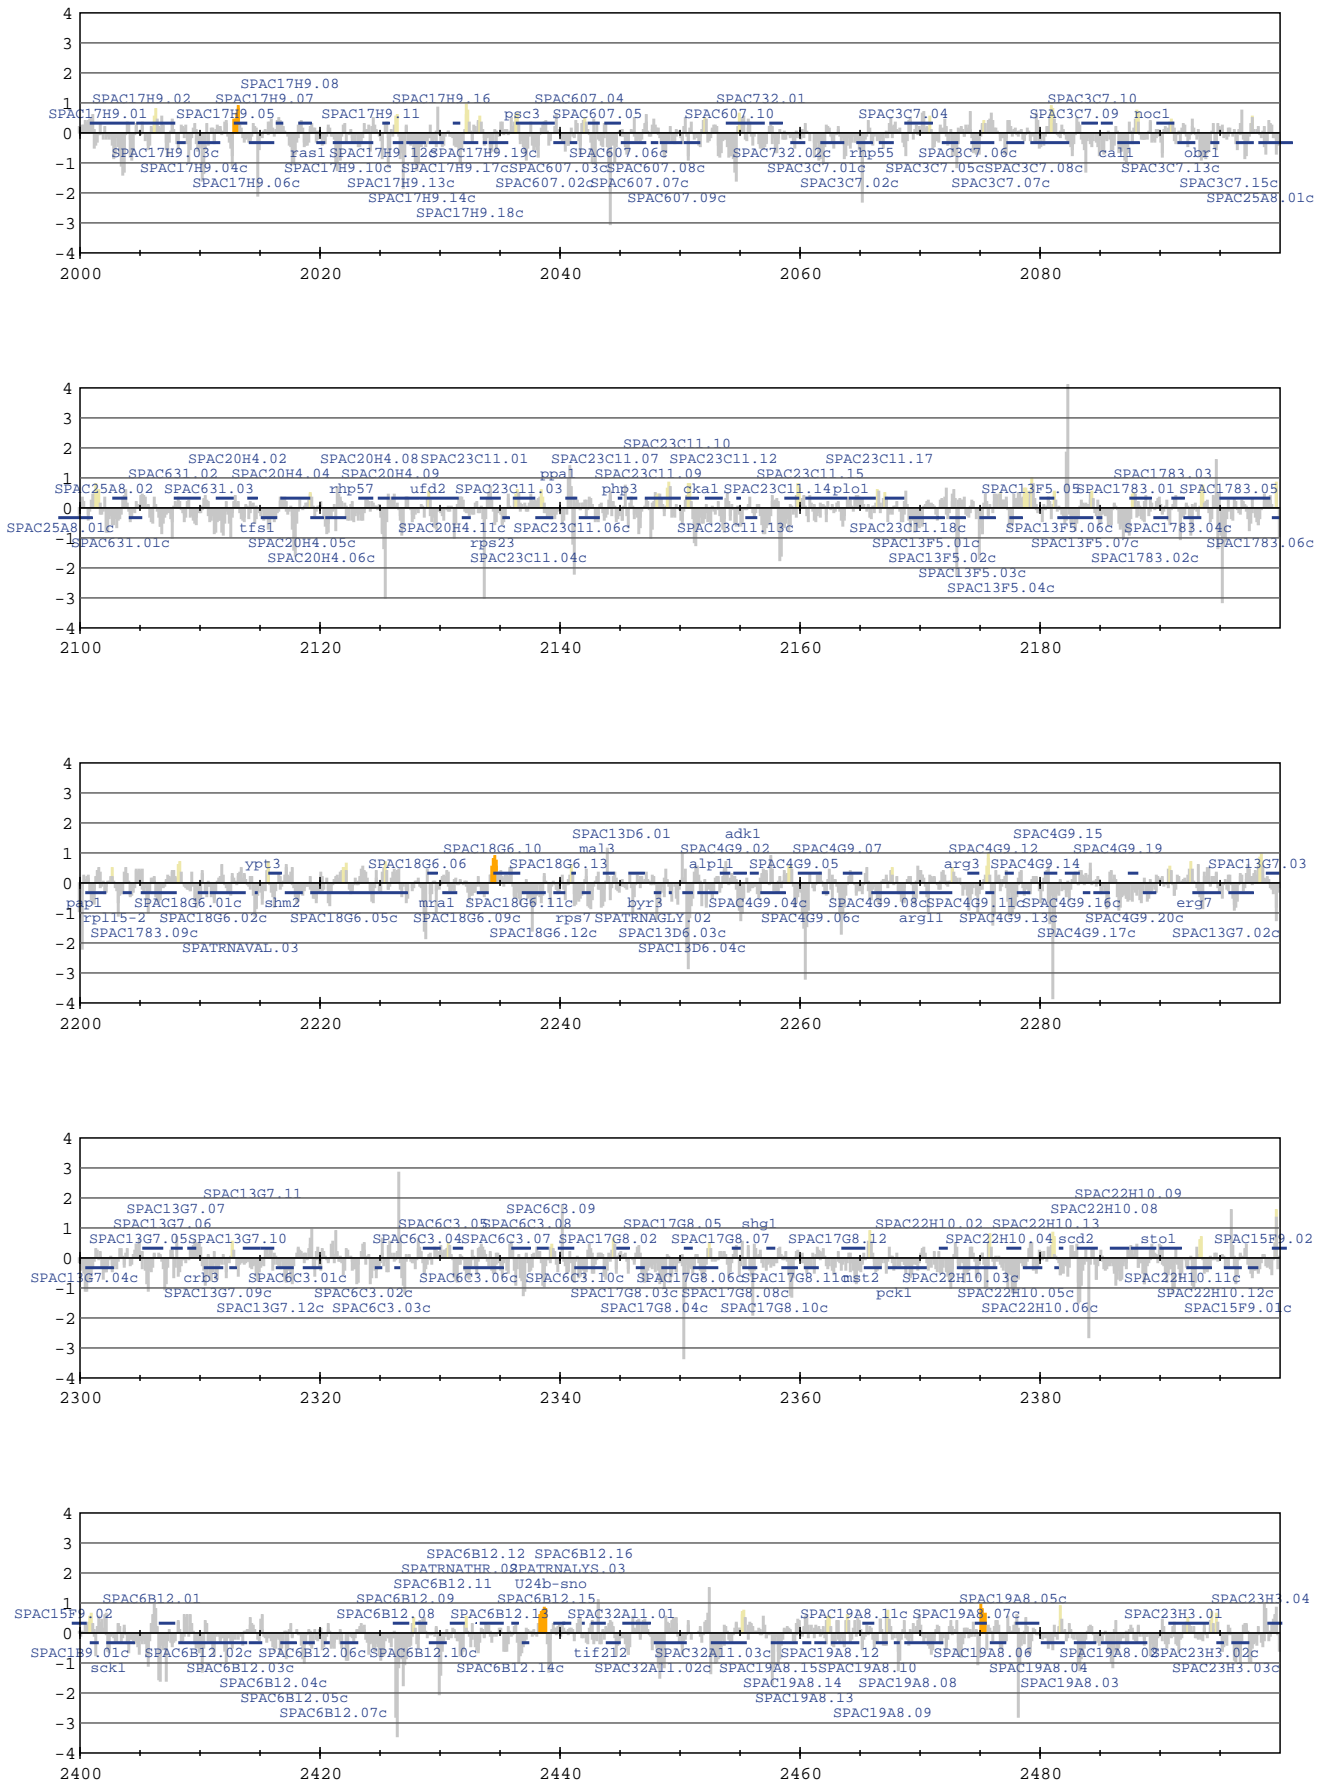

chromosome I

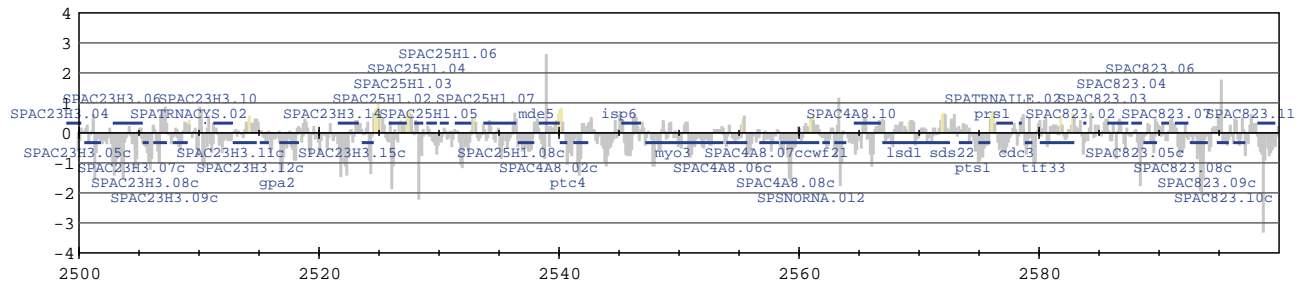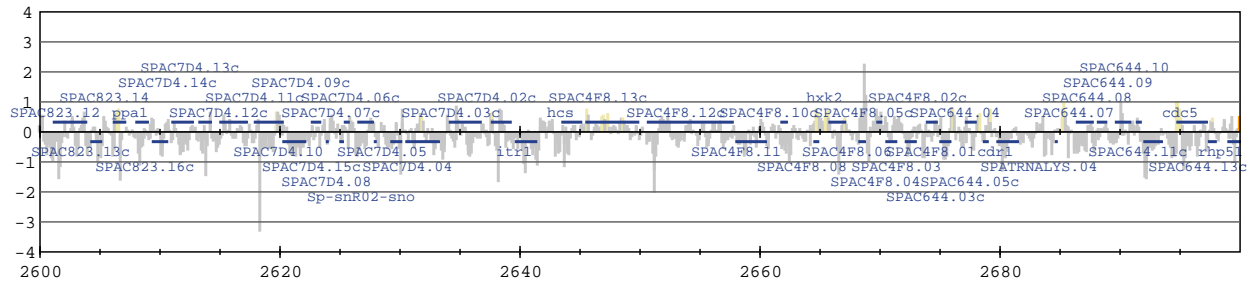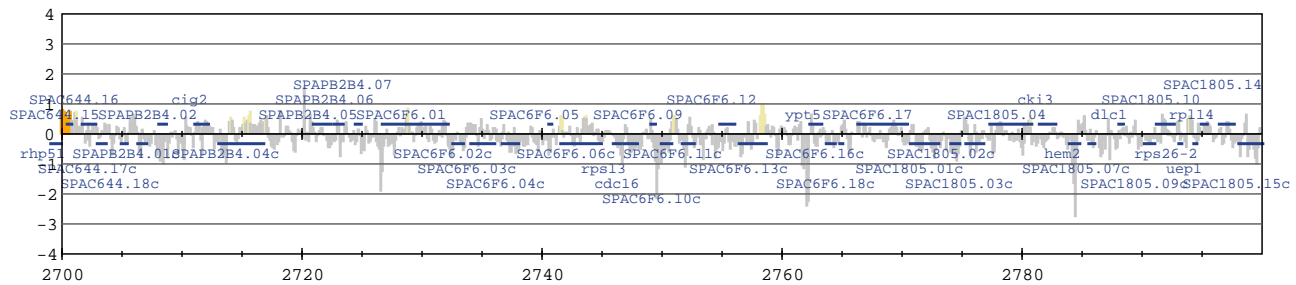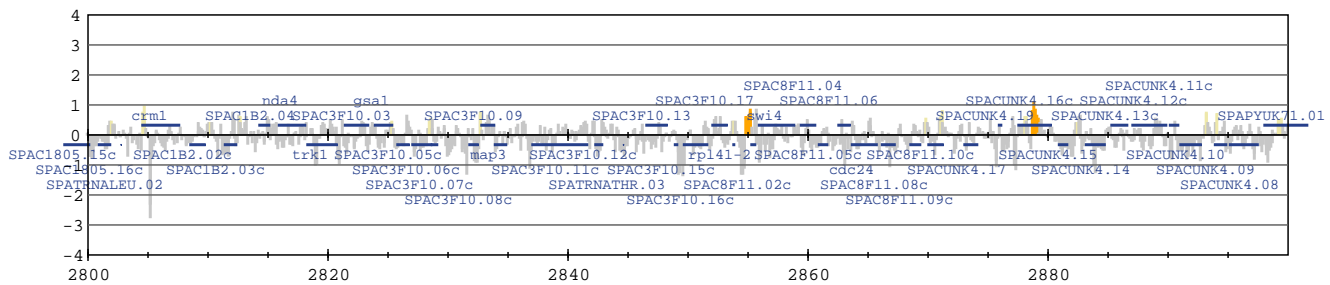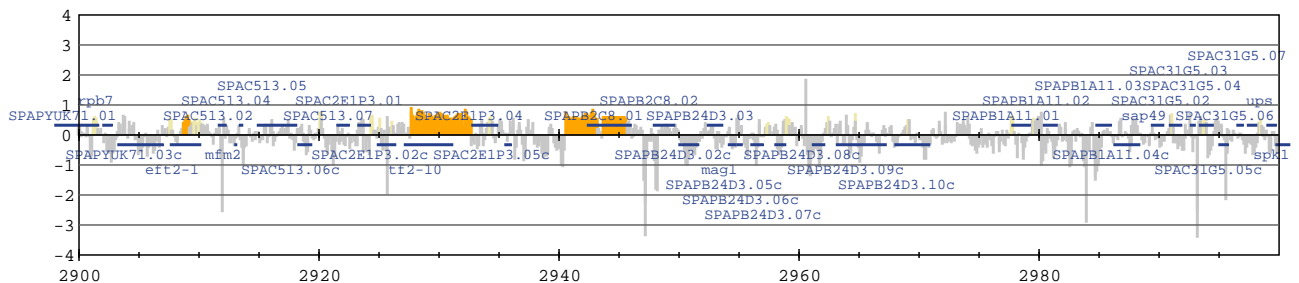

chromosome I

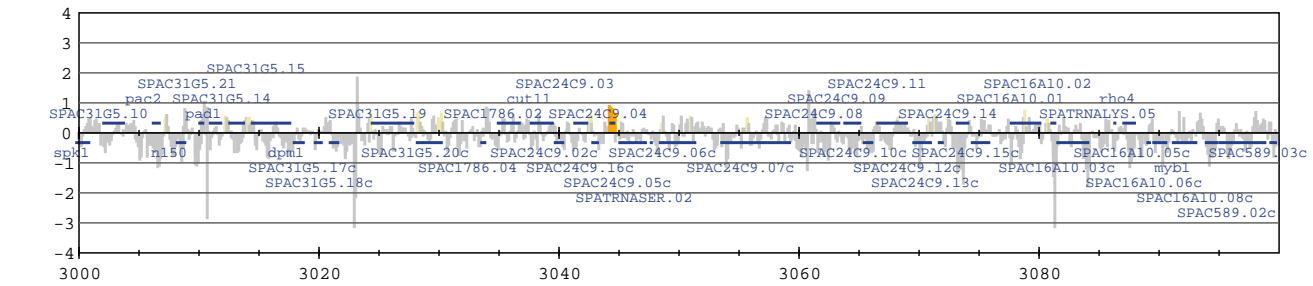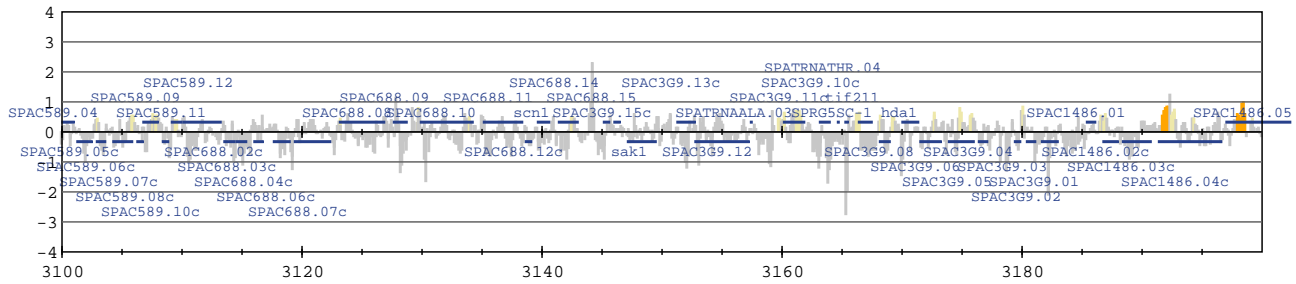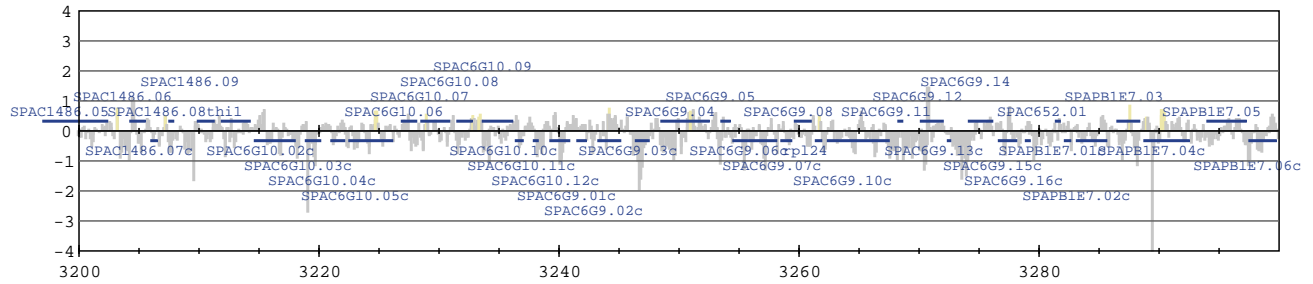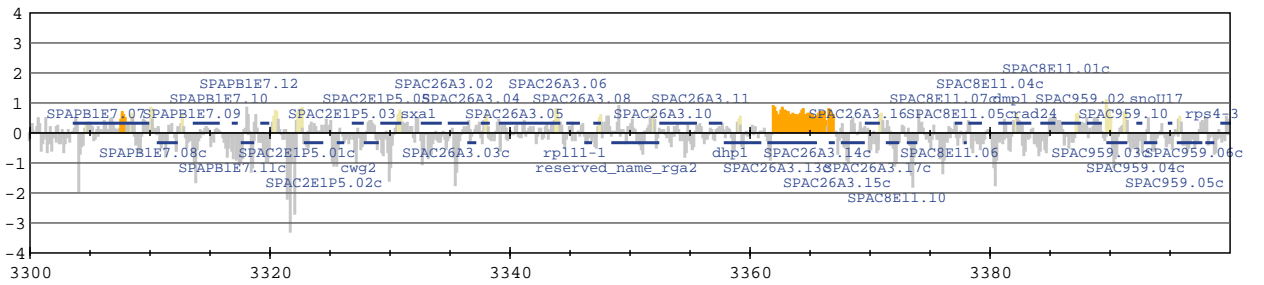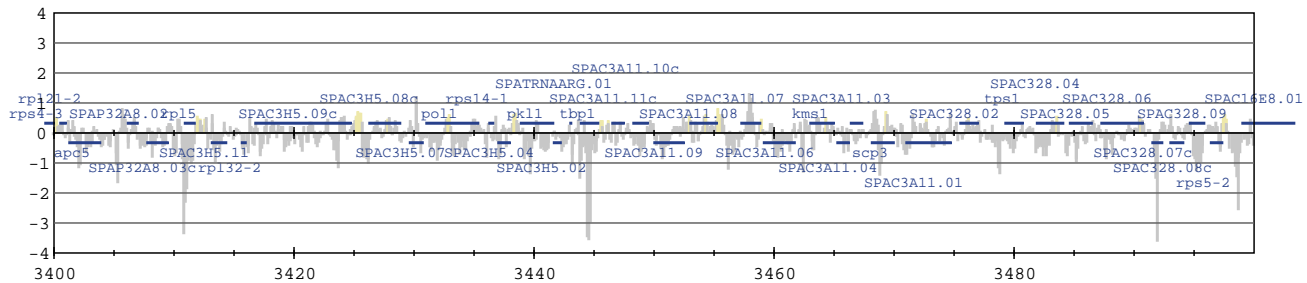





chromosome I

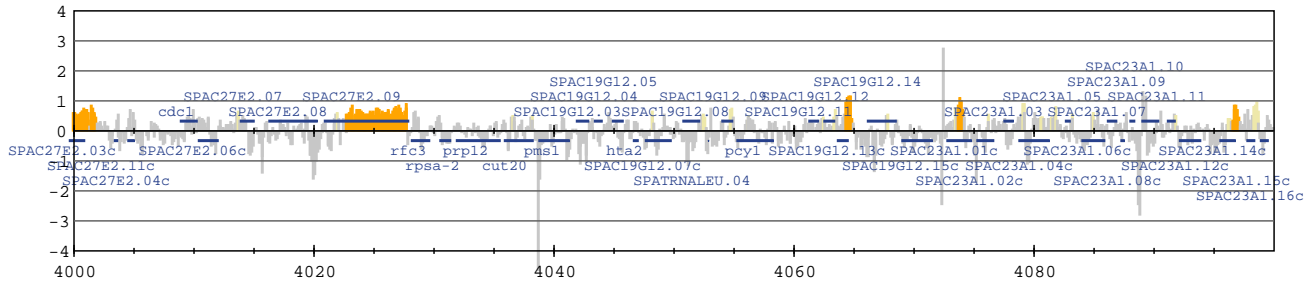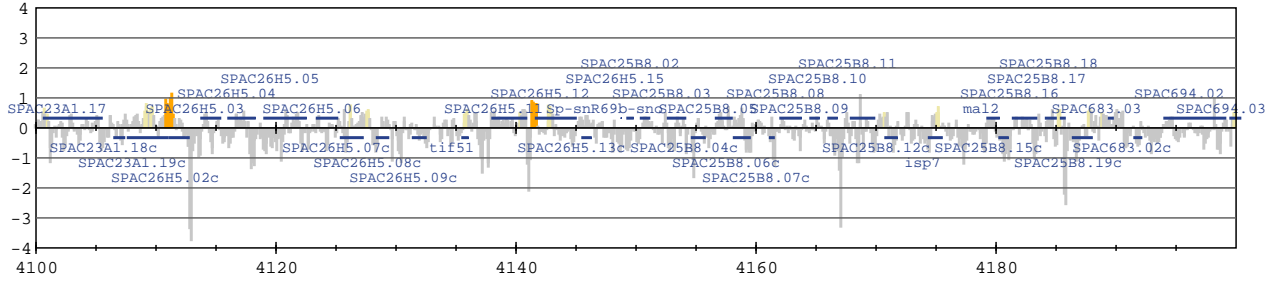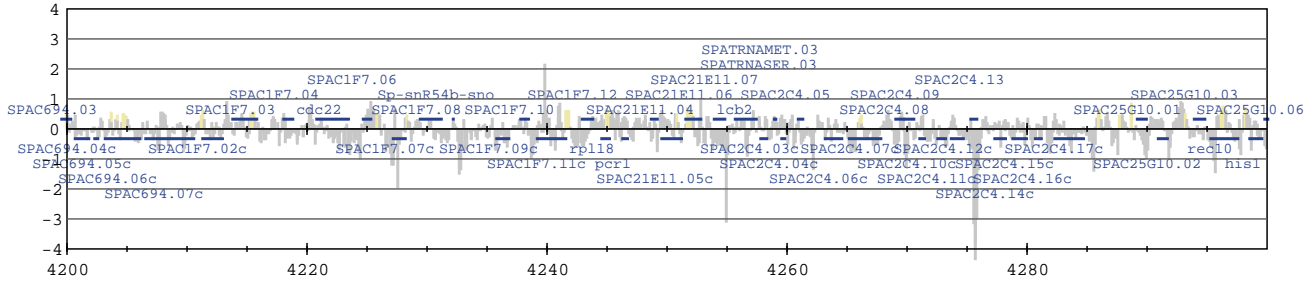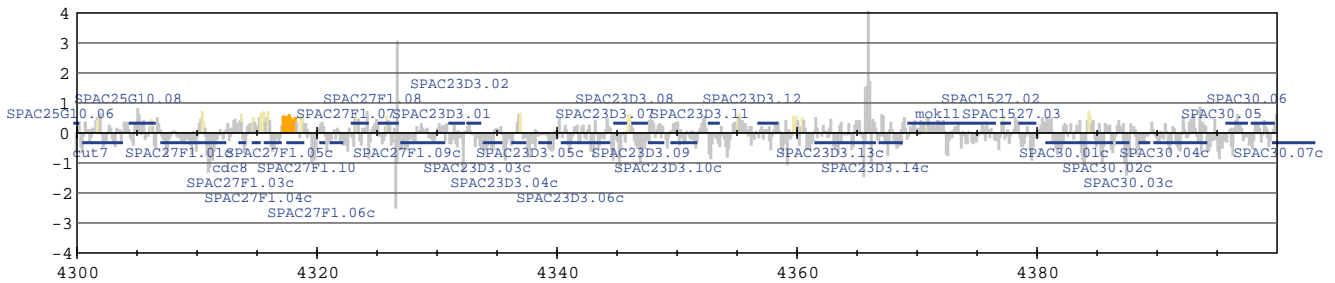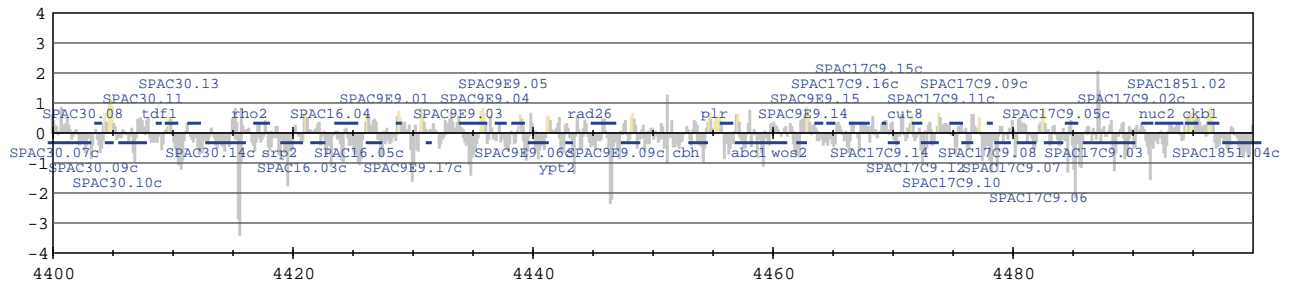

chromosome I

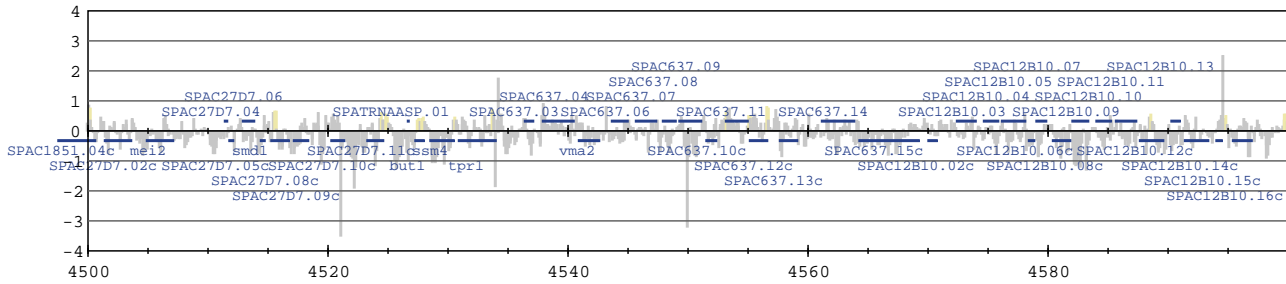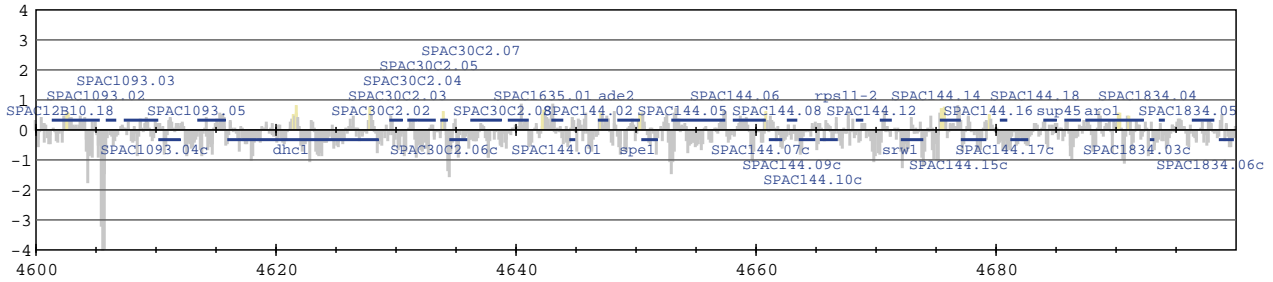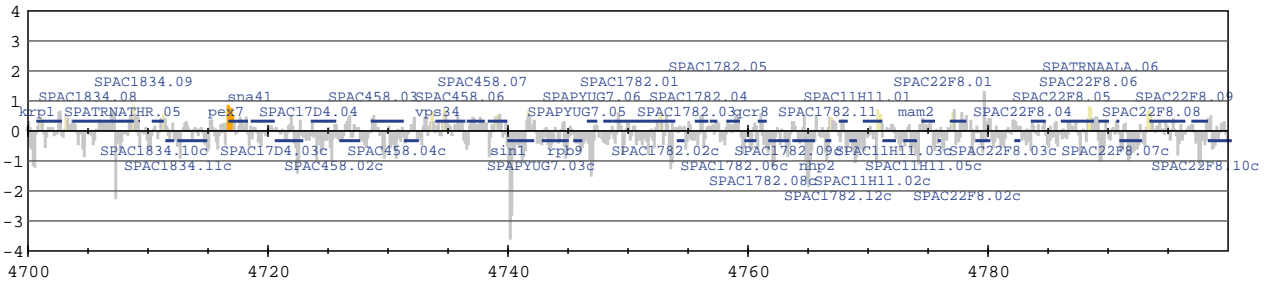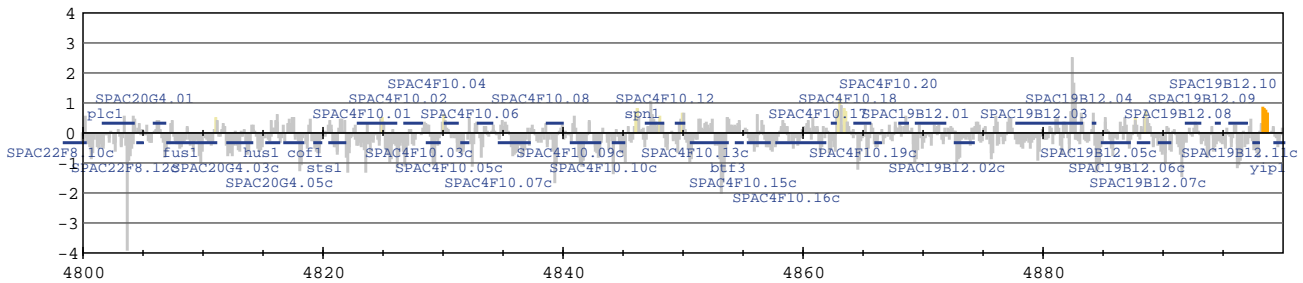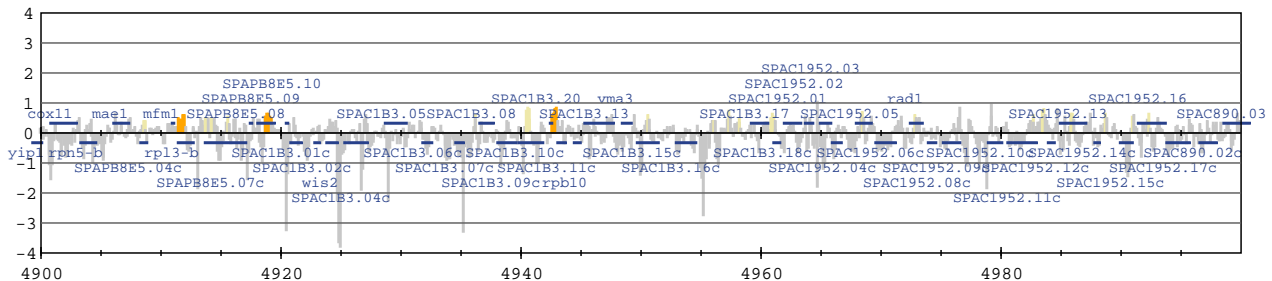

chromosome I

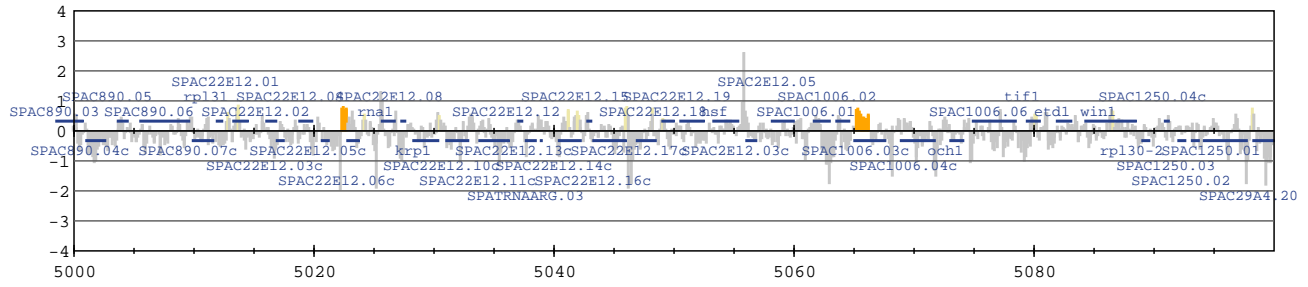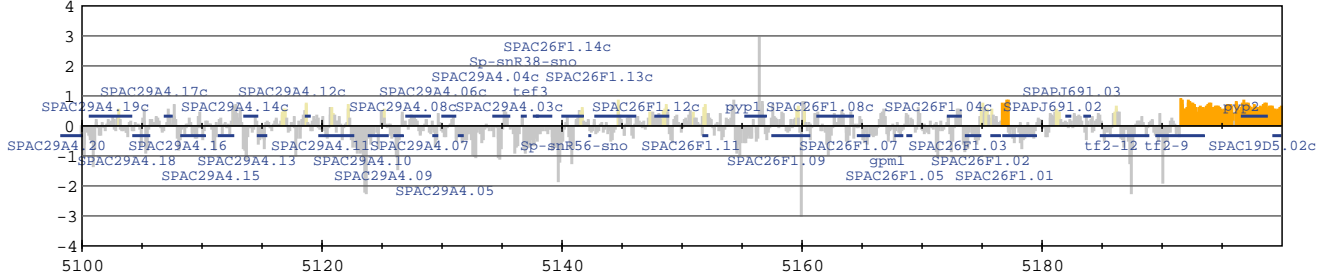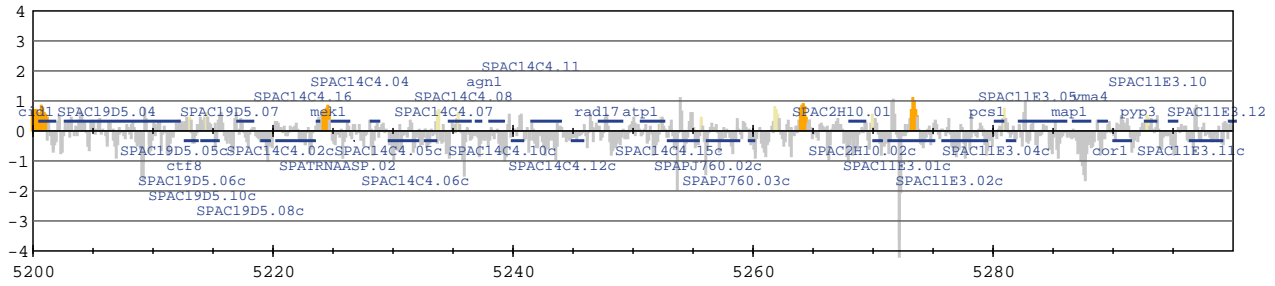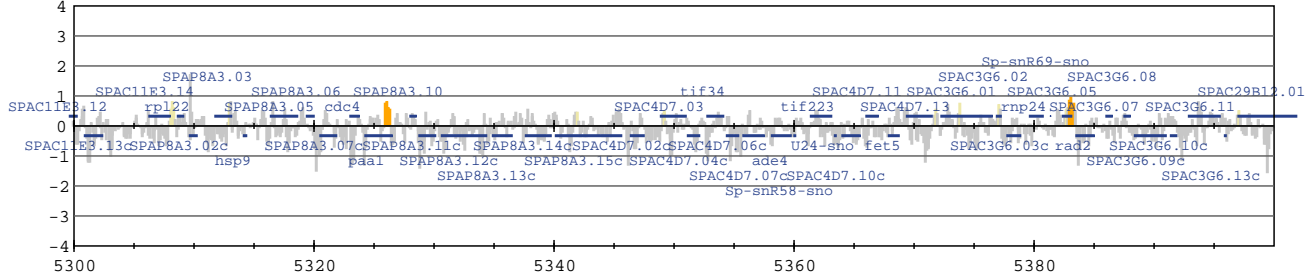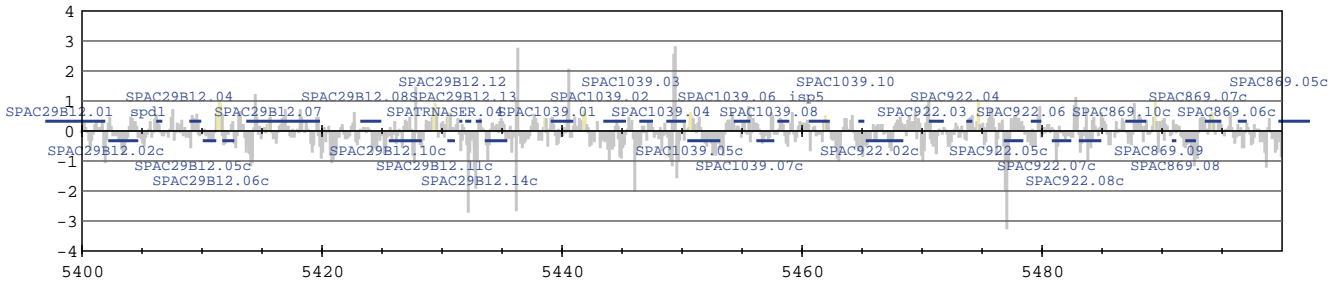

chromosome I

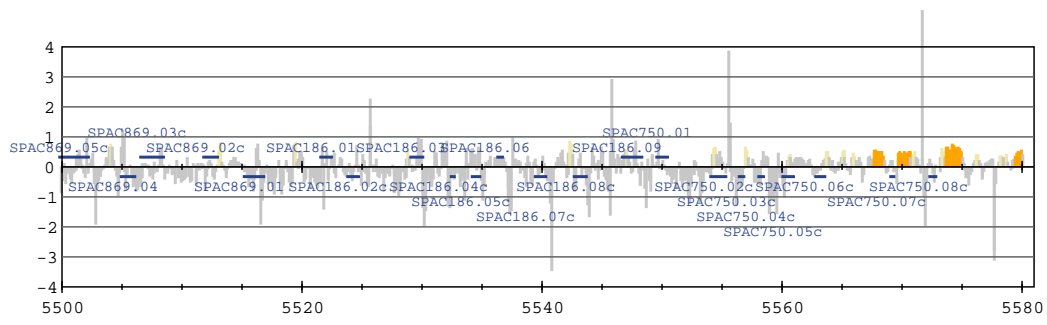

chromosome II

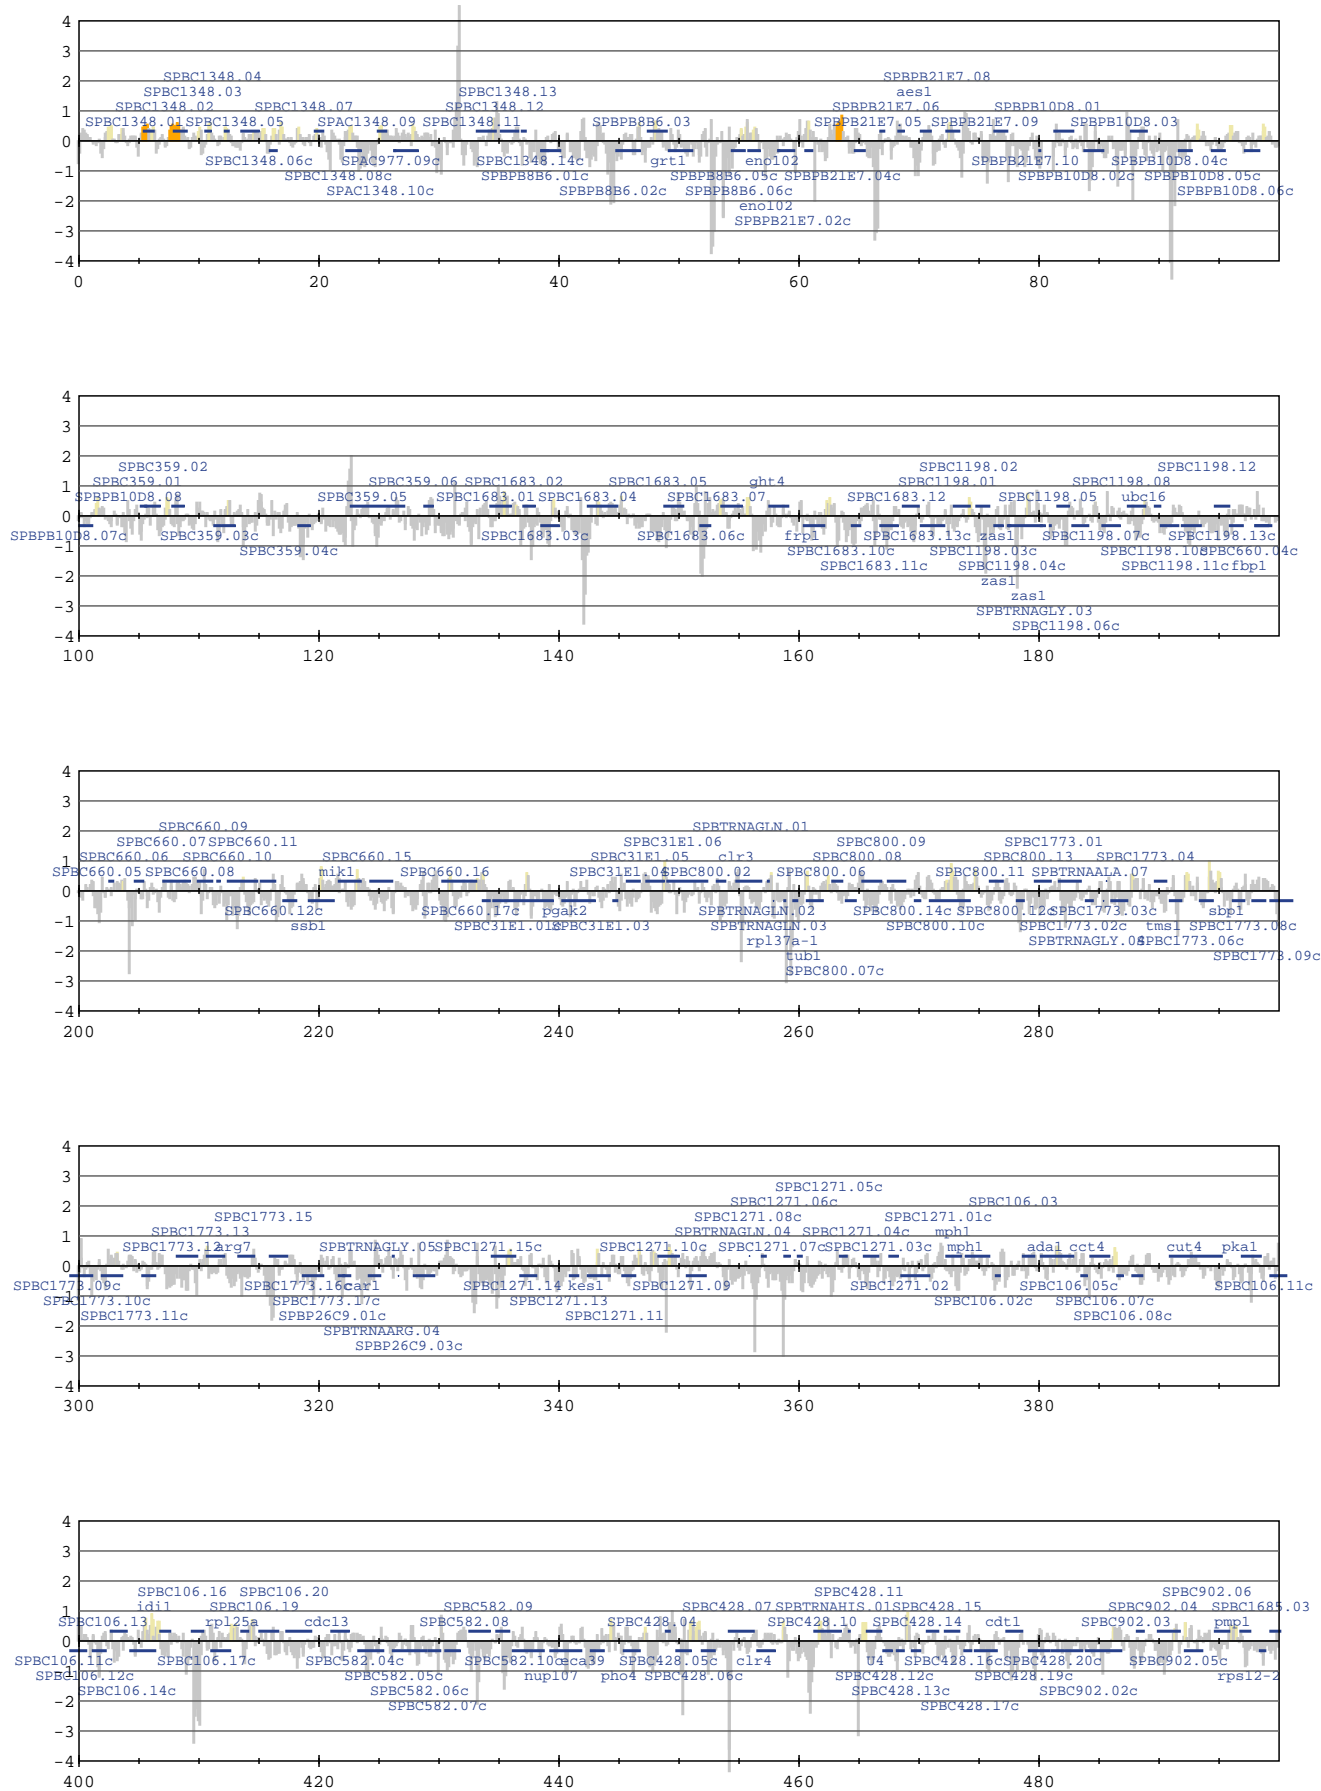

chromosome II

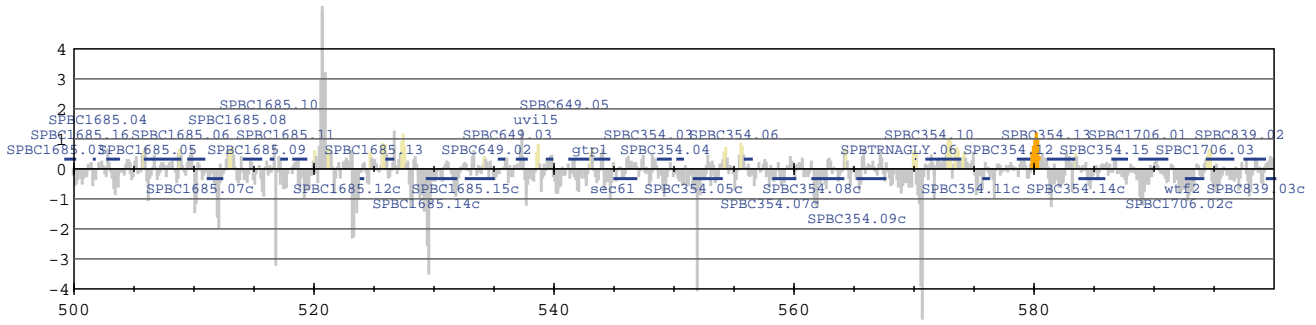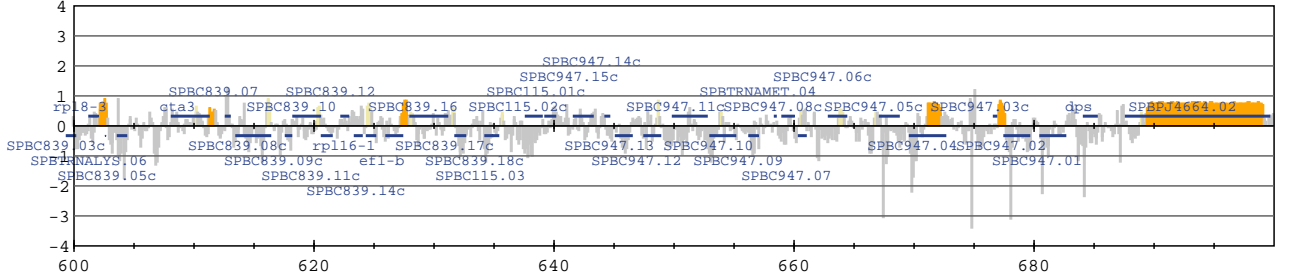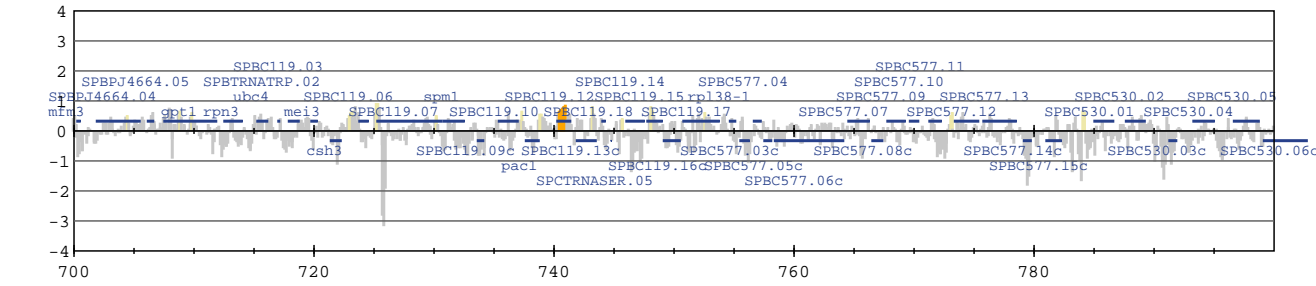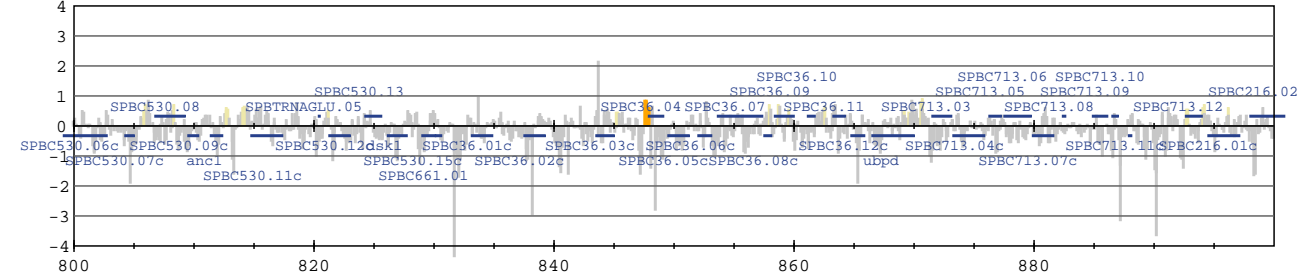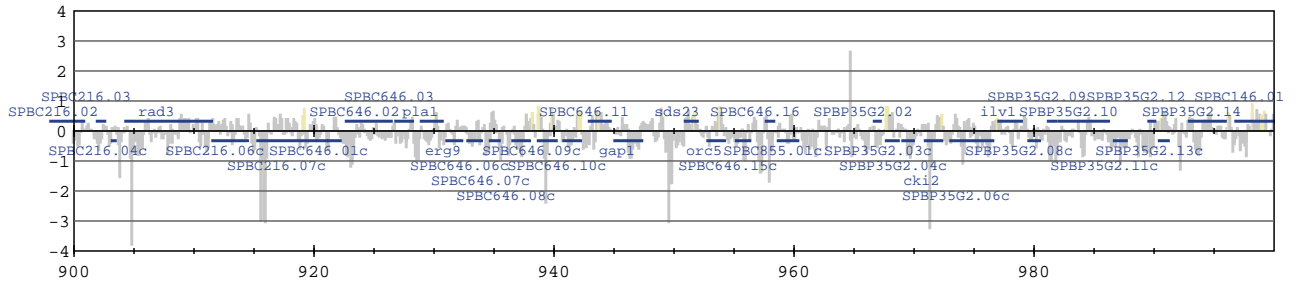

chromosome II

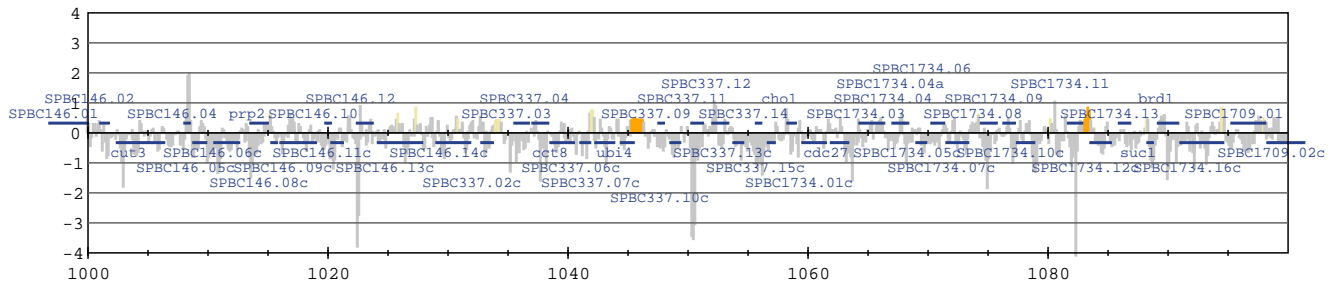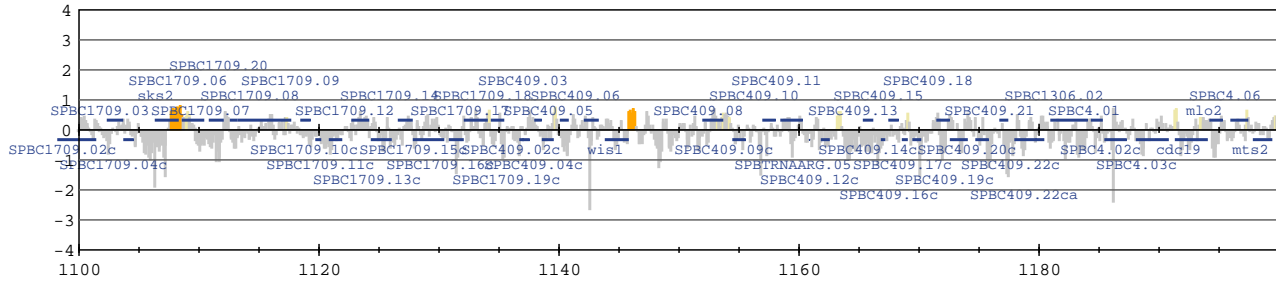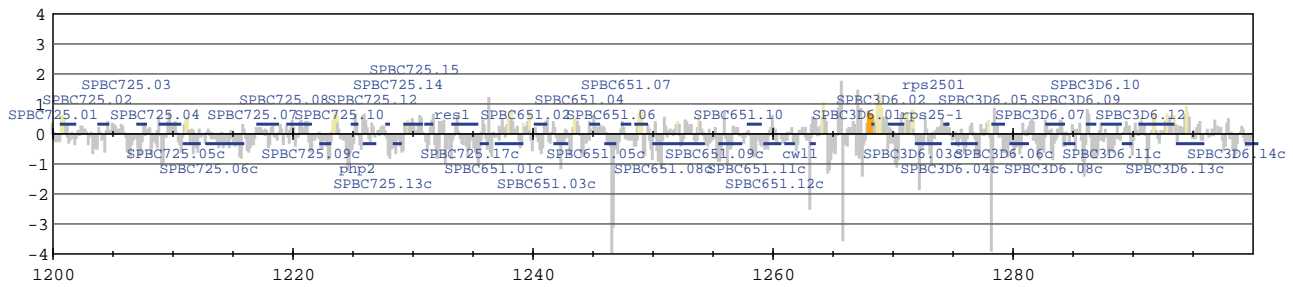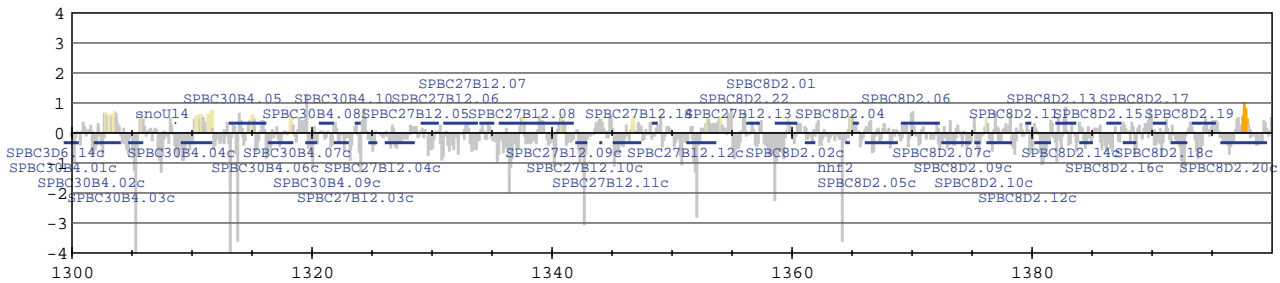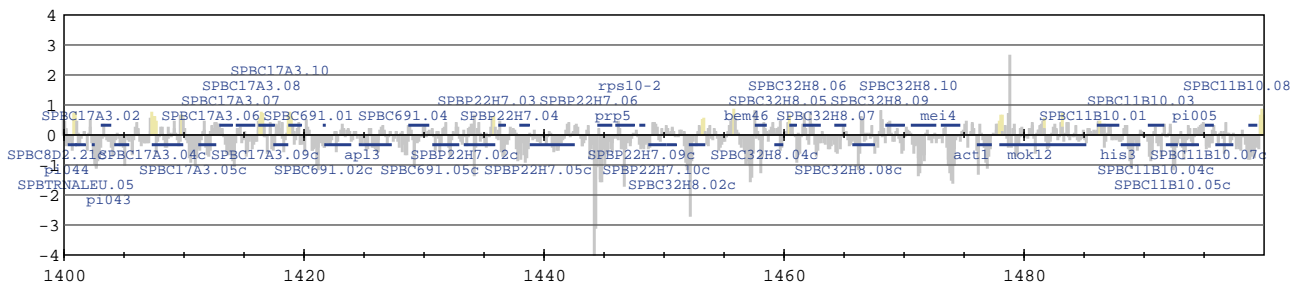

chromosome II

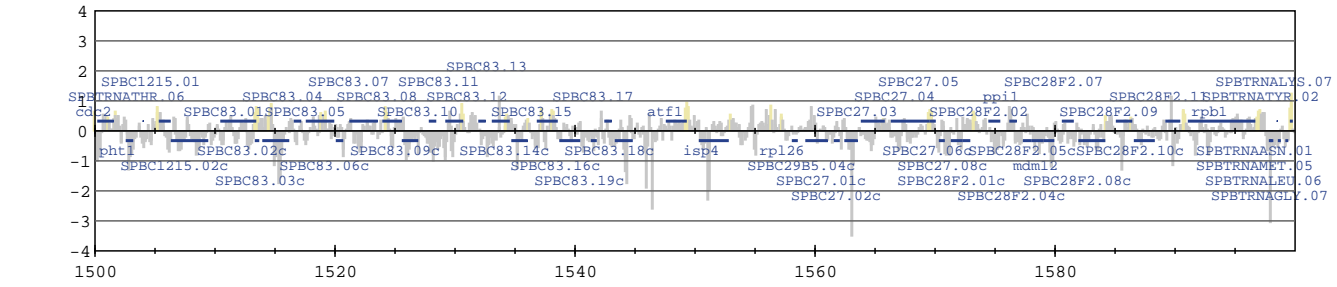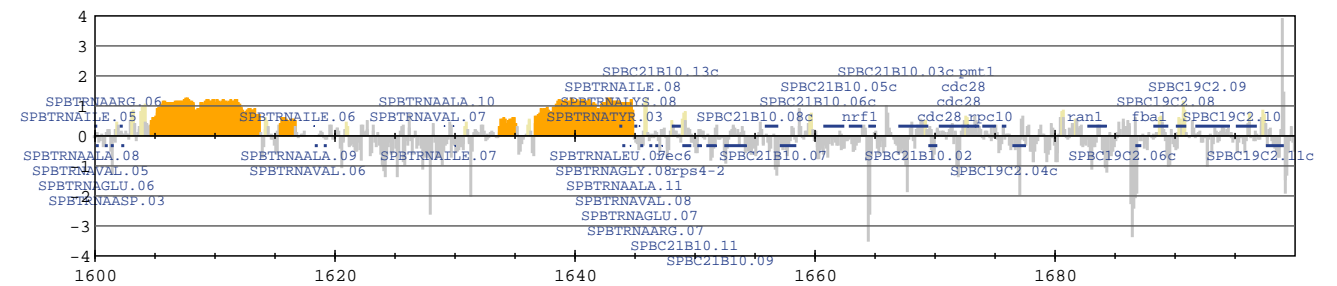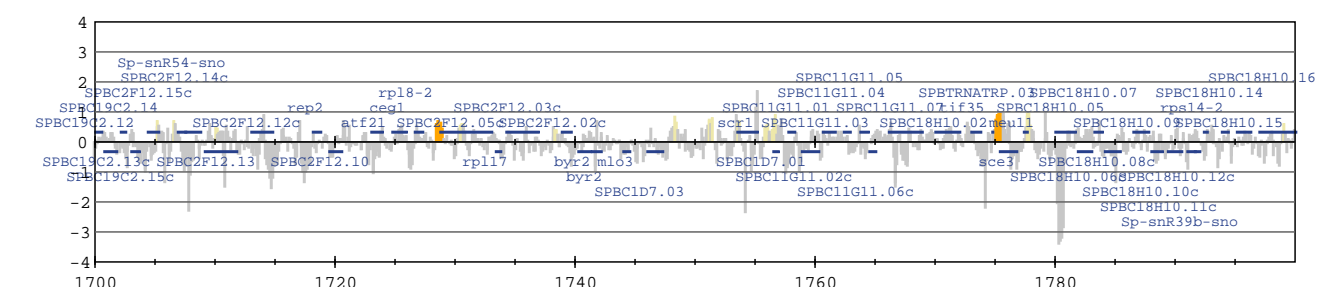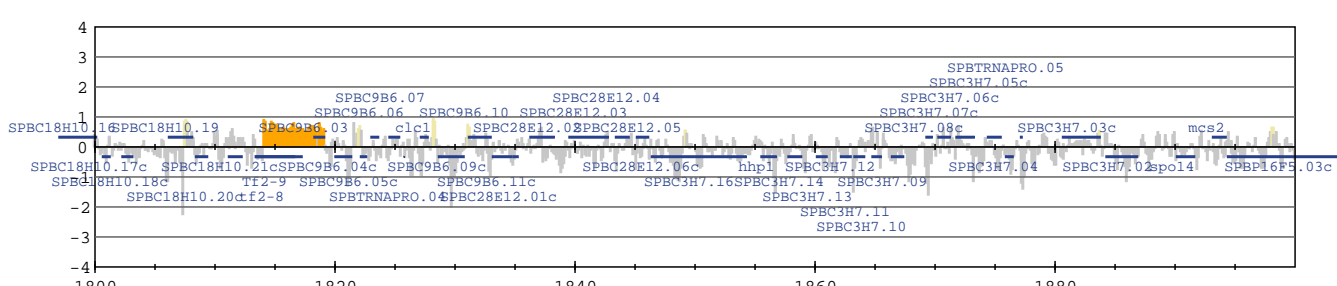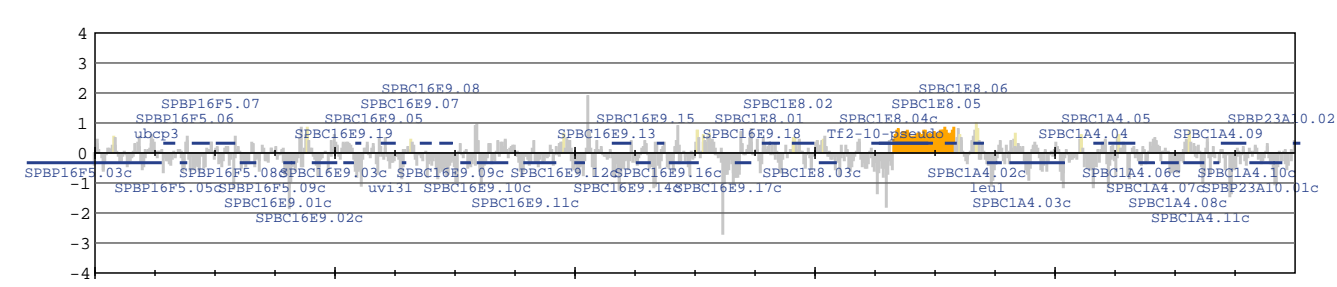





chromosome II

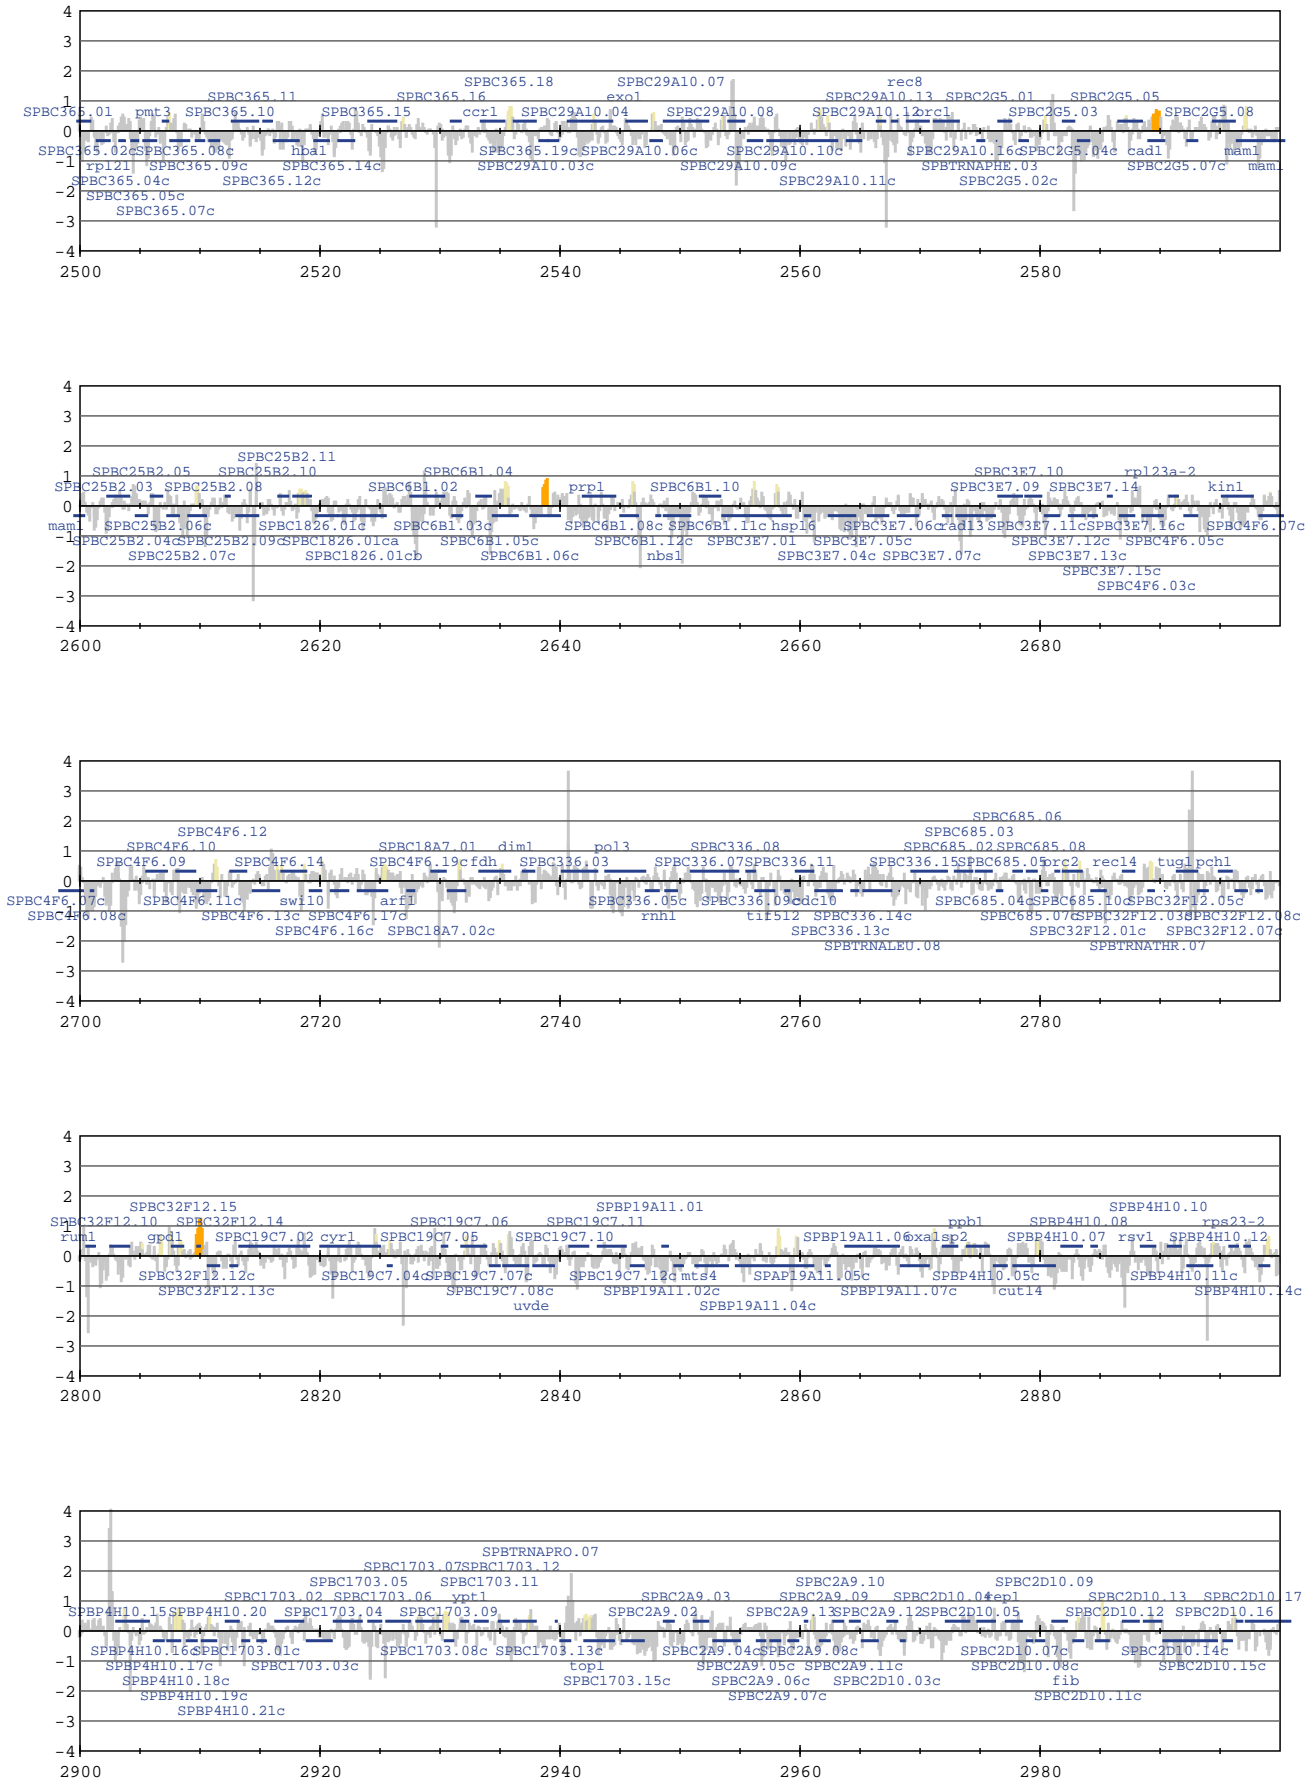

chromosome II

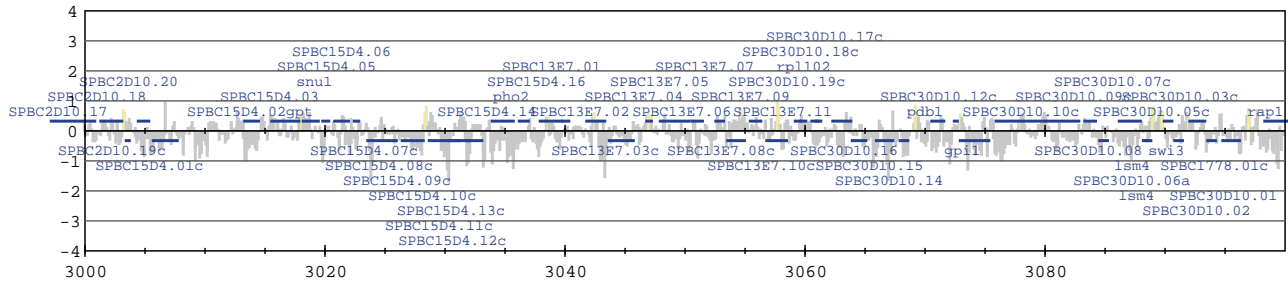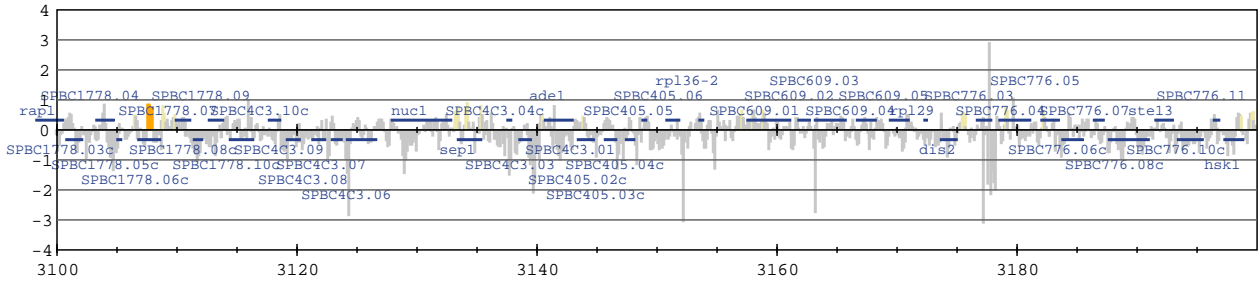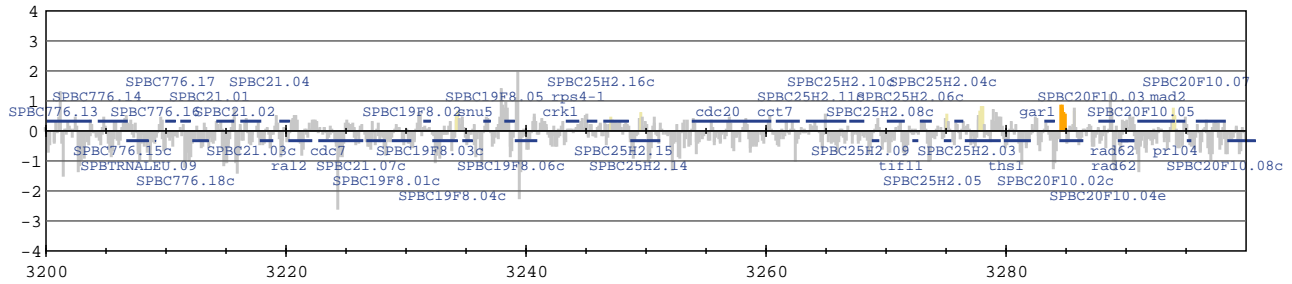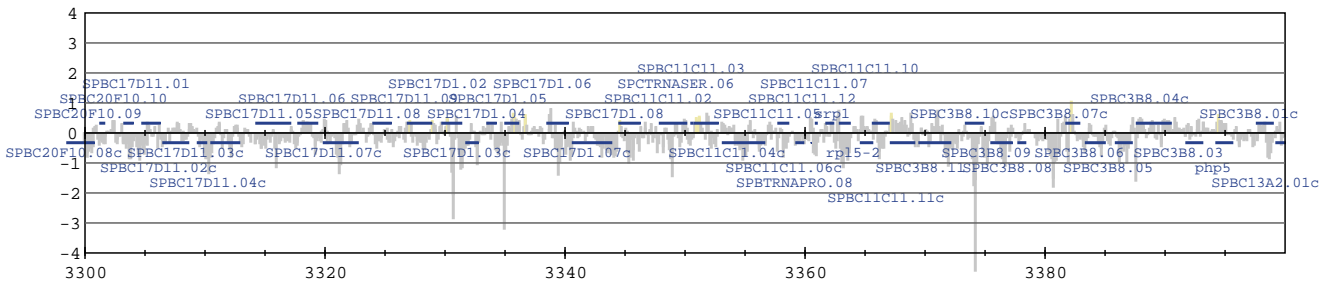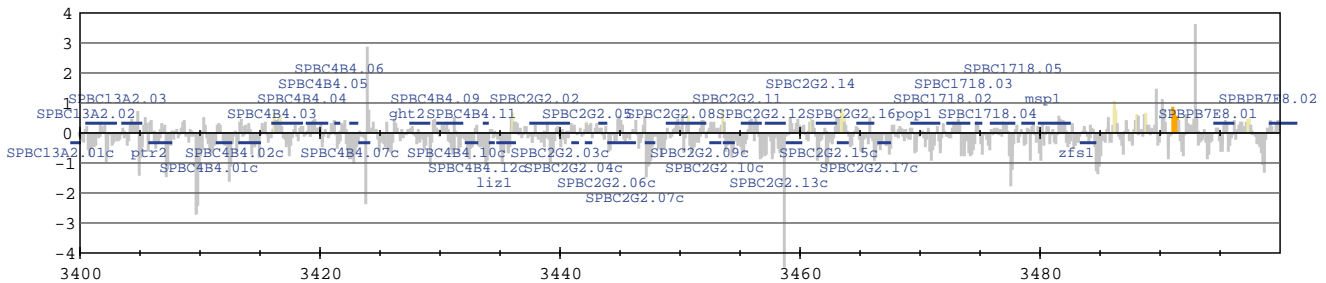



chromosome II

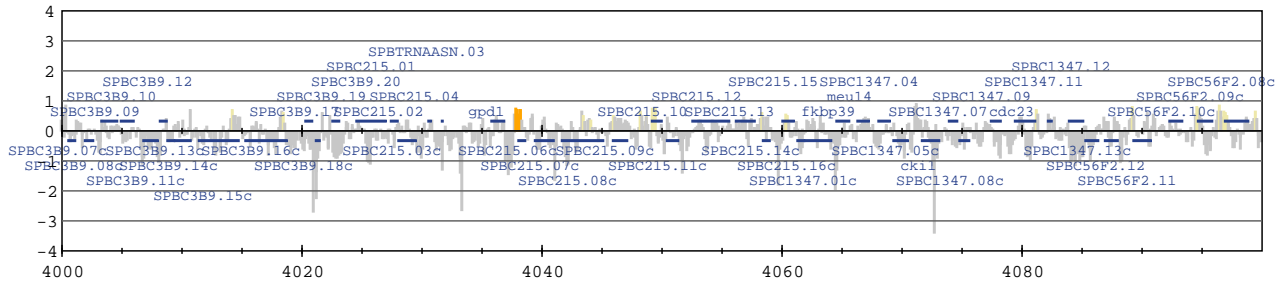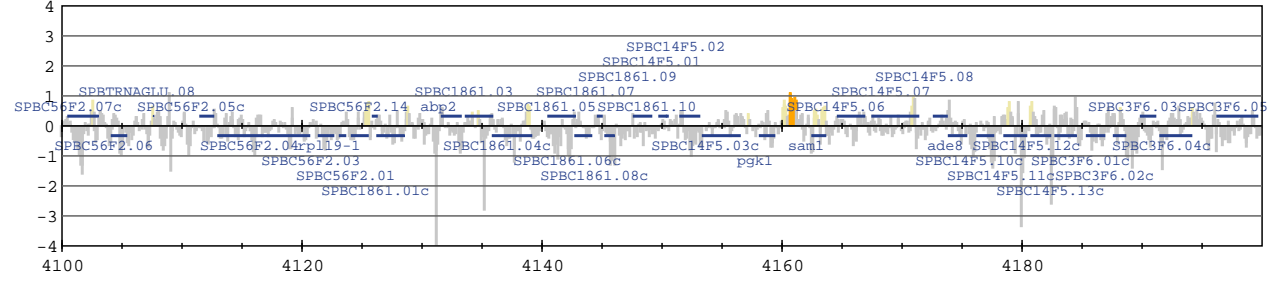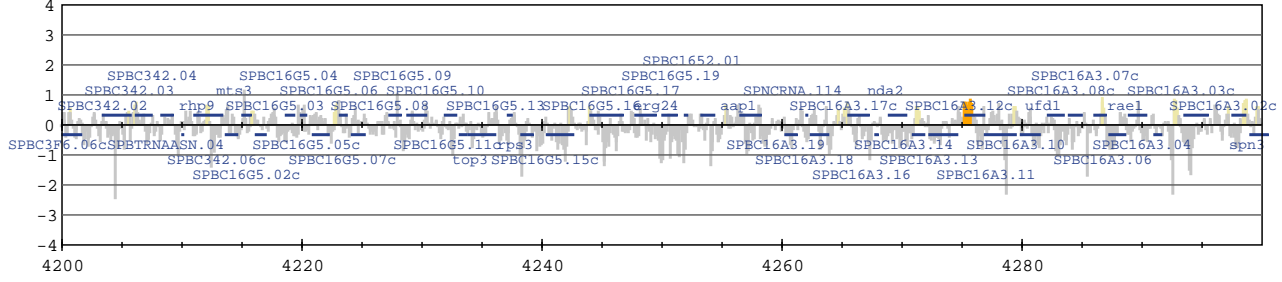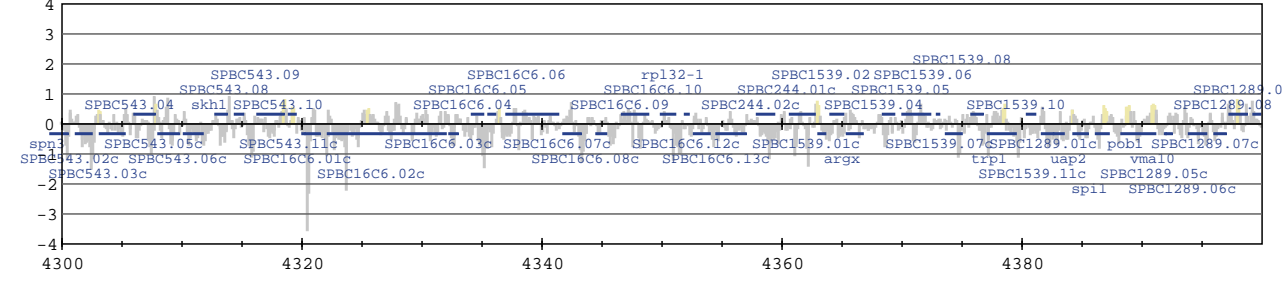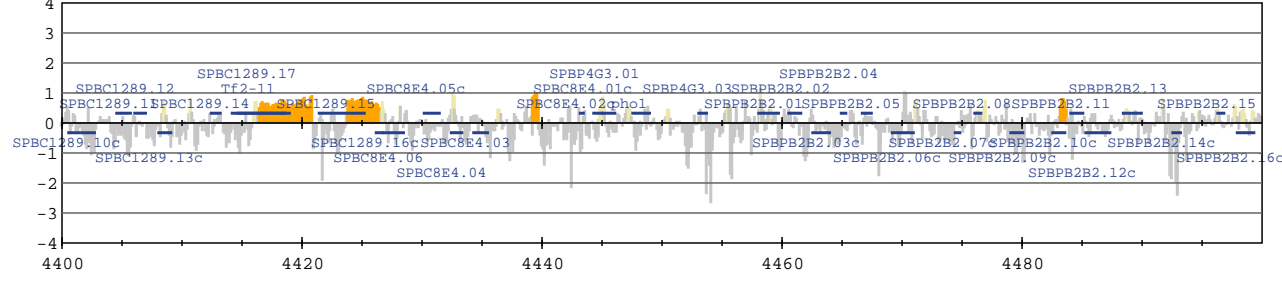

chromosome II

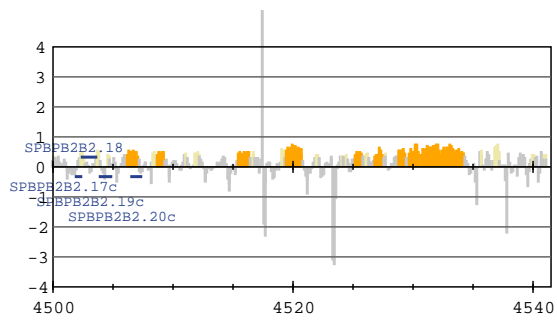

chromosome III

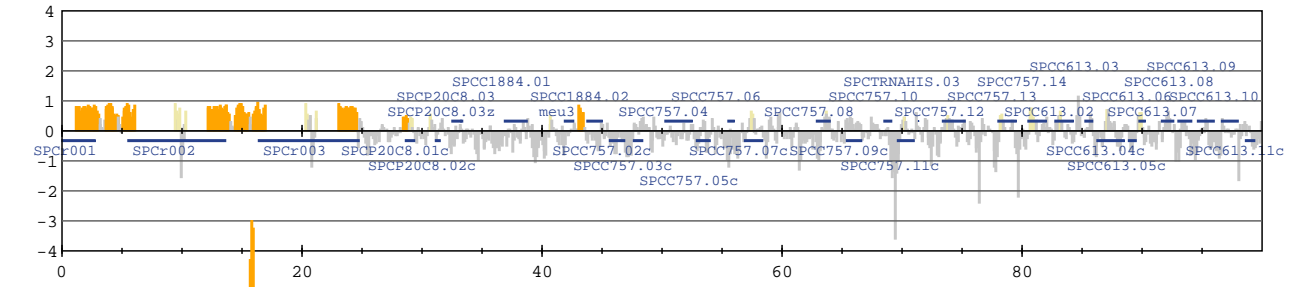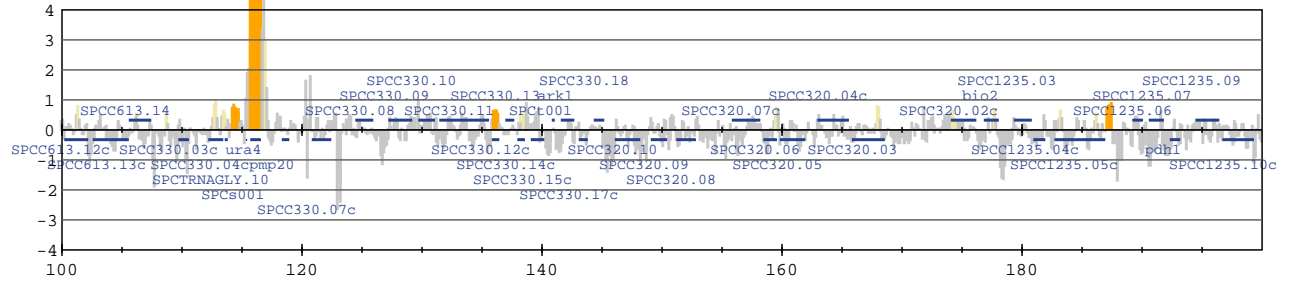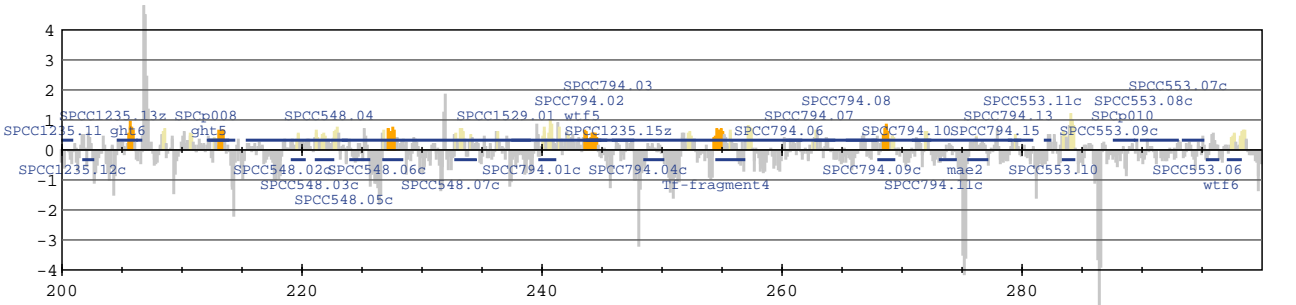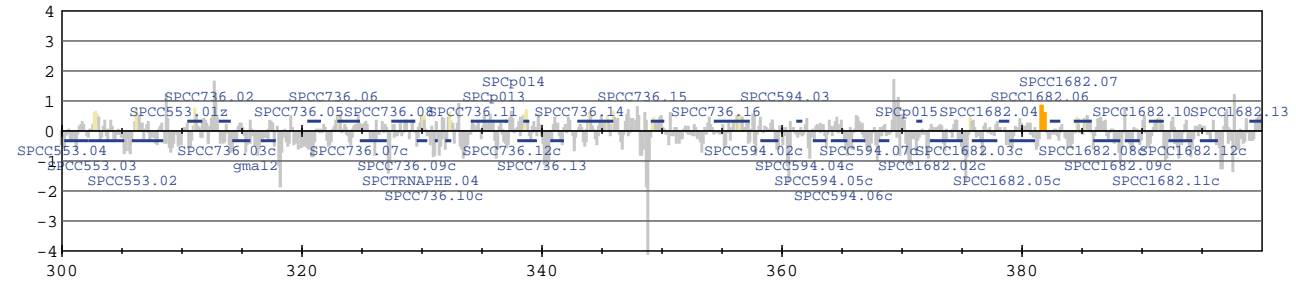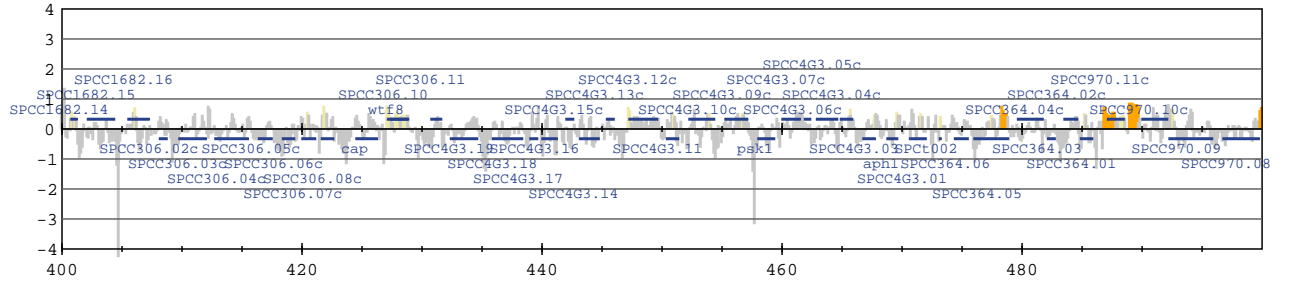

chromosome III

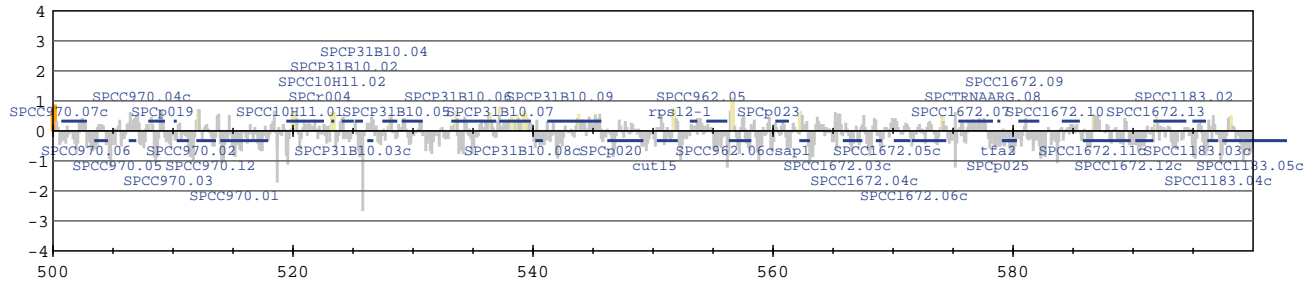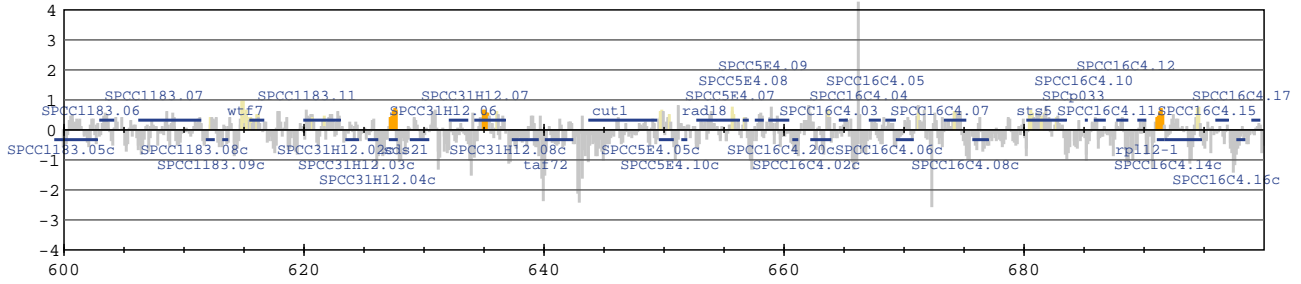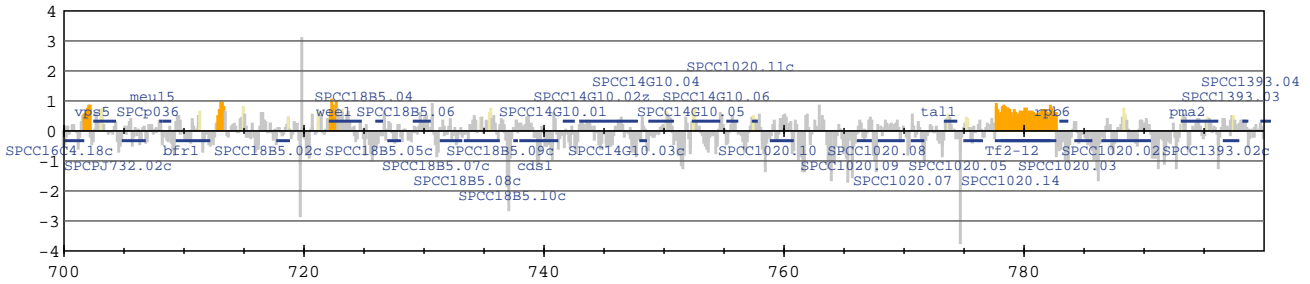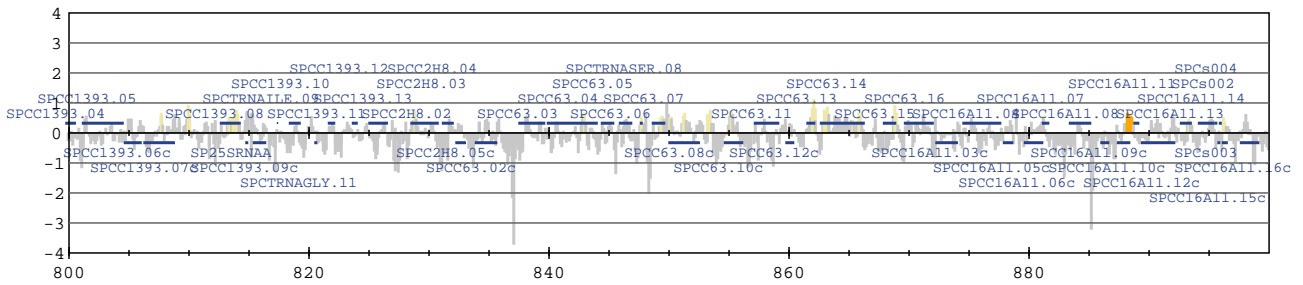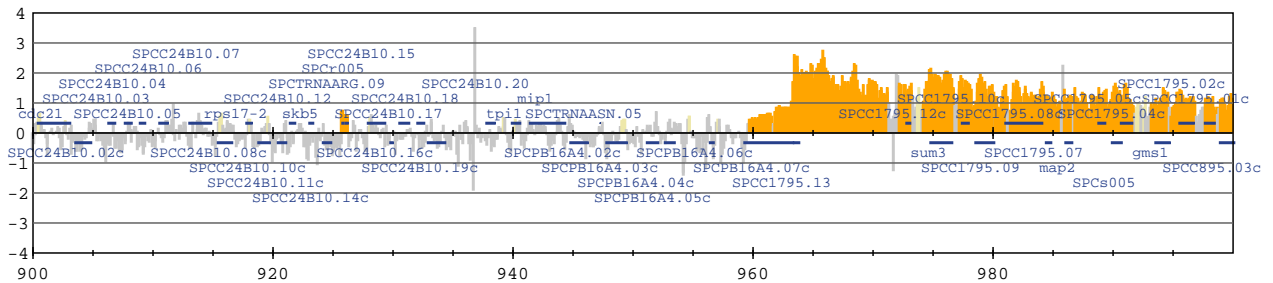

Supplement: emboj2008215s1.pdf [file emboj2008215s1.pdf]
