# Supplementary material
Source: PubMed Central journal article supplement (PMC2585166)

chromosome I

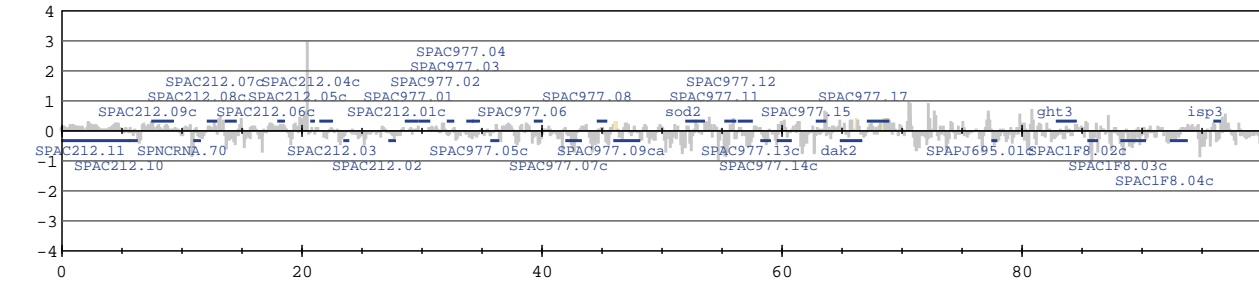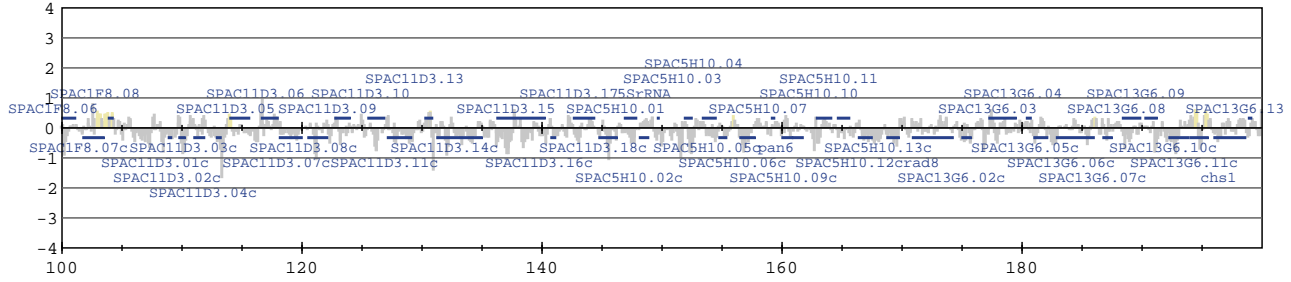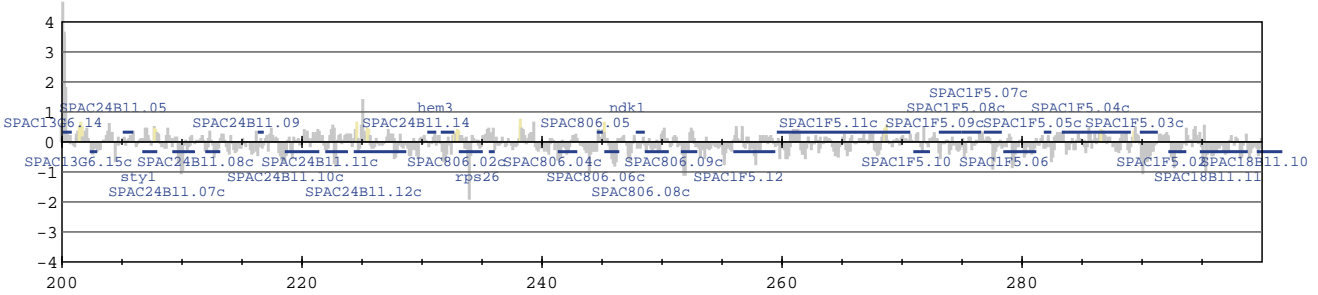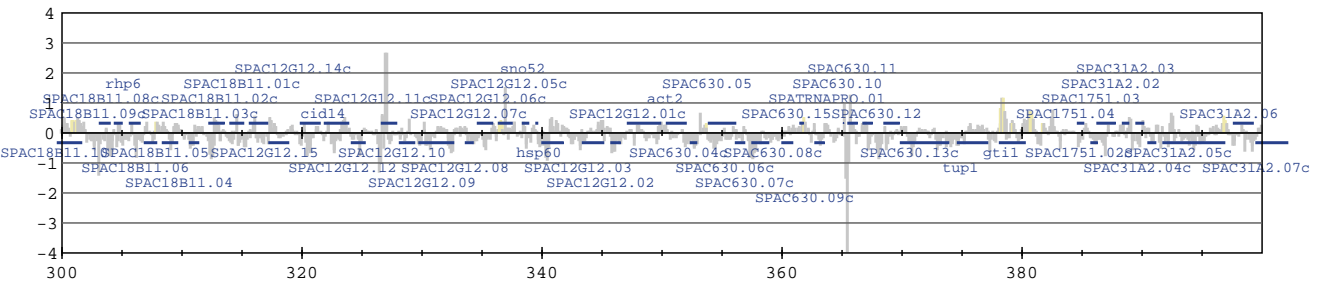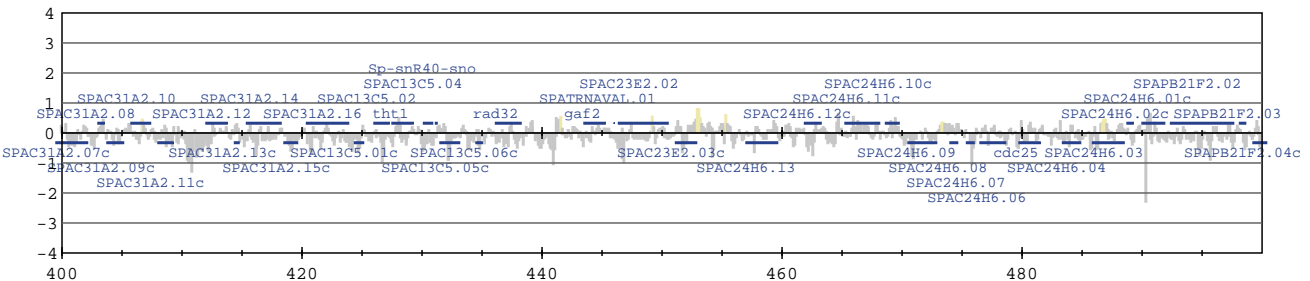

chromosome I

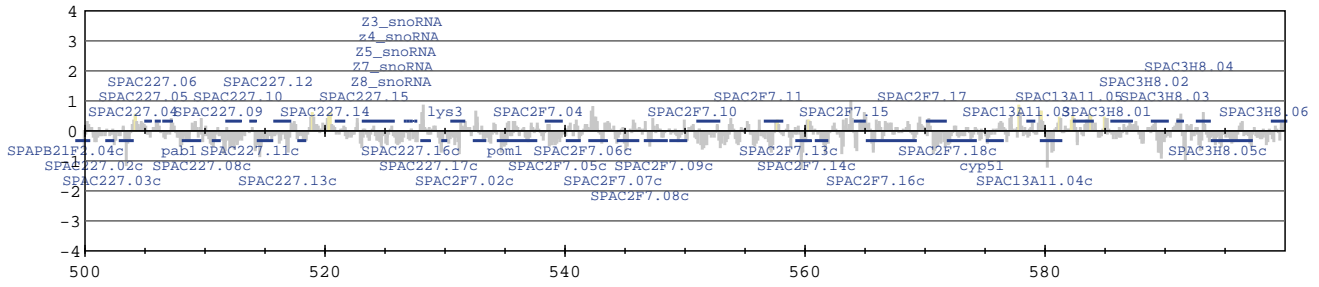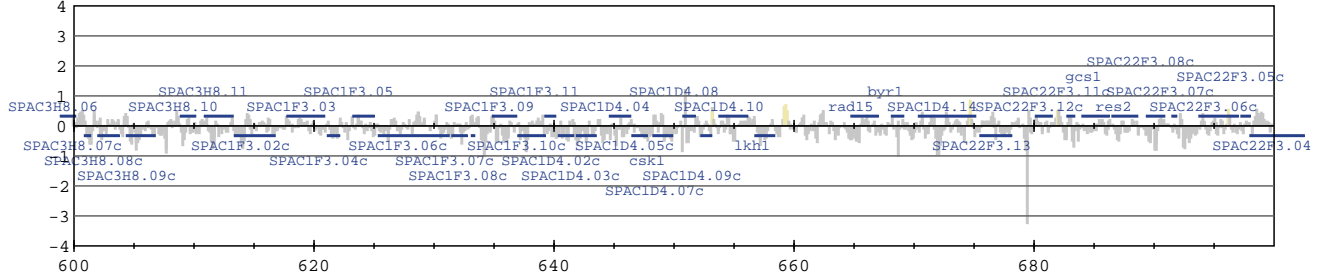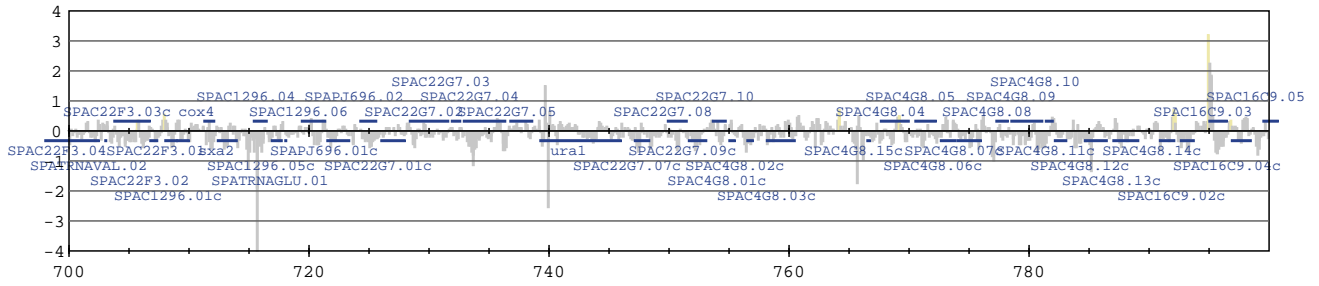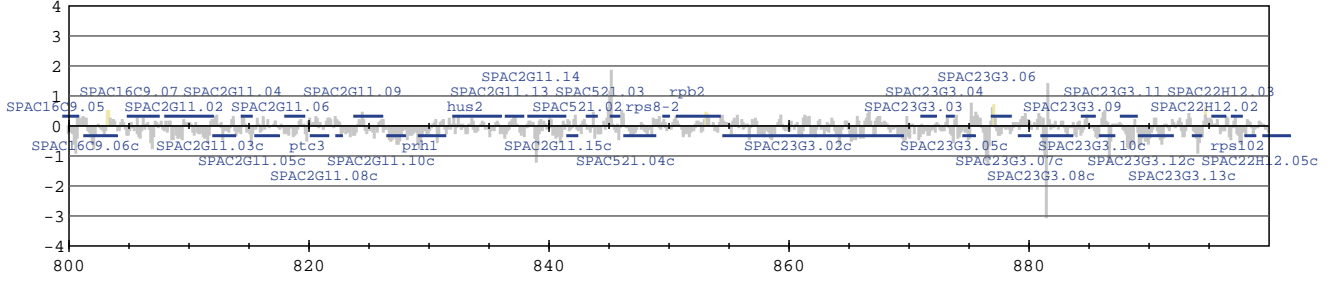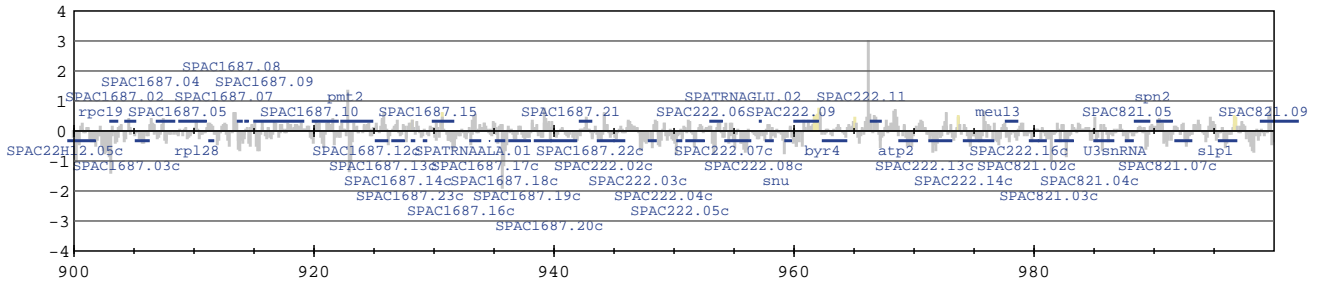

chromosome I

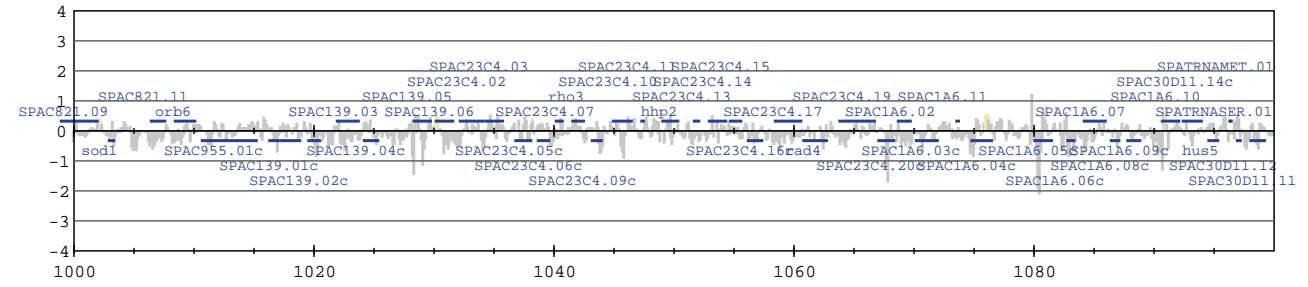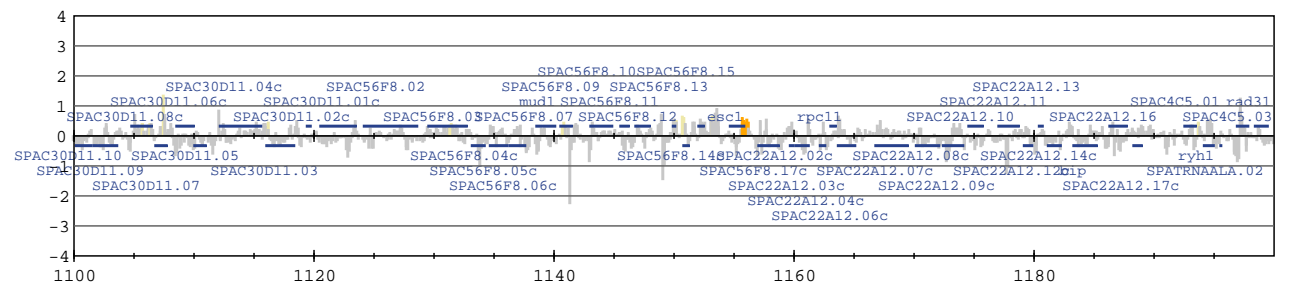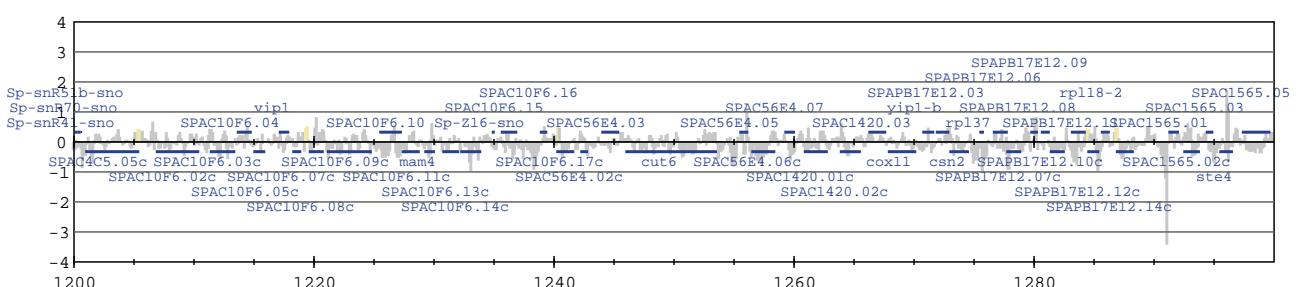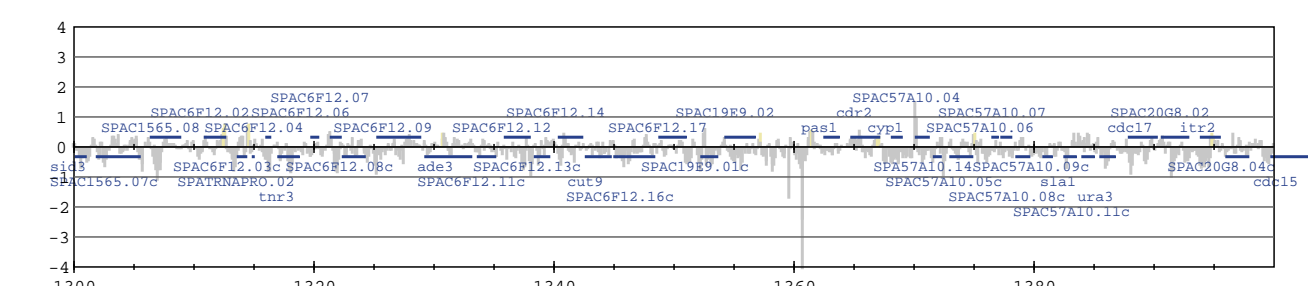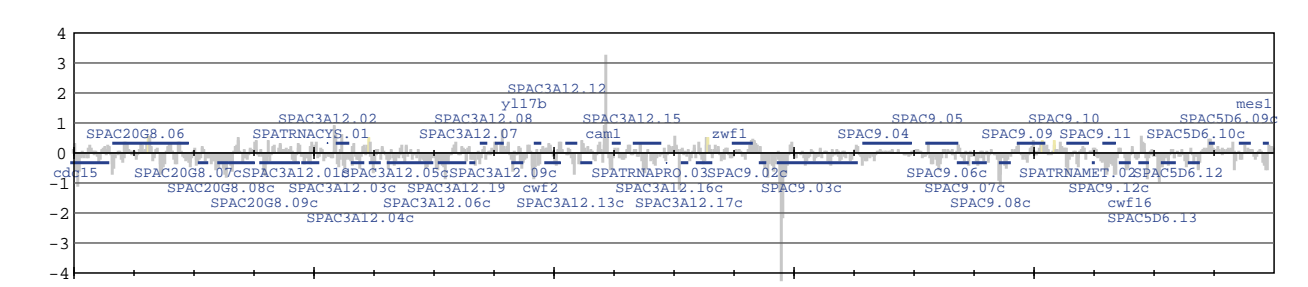

chromosome I

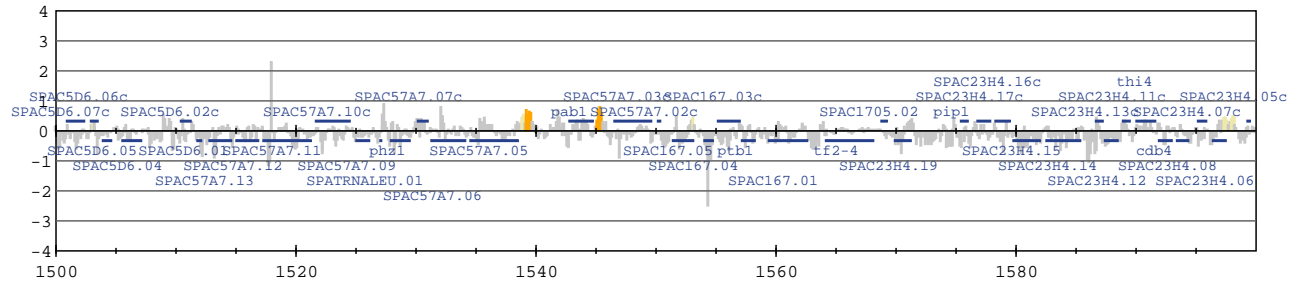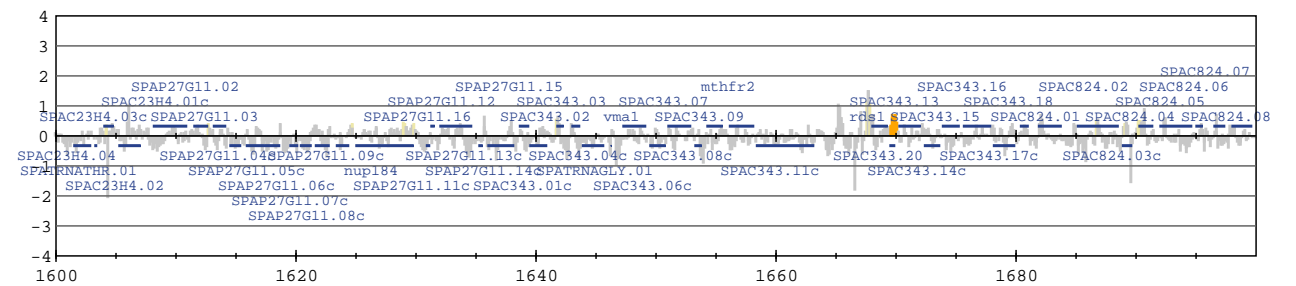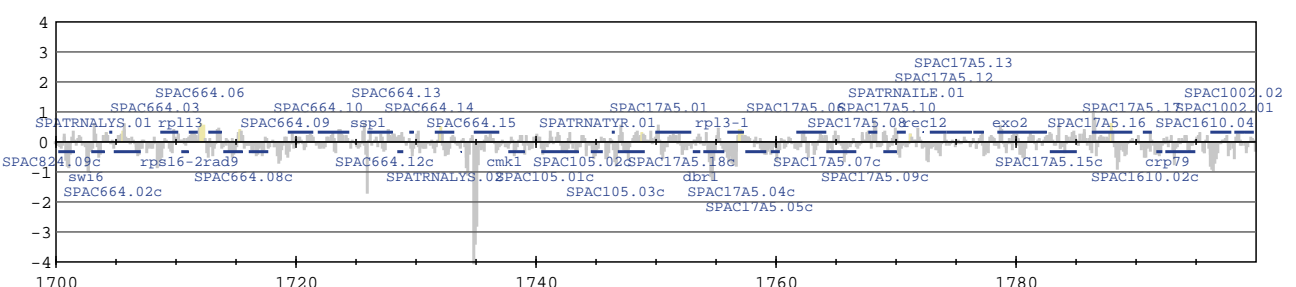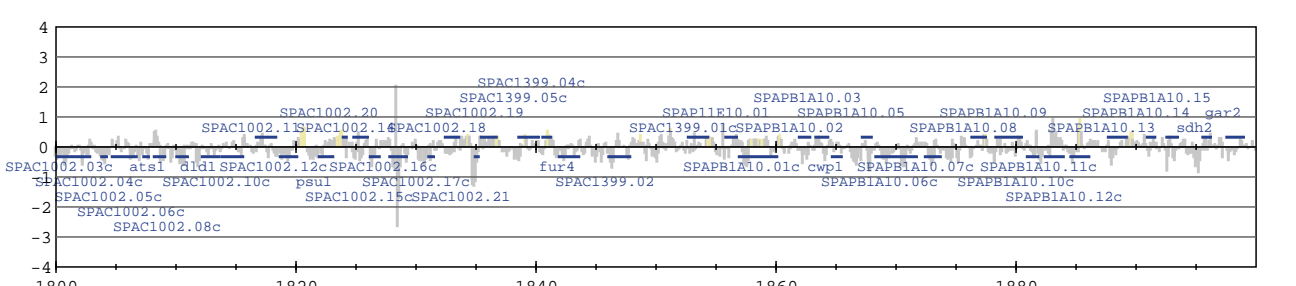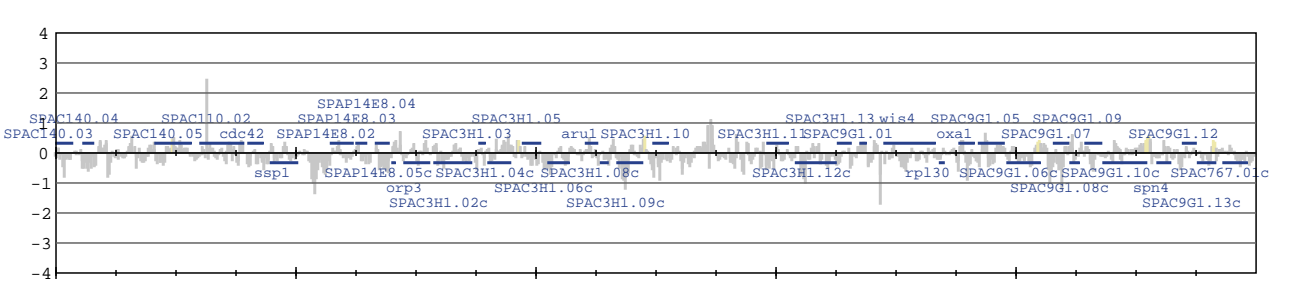



chromosome I

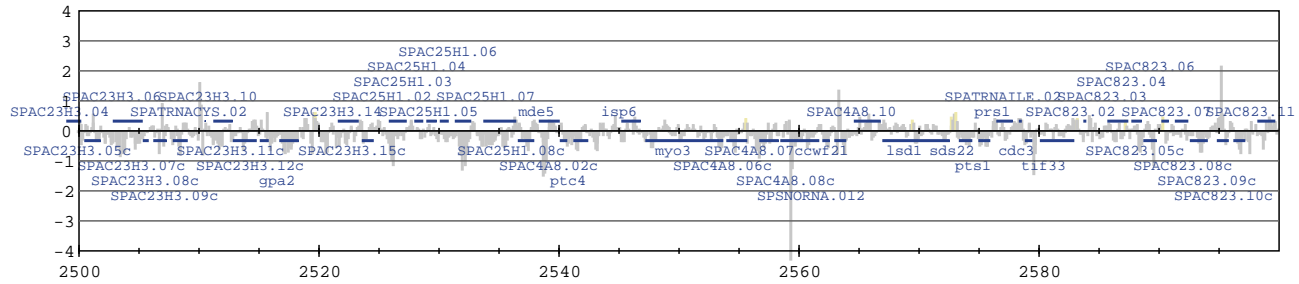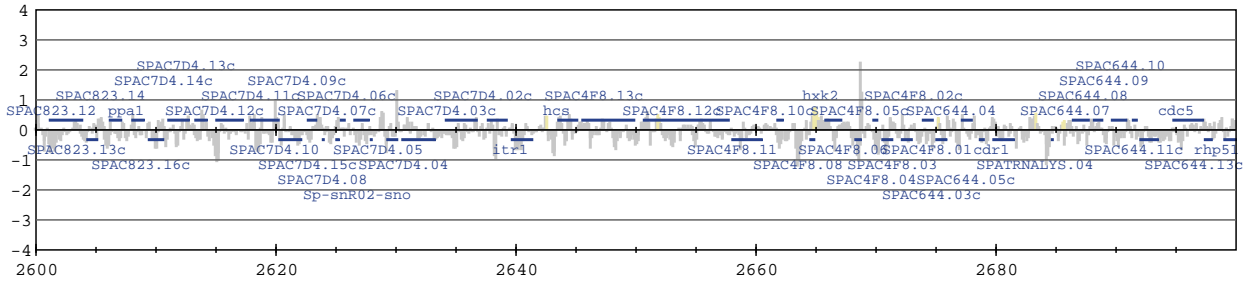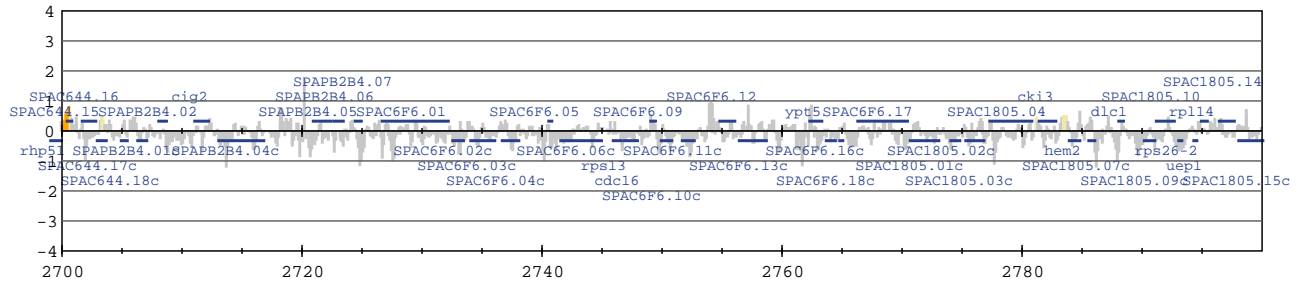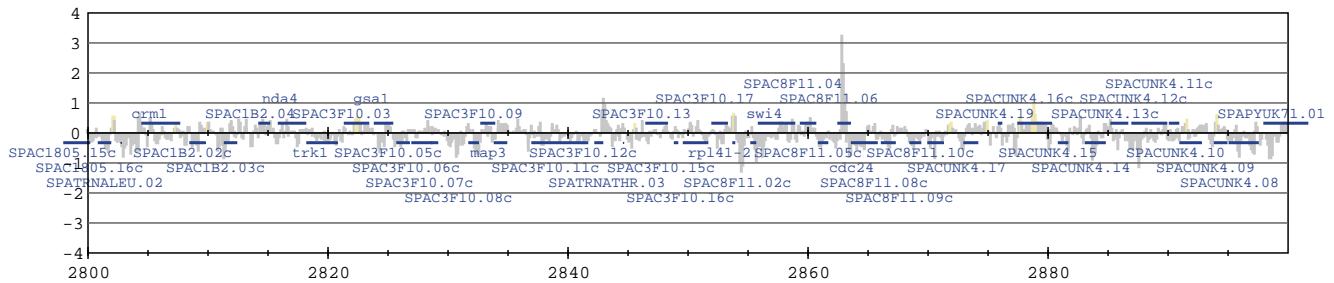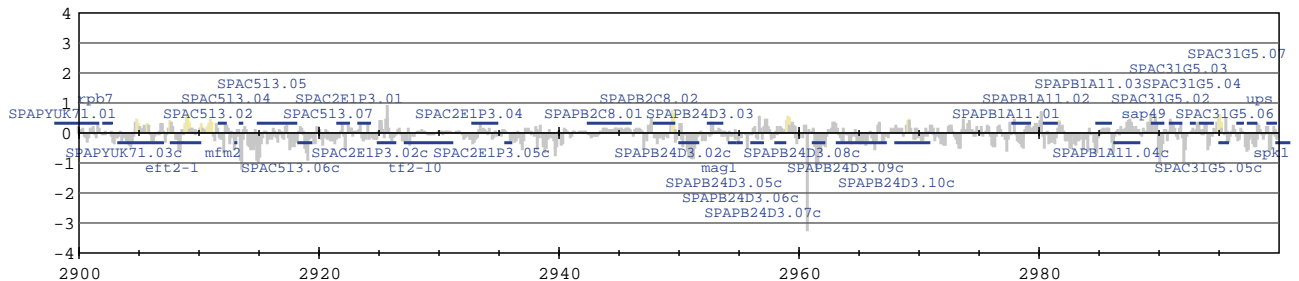

chromosome I

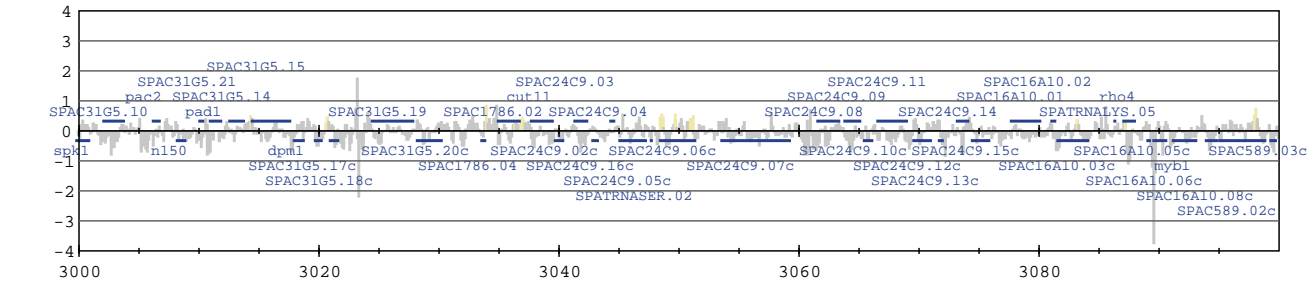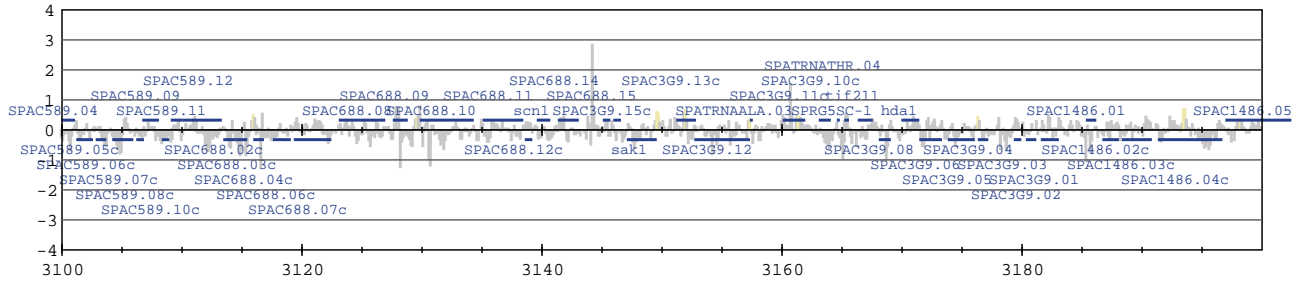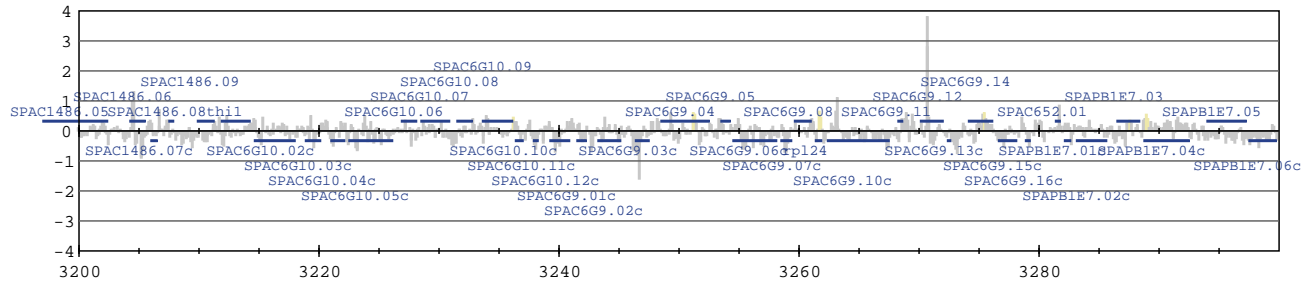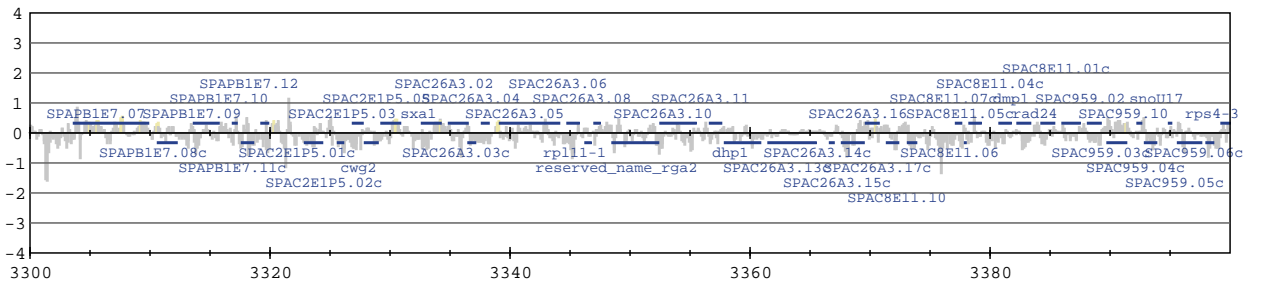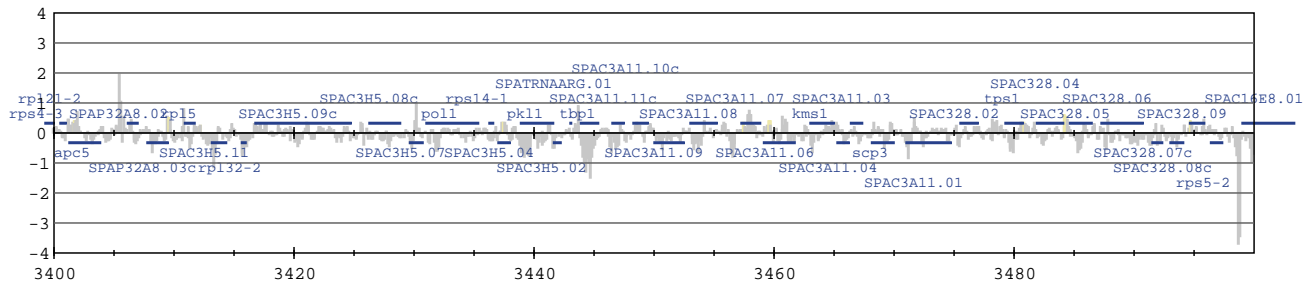

chromosome I

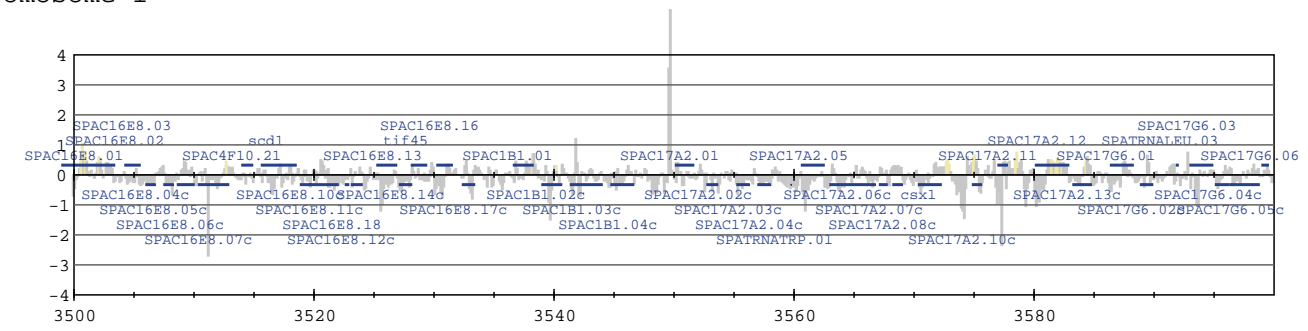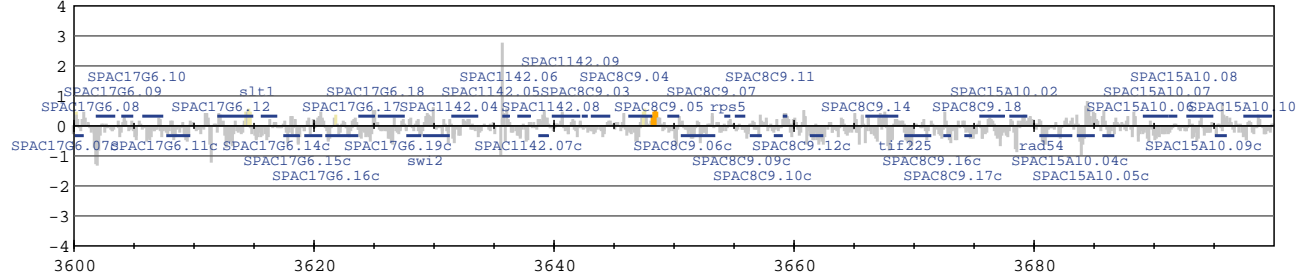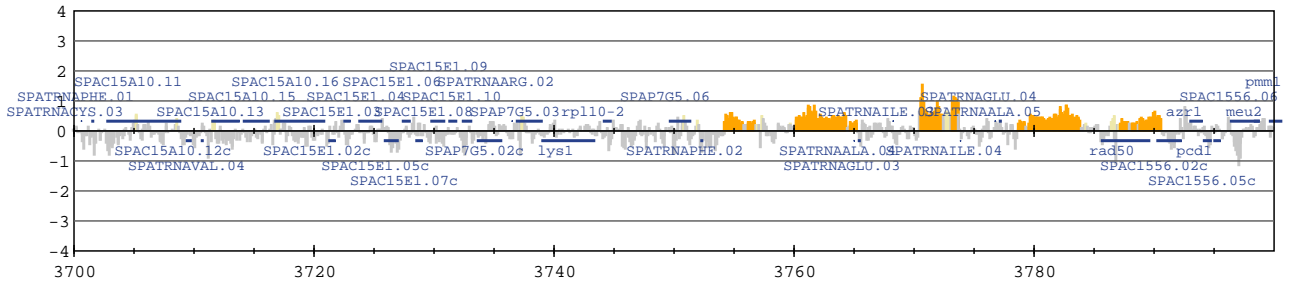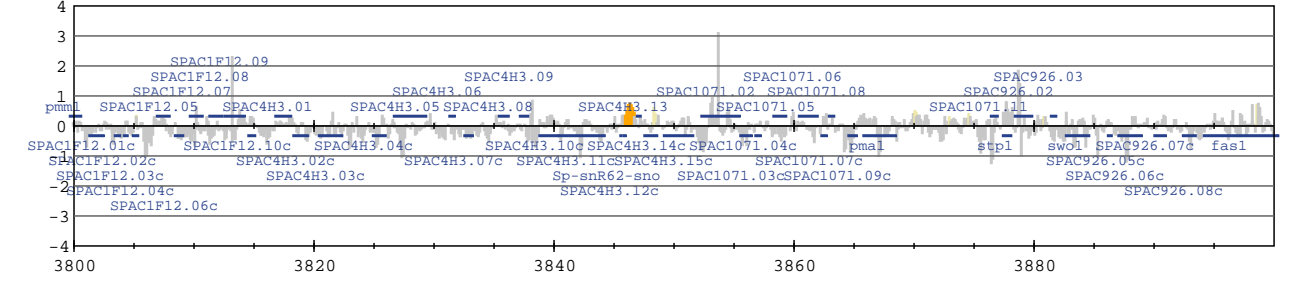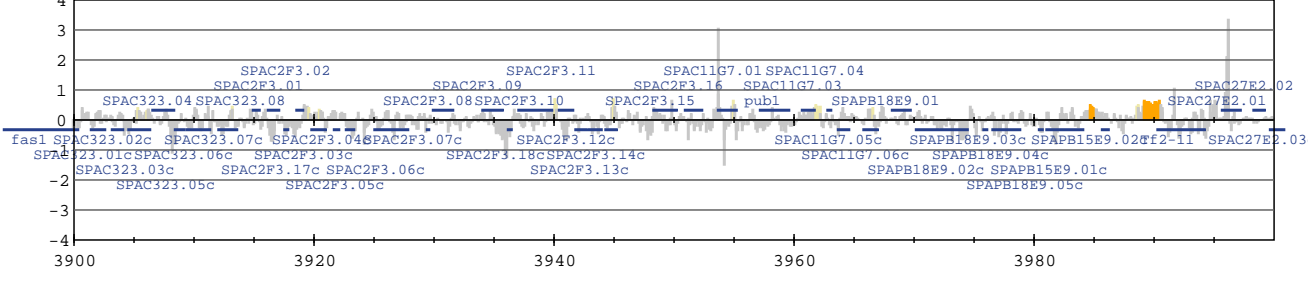



chromosome I

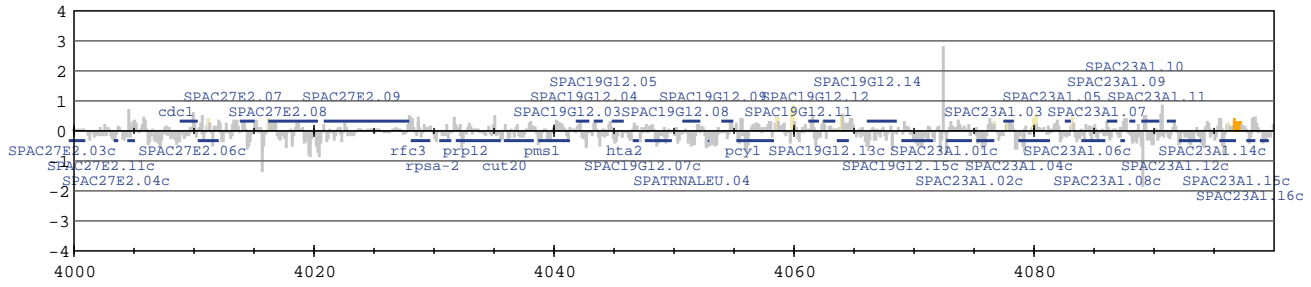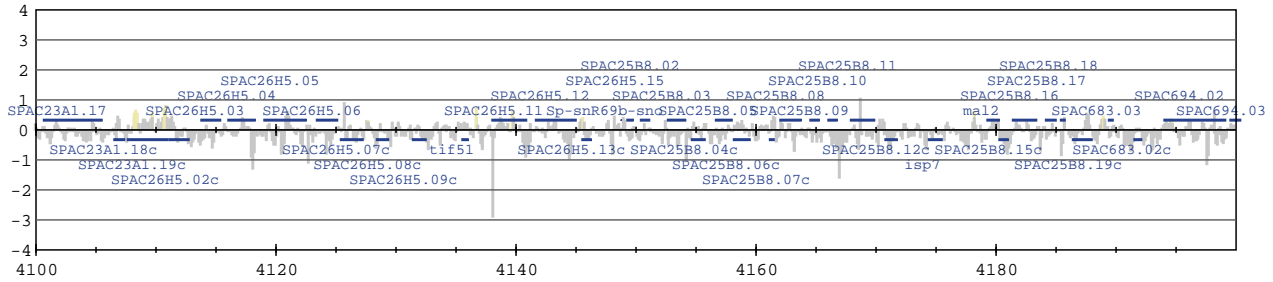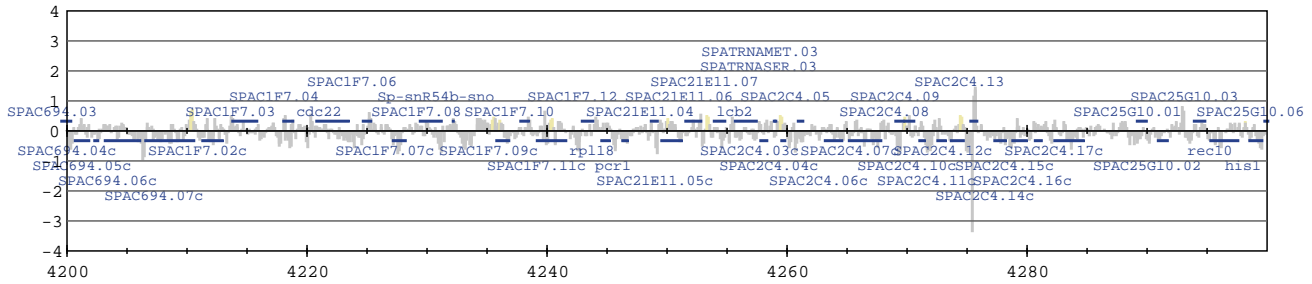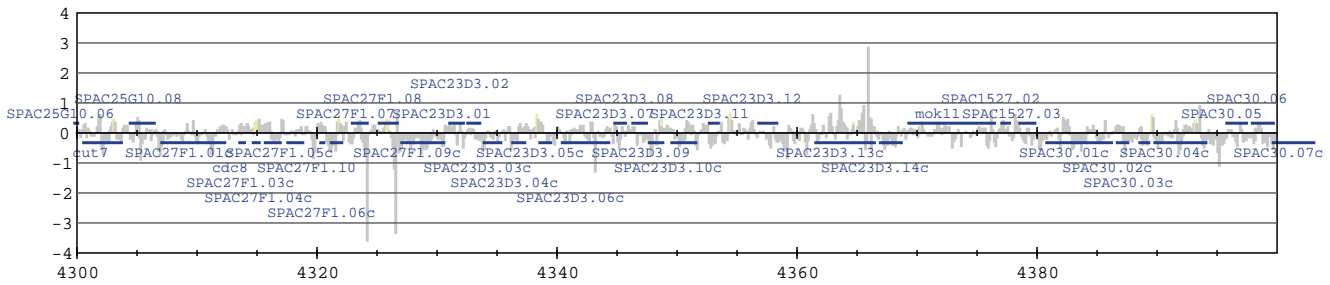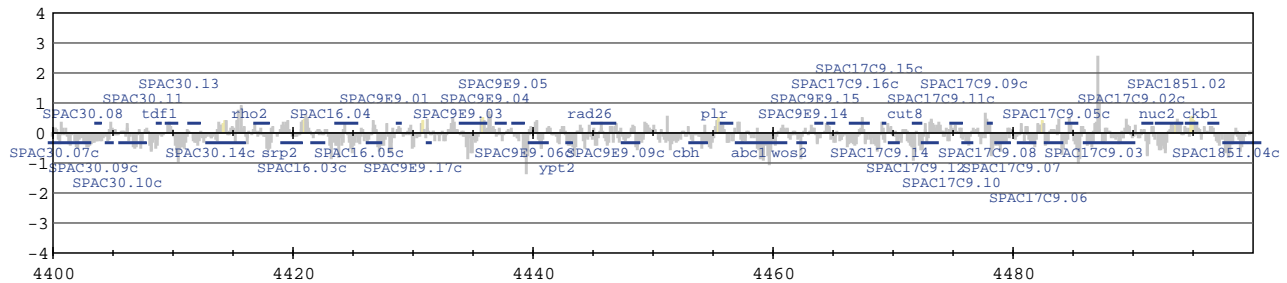

chromosome I

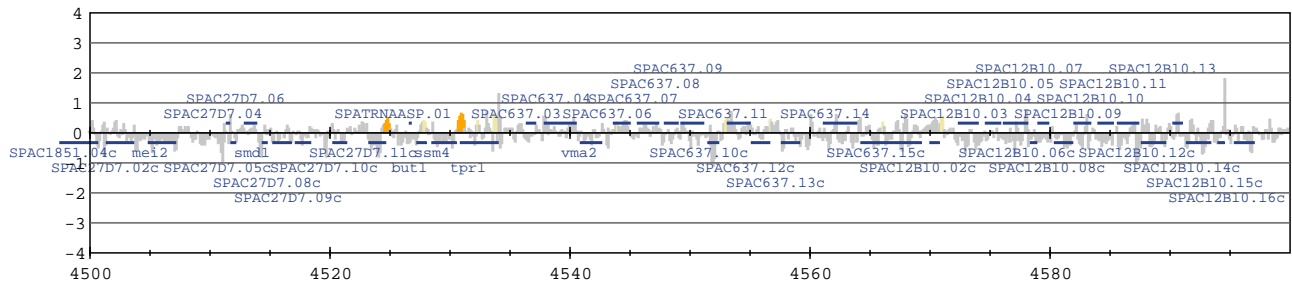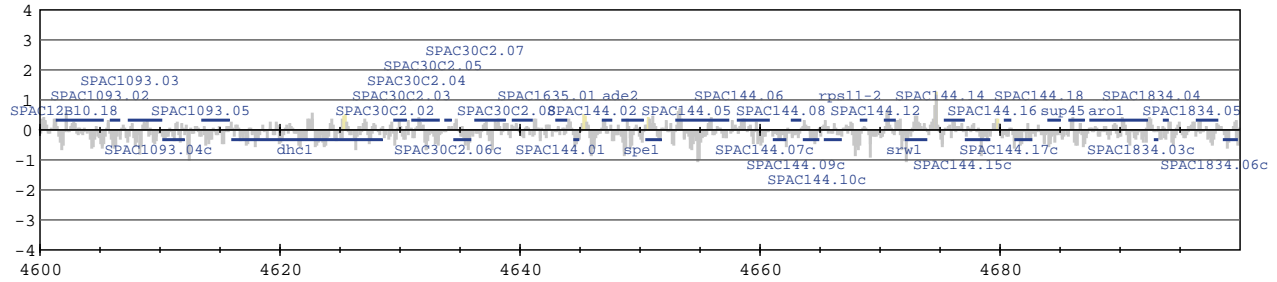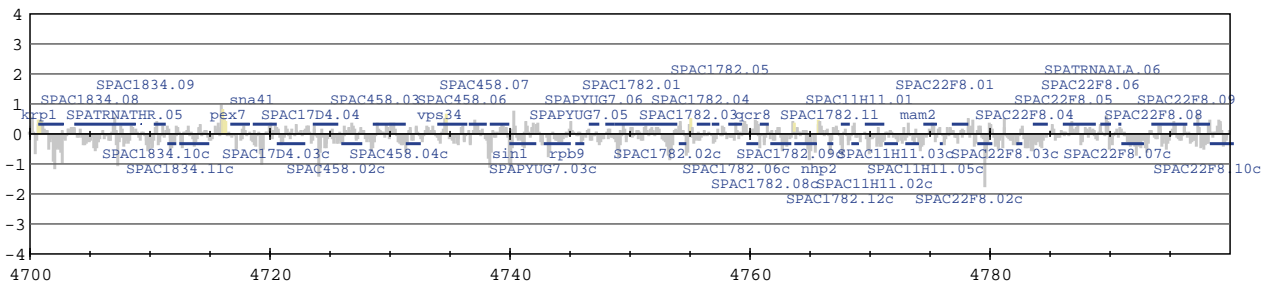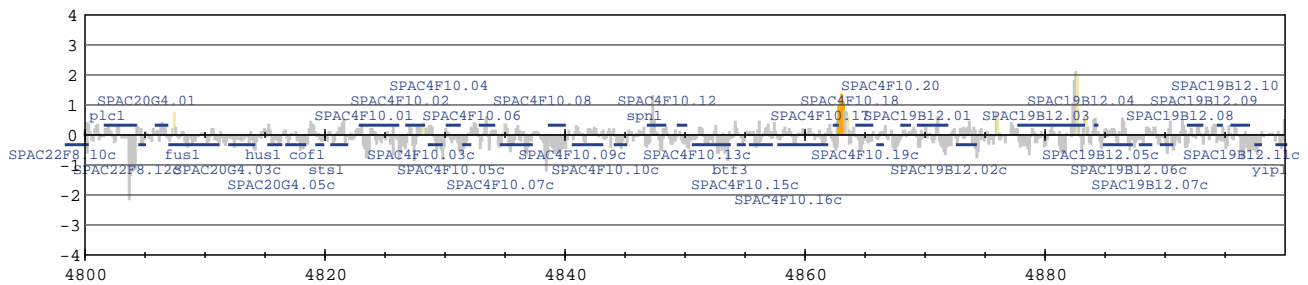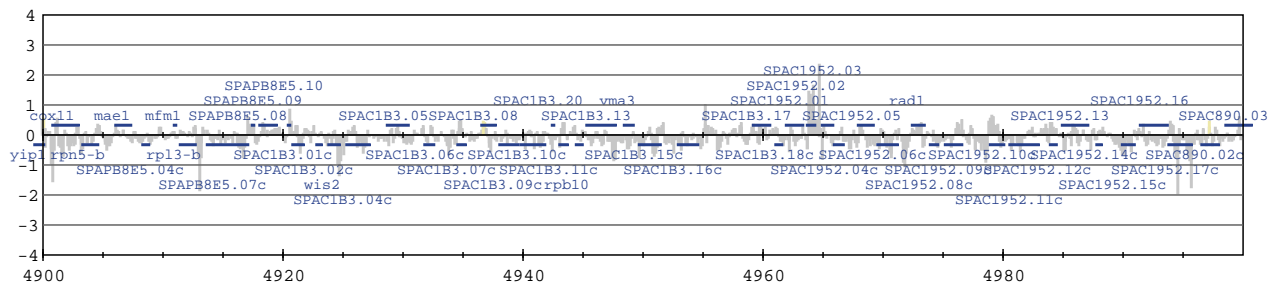

chromosome I

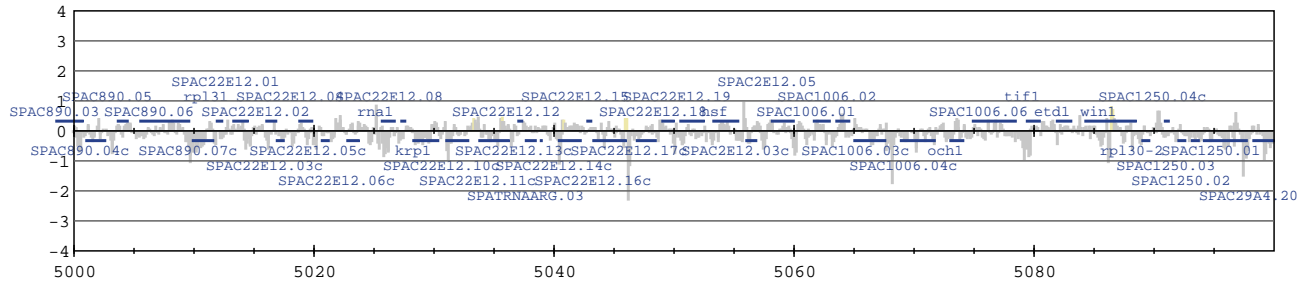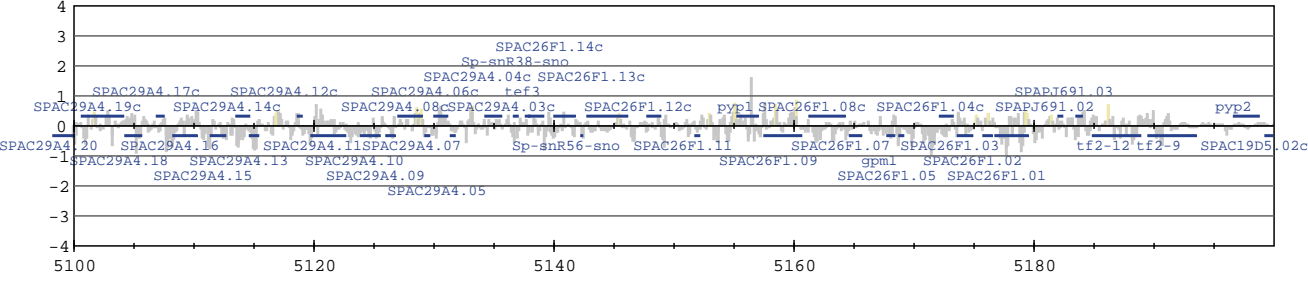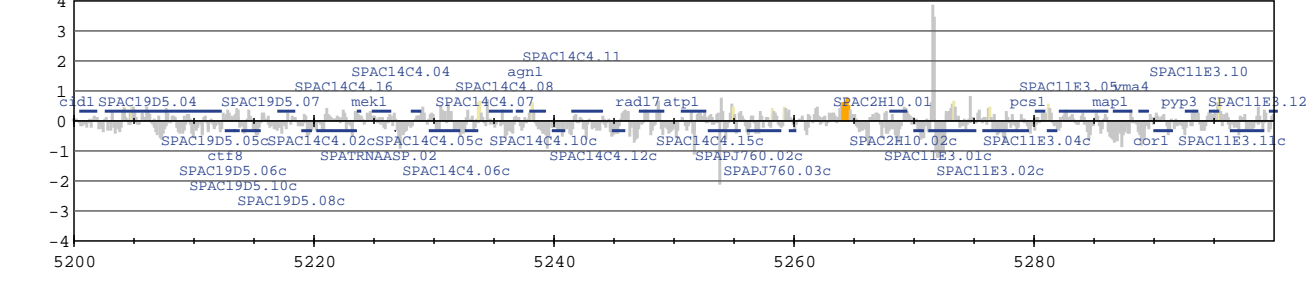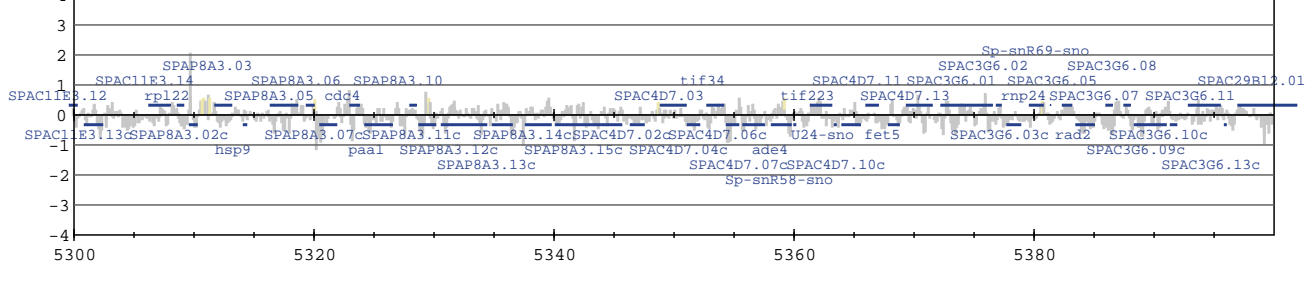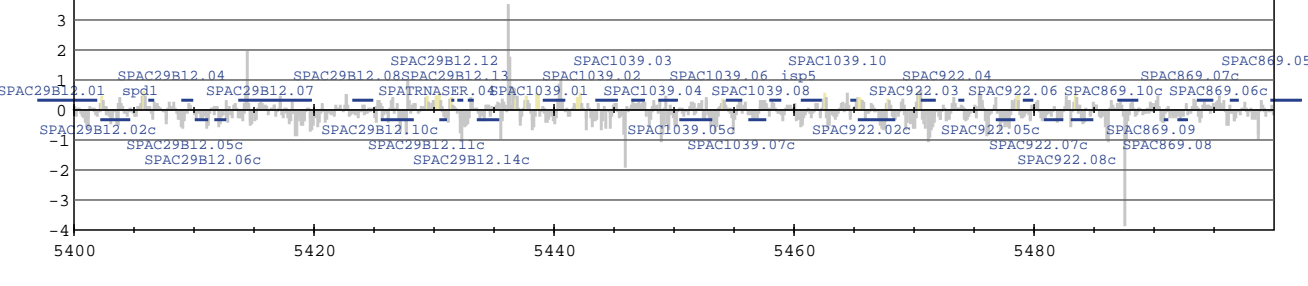

chromosome I

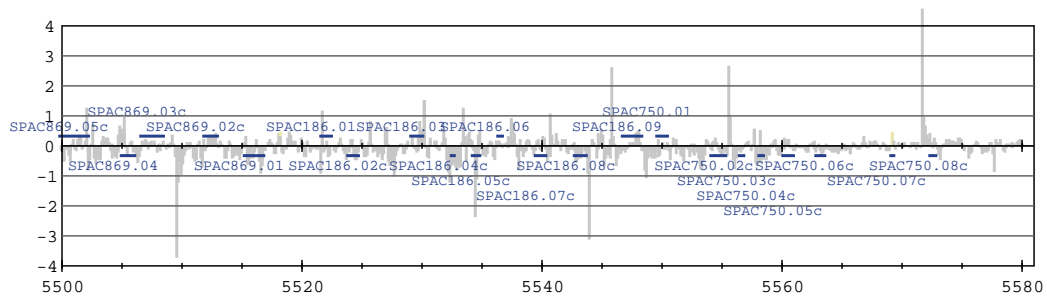

chromosome II

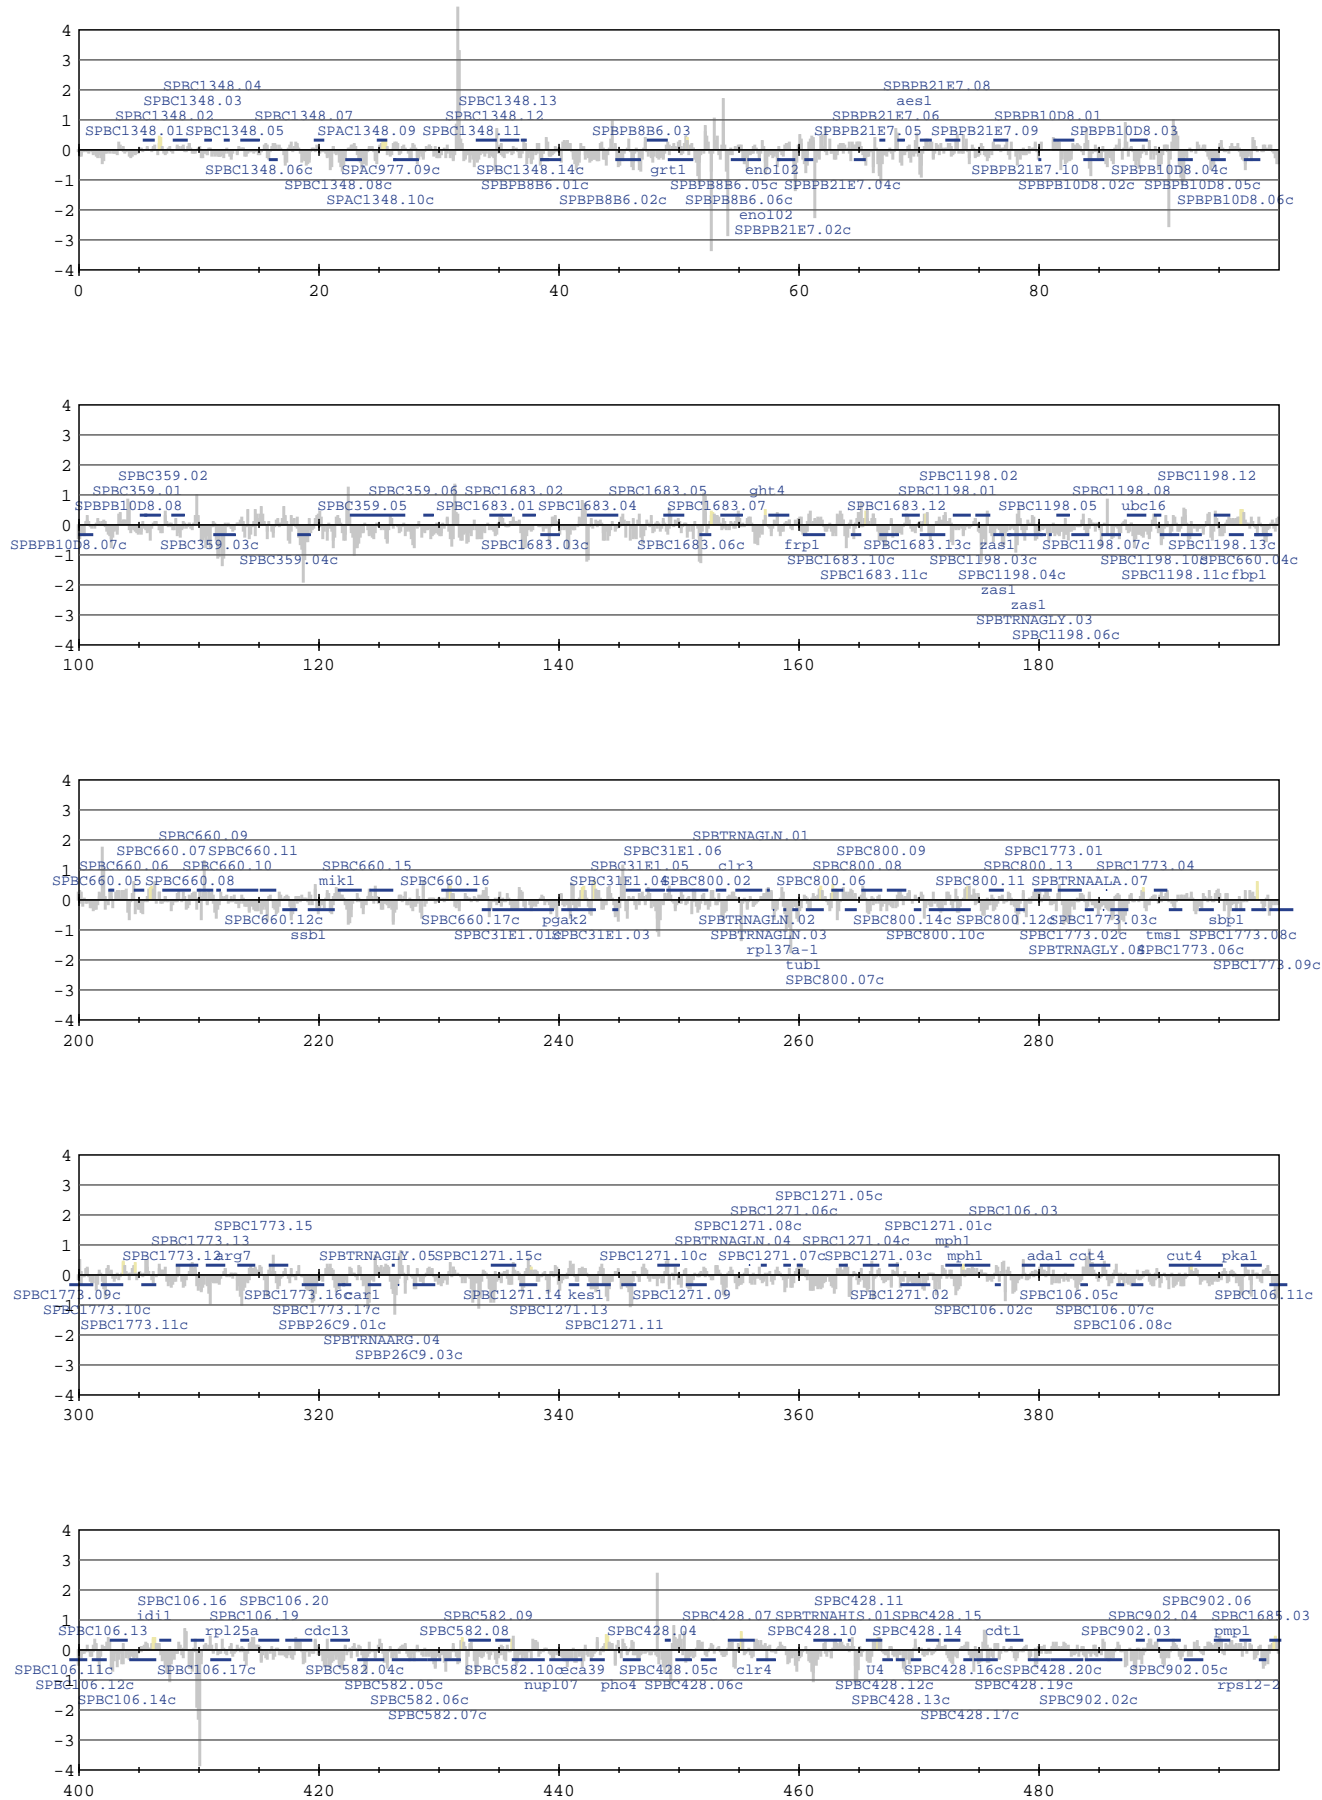

chromosome II

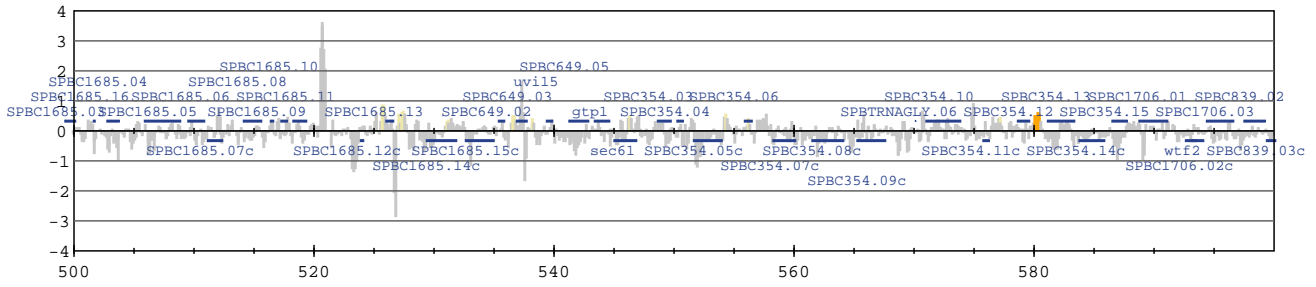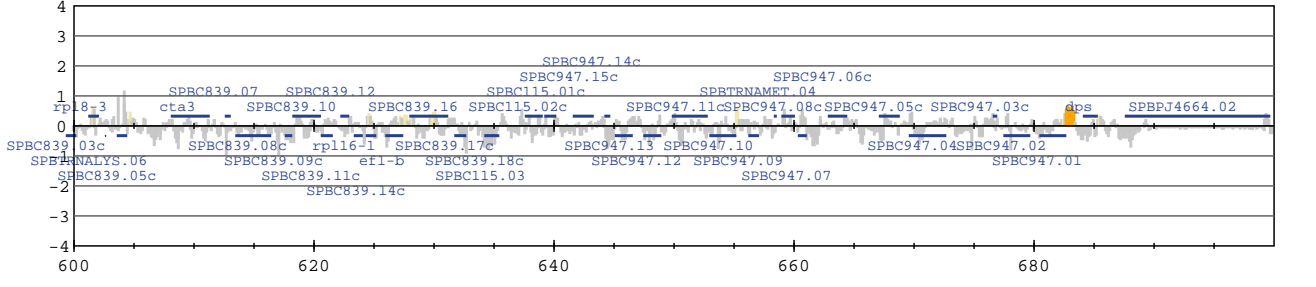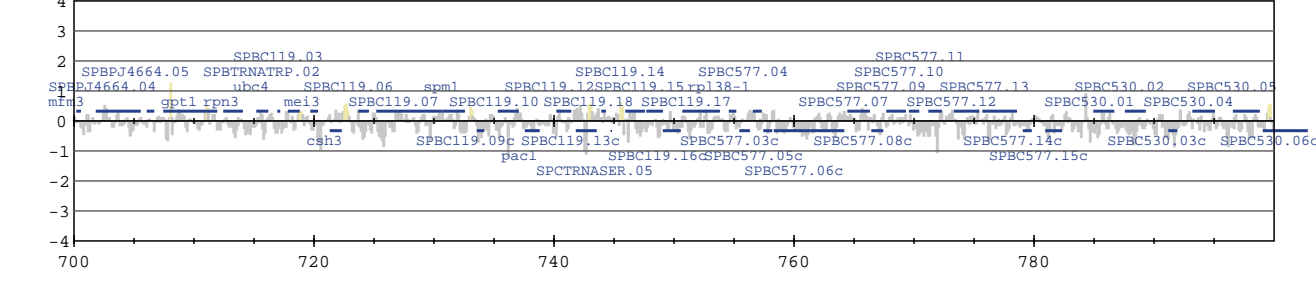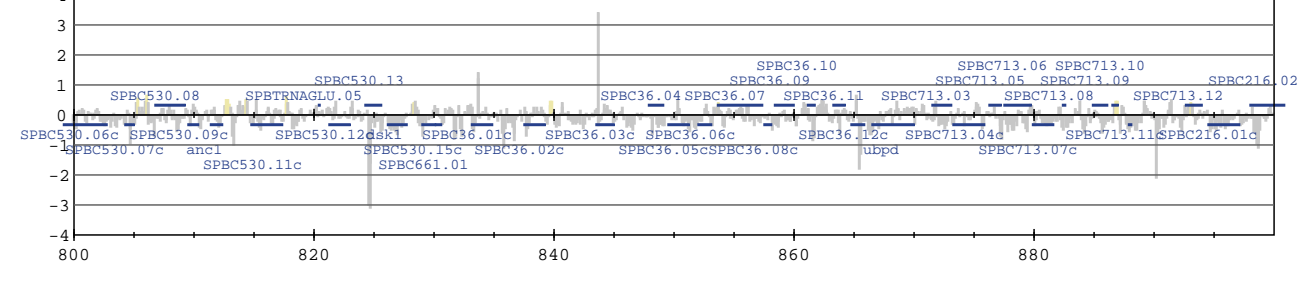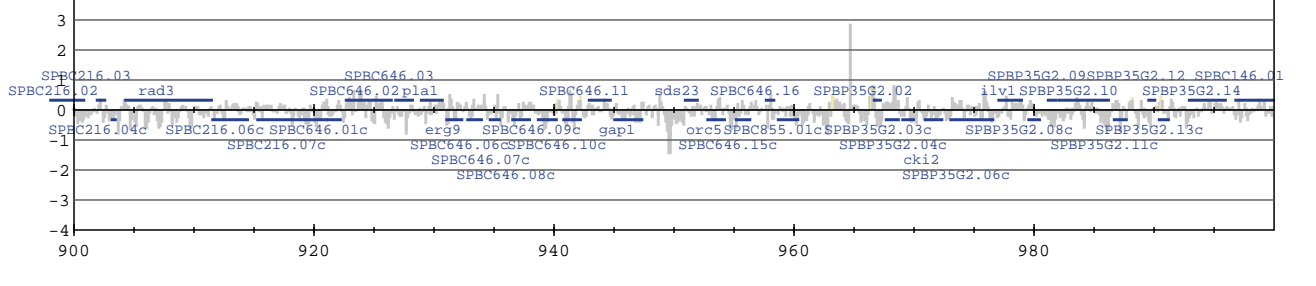

chromosome II

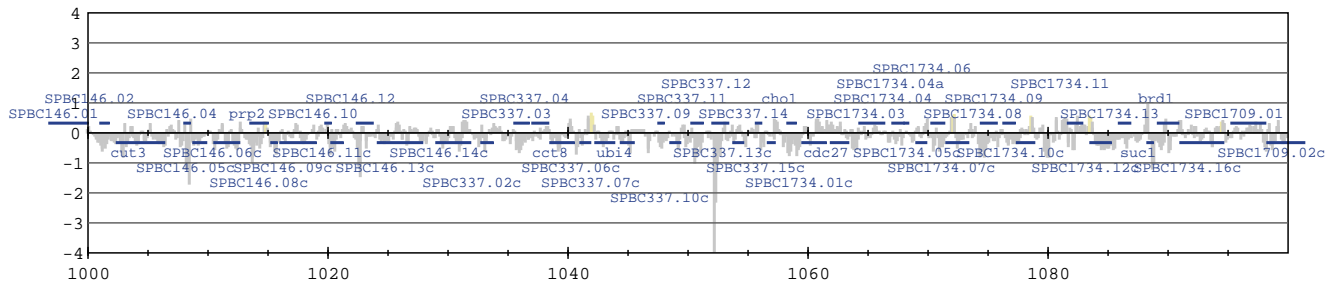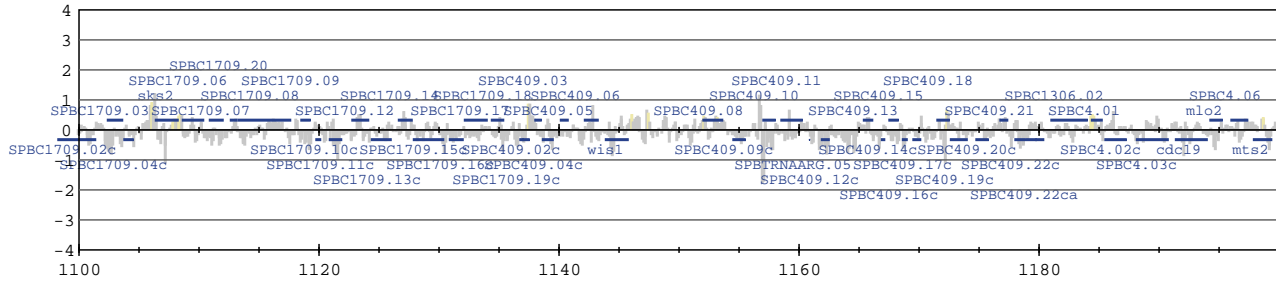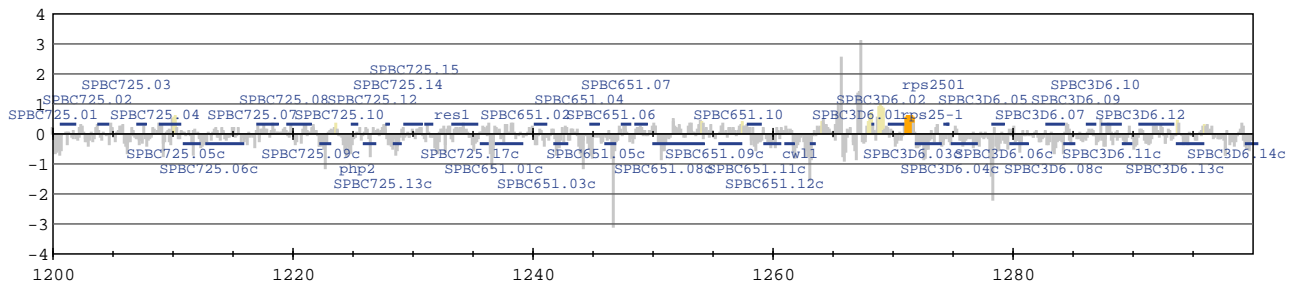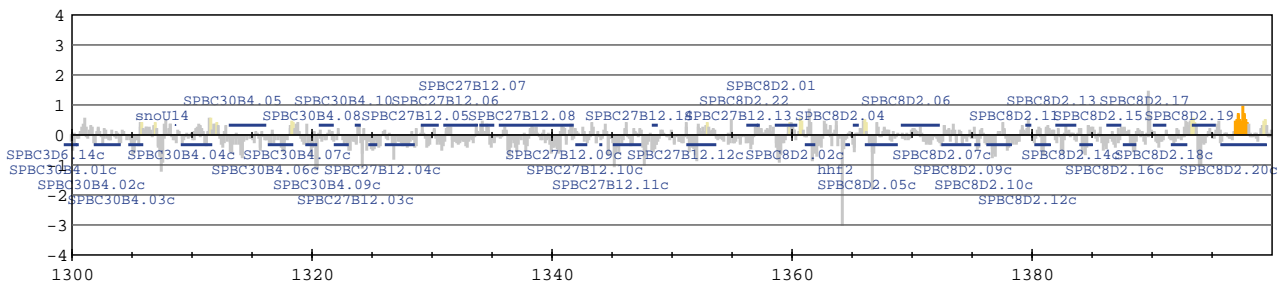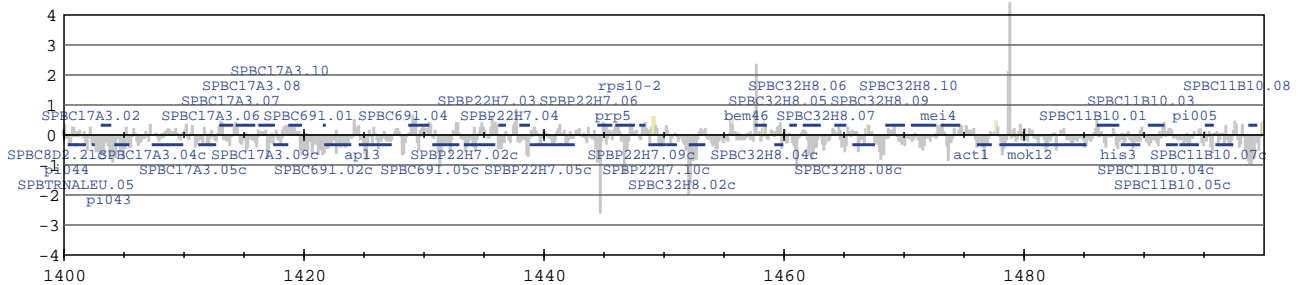

chromosome II

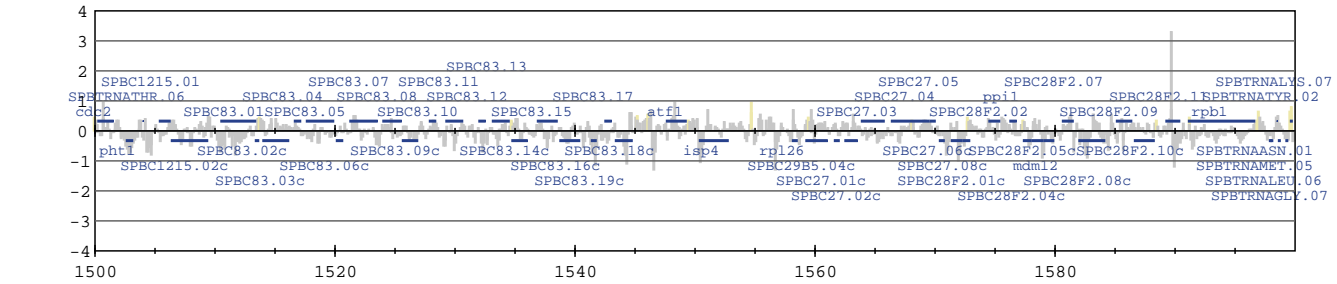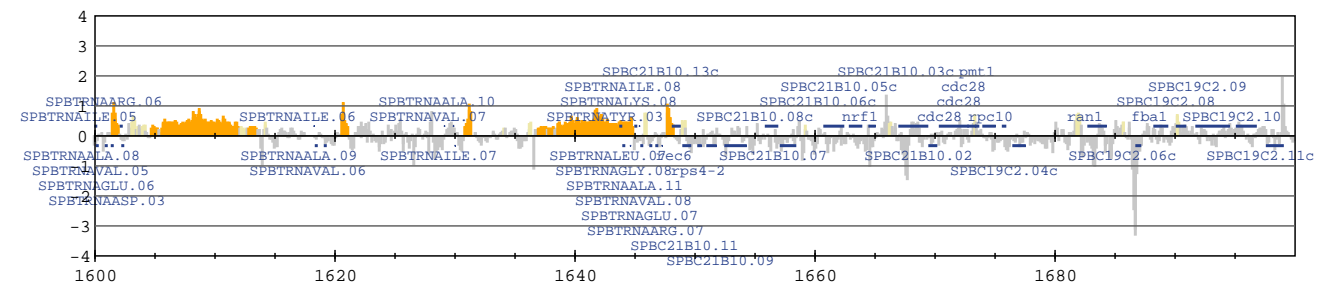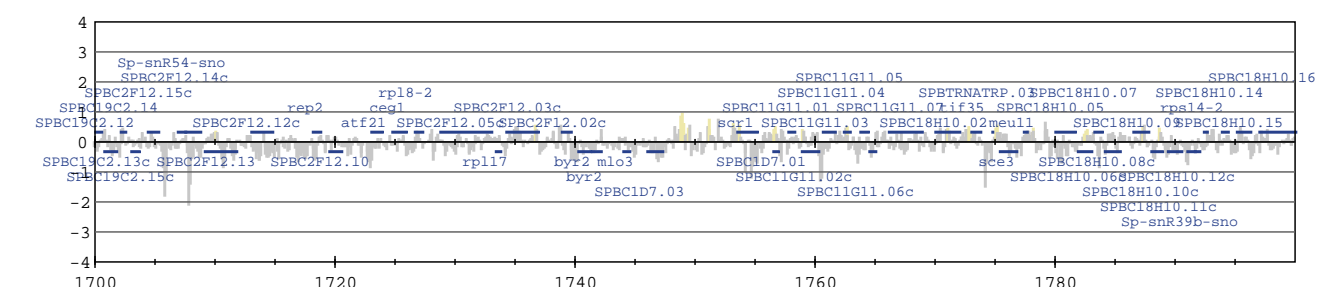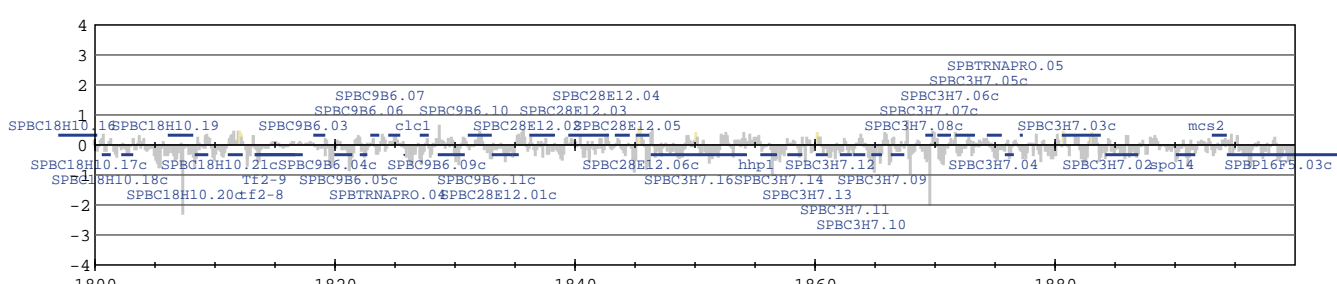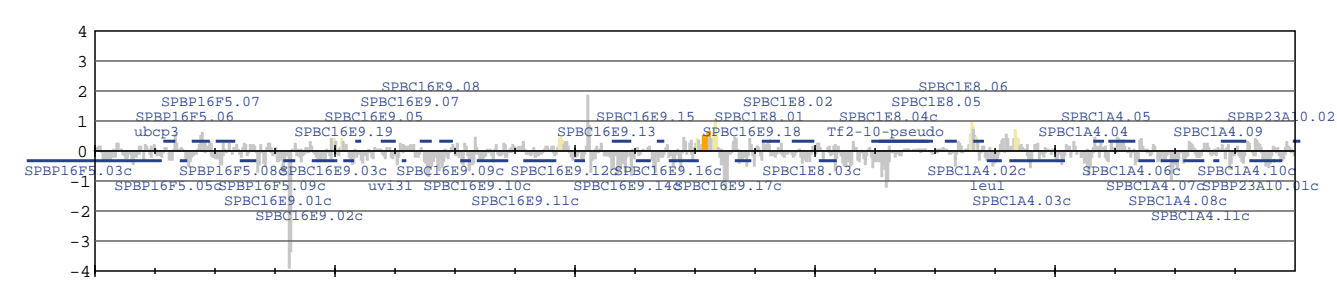





chromosome II

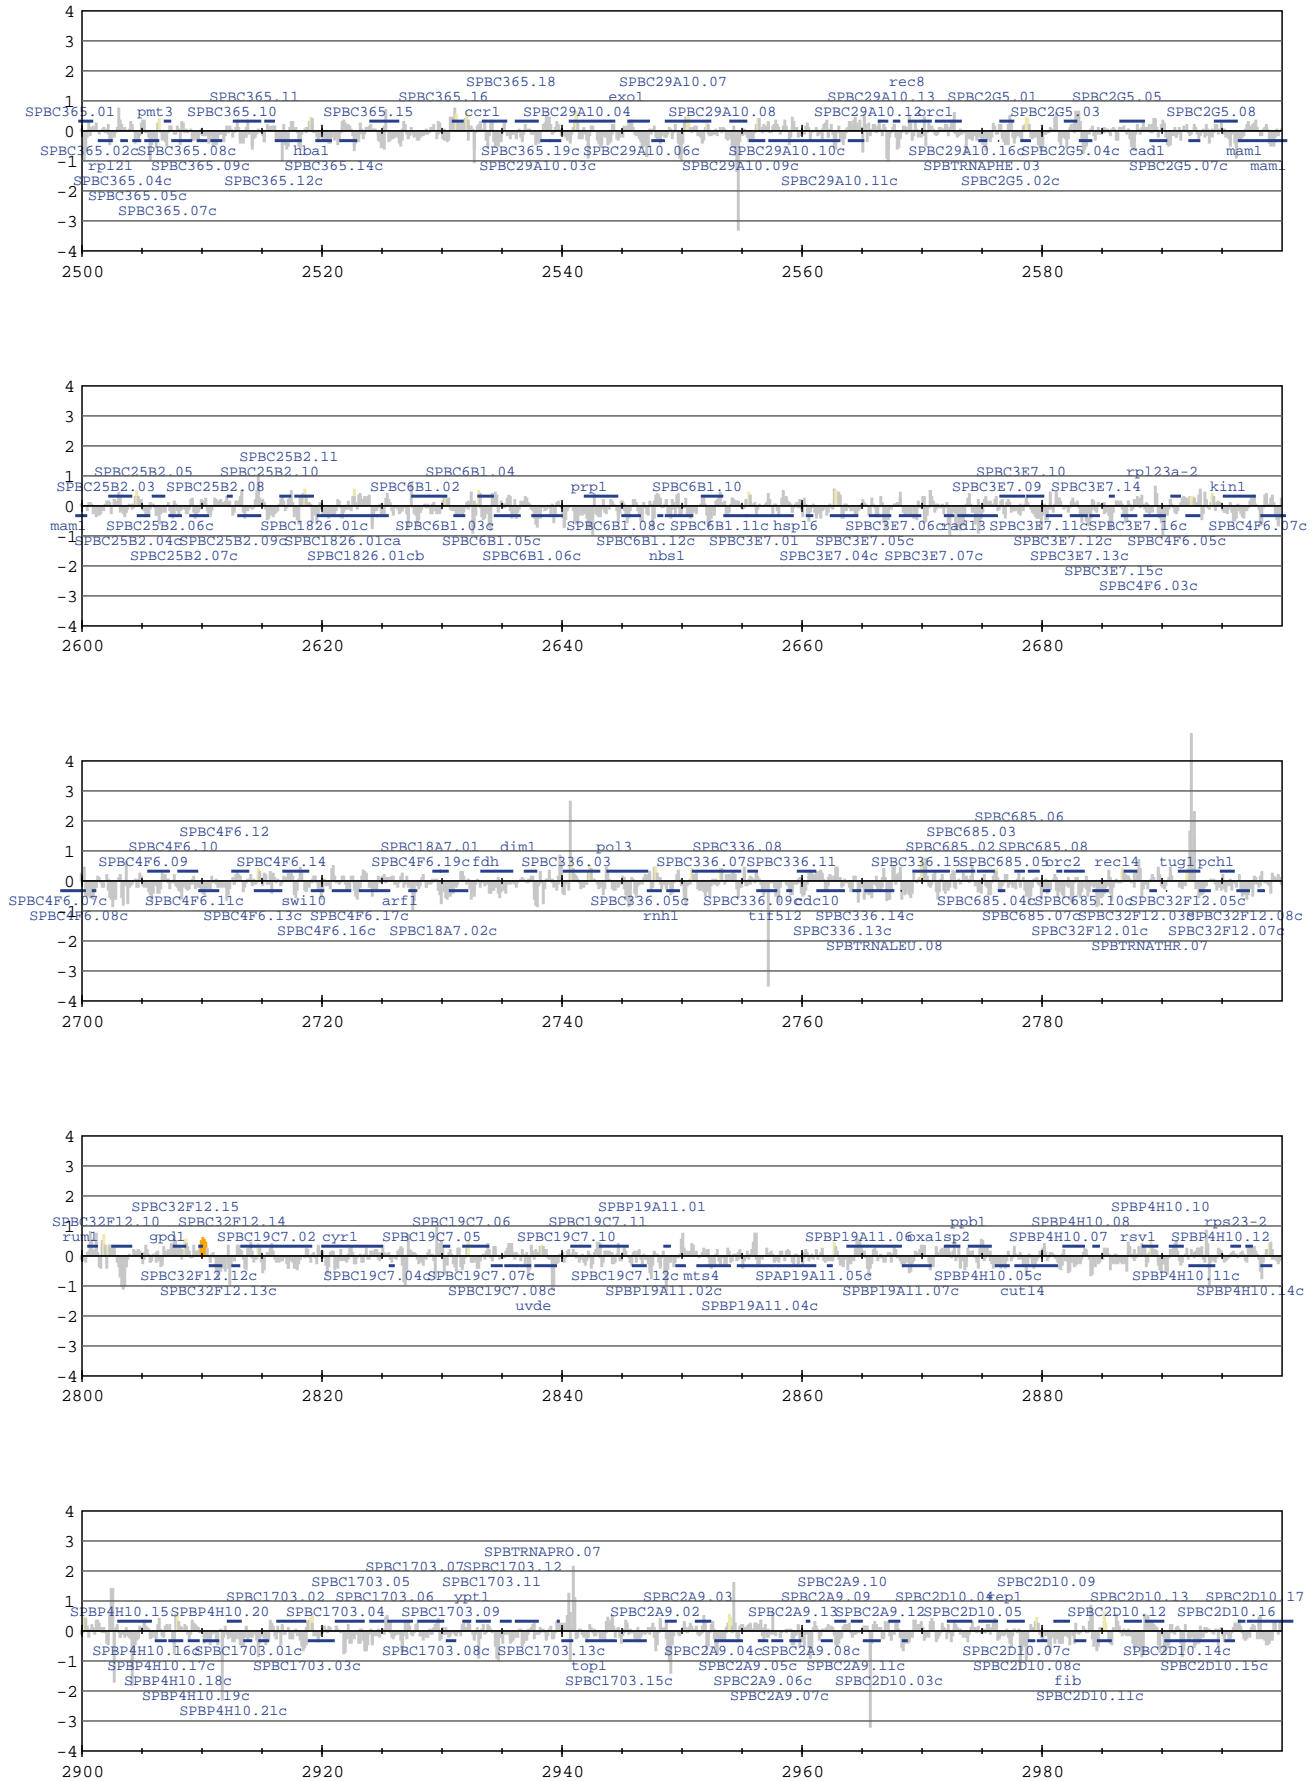

chromosome II

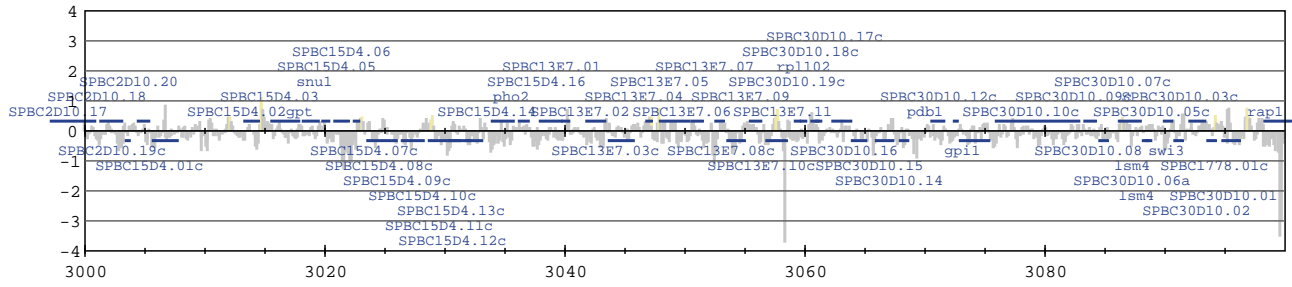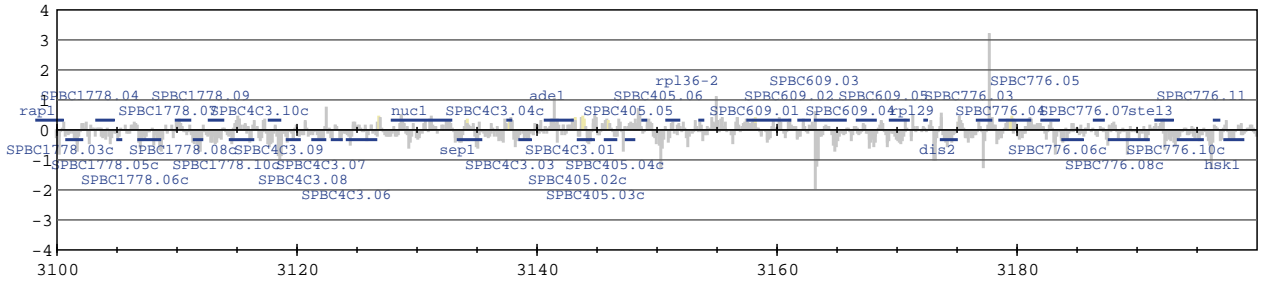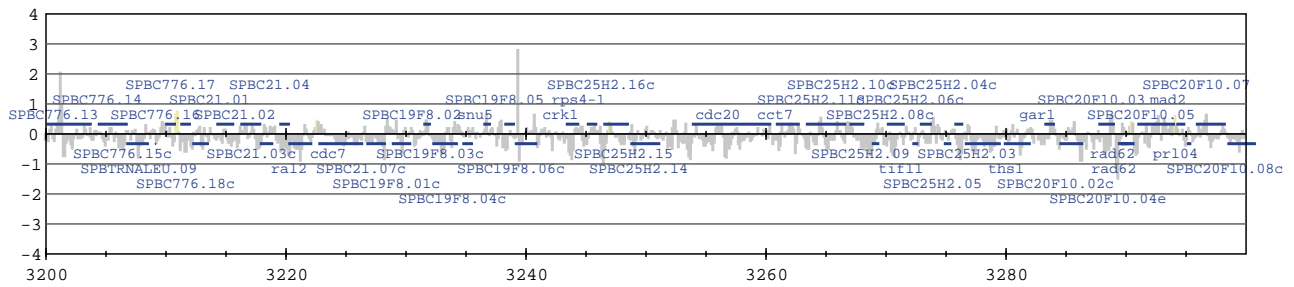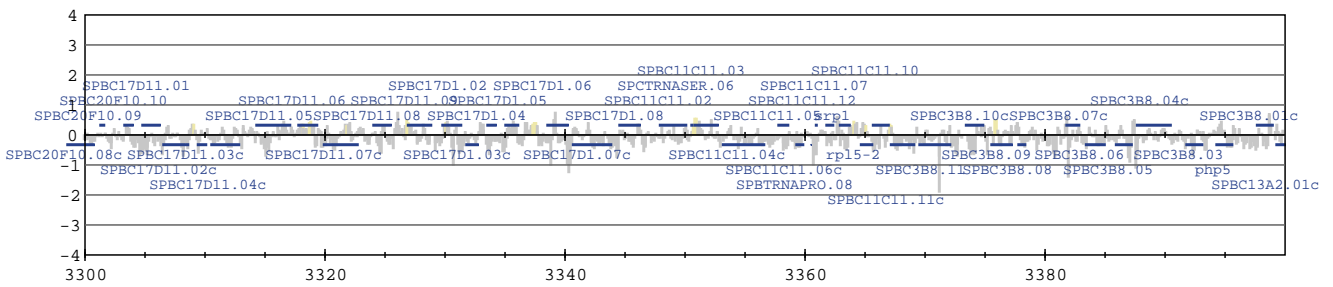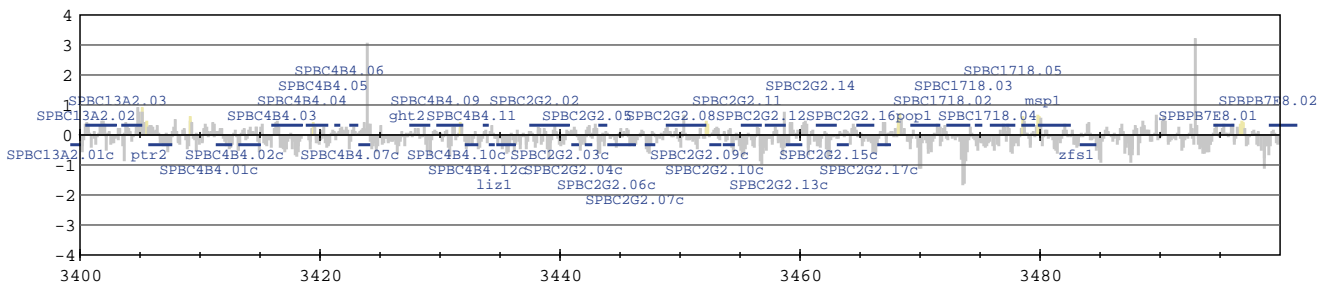

chromosome II

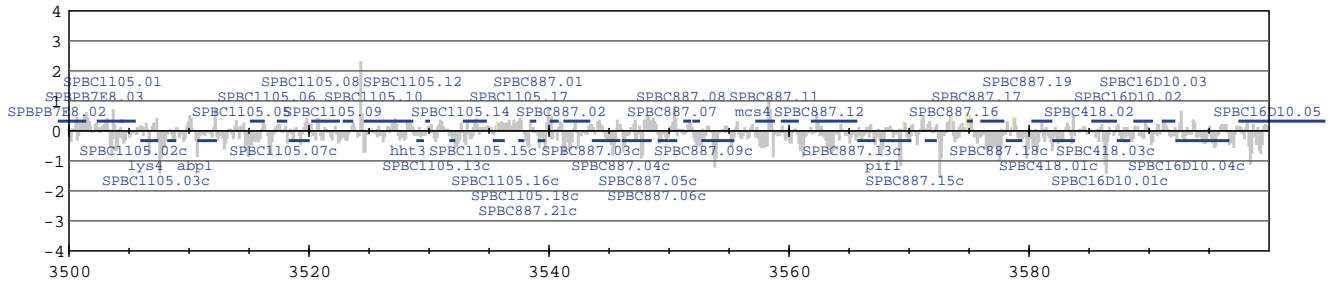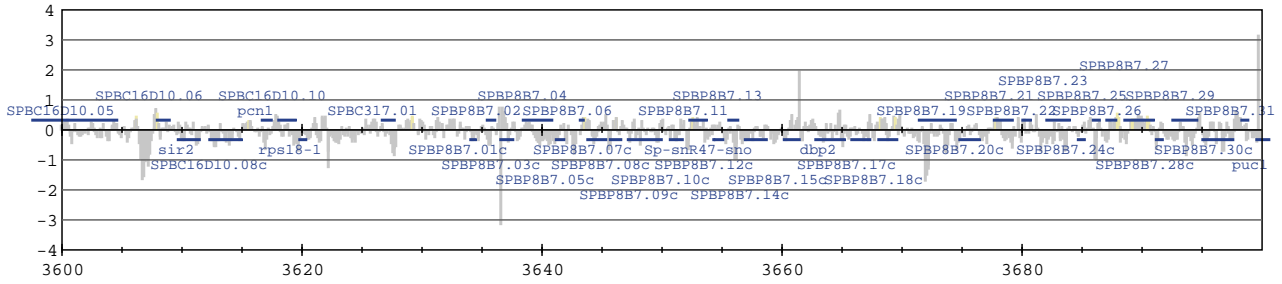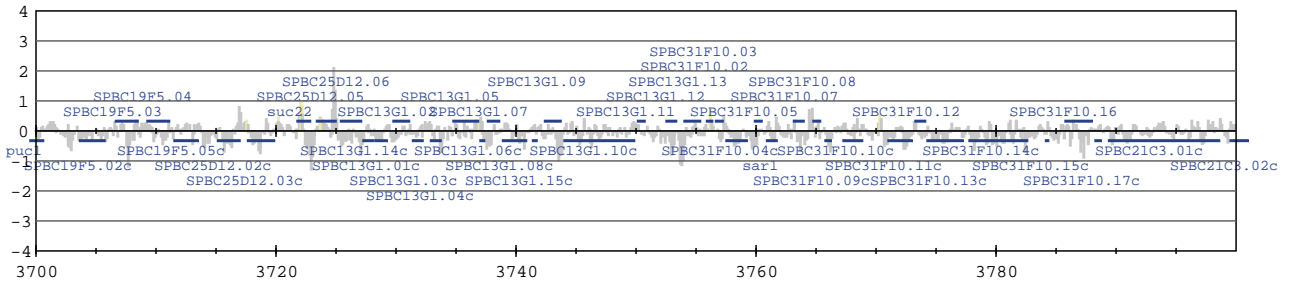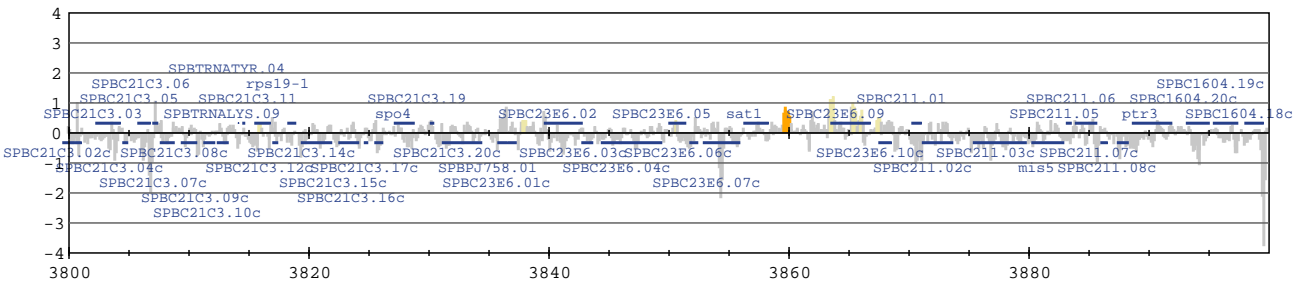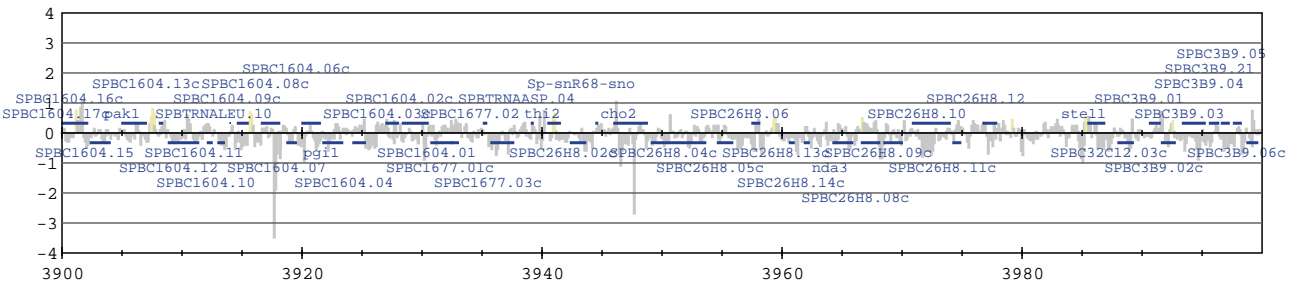

chromosome II

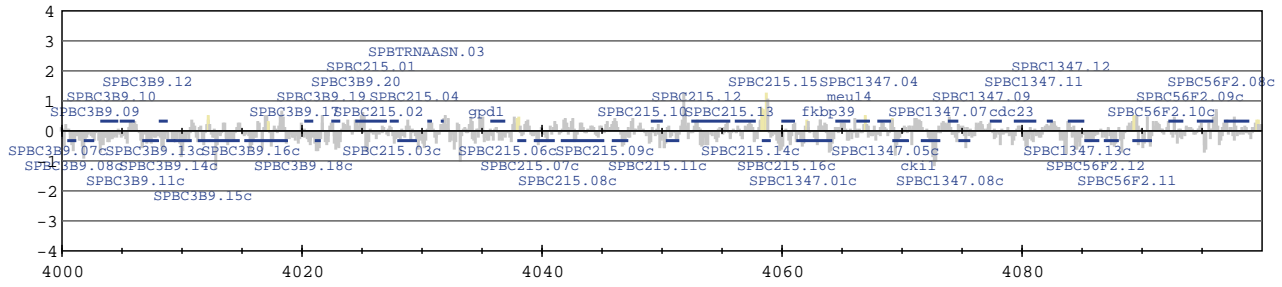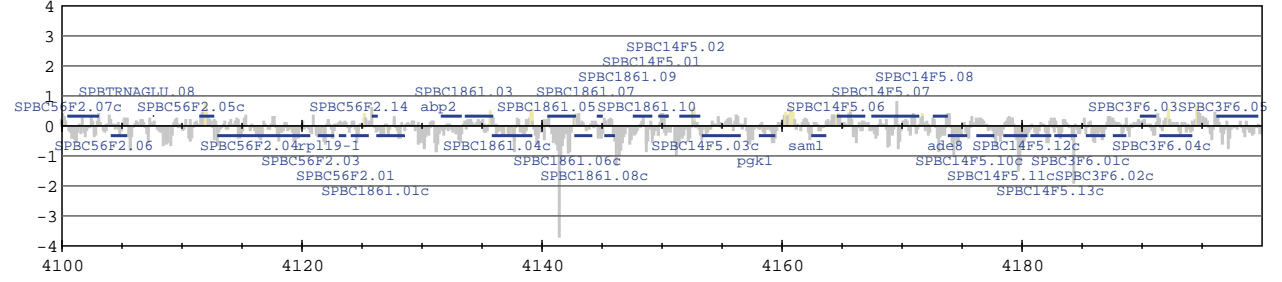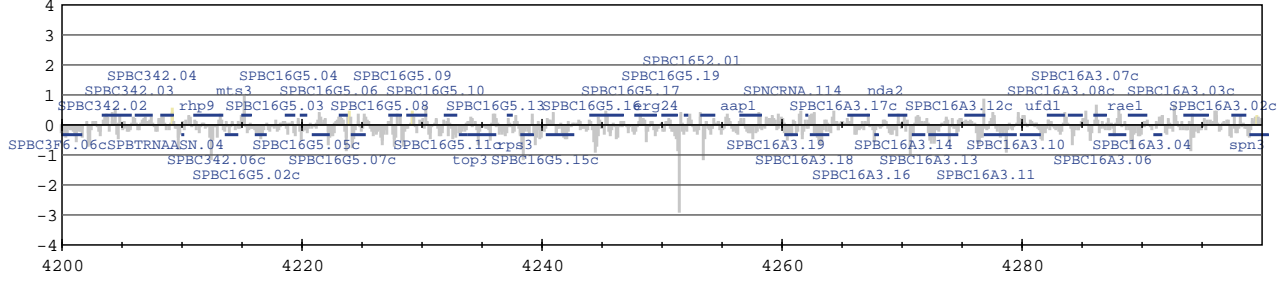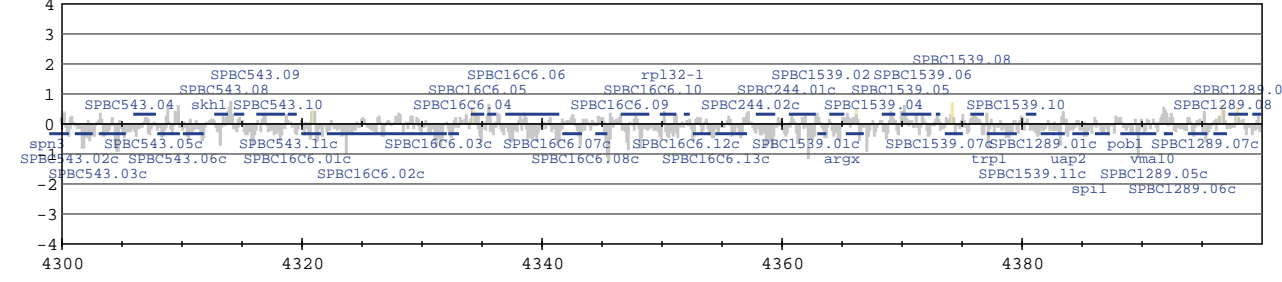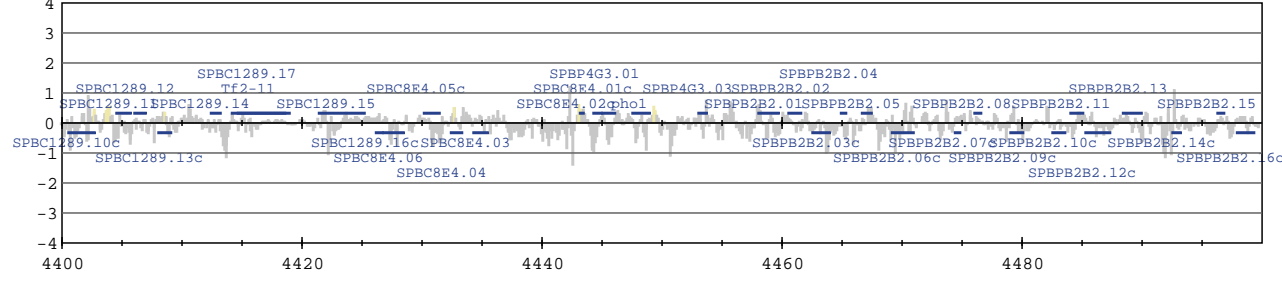

chromosome II

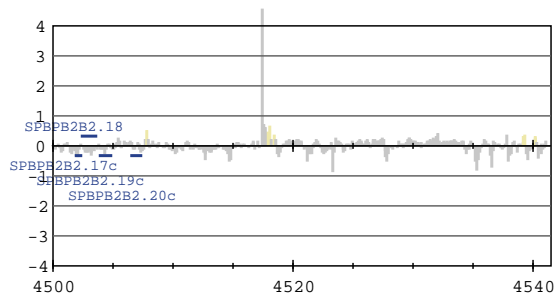

chromosome III

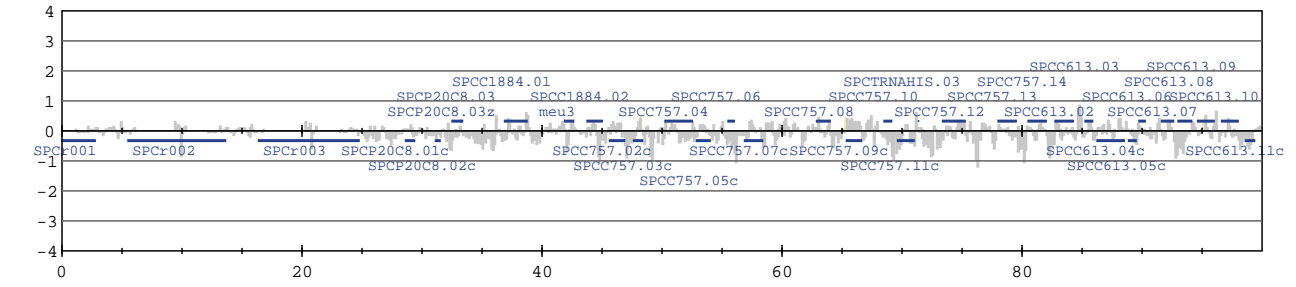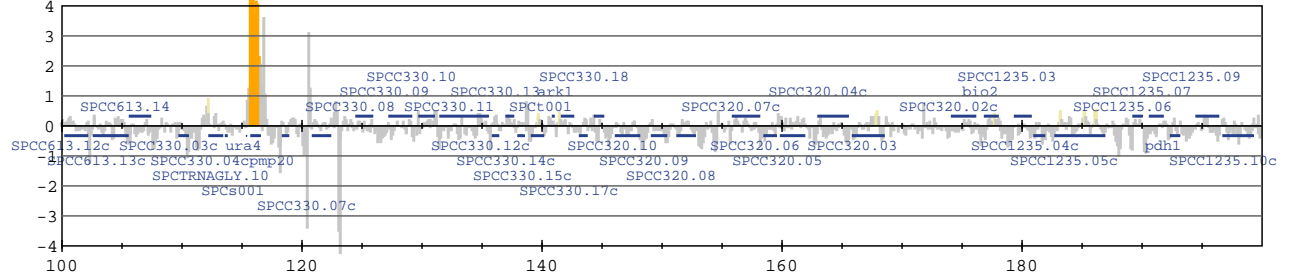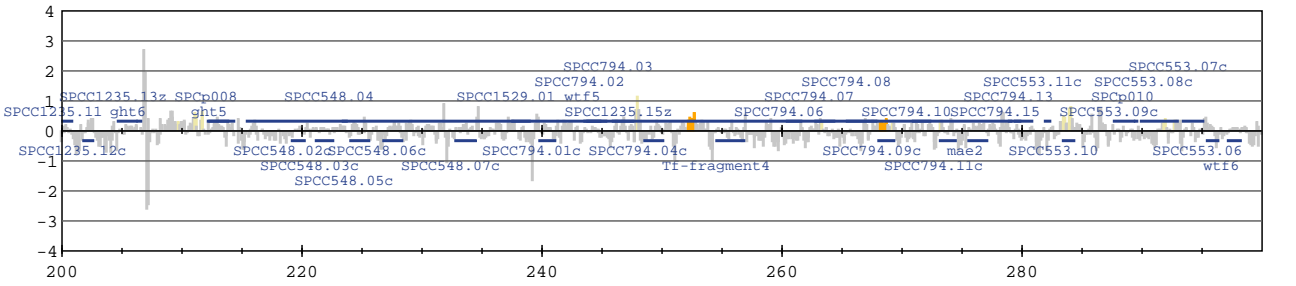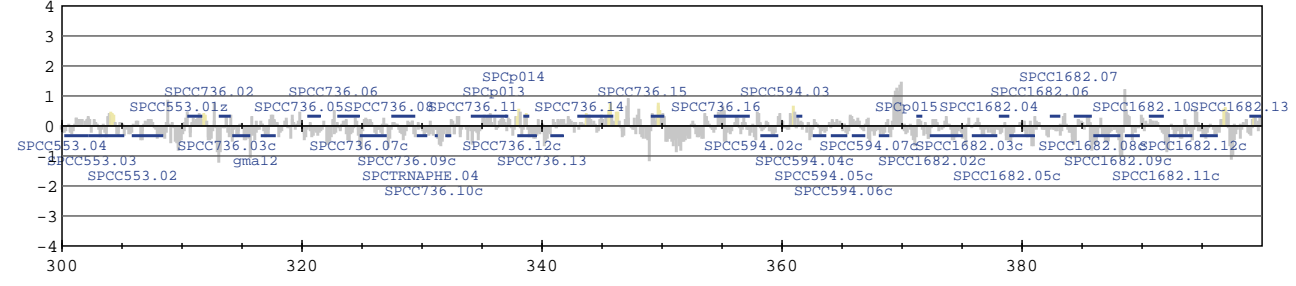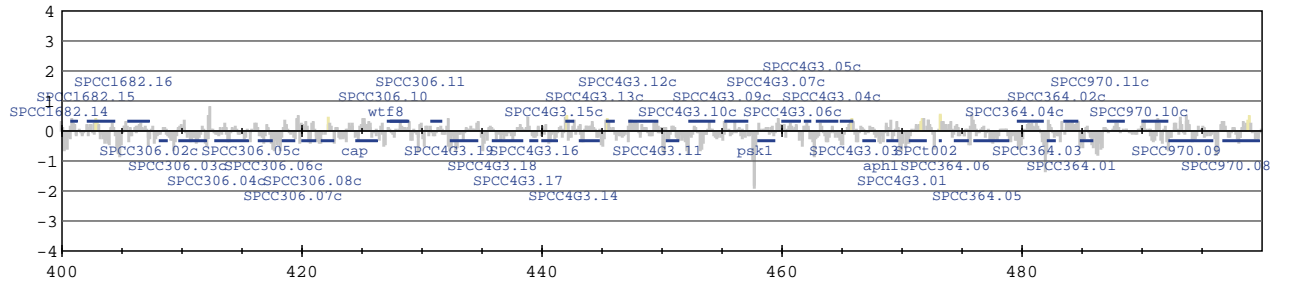

chromosome III

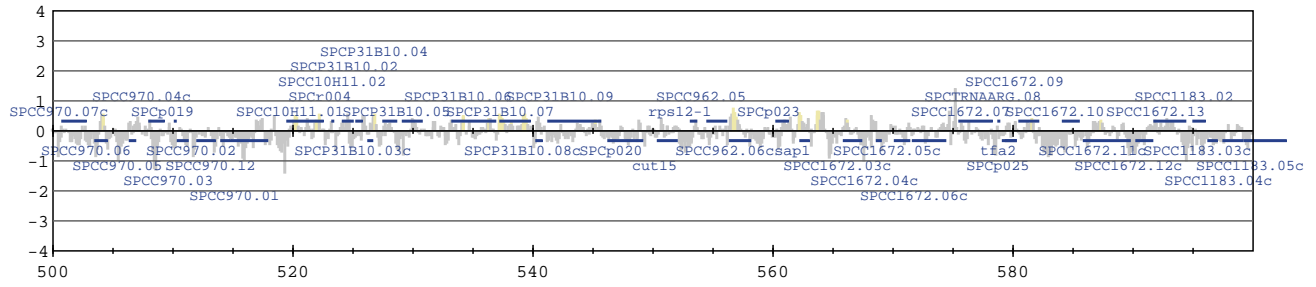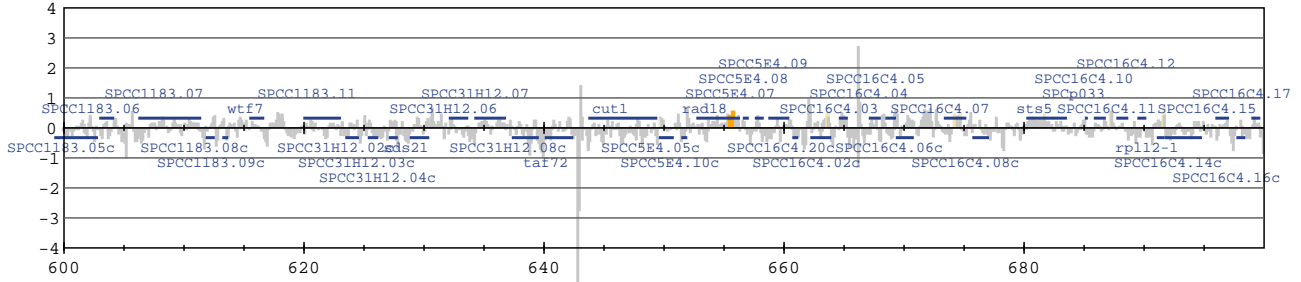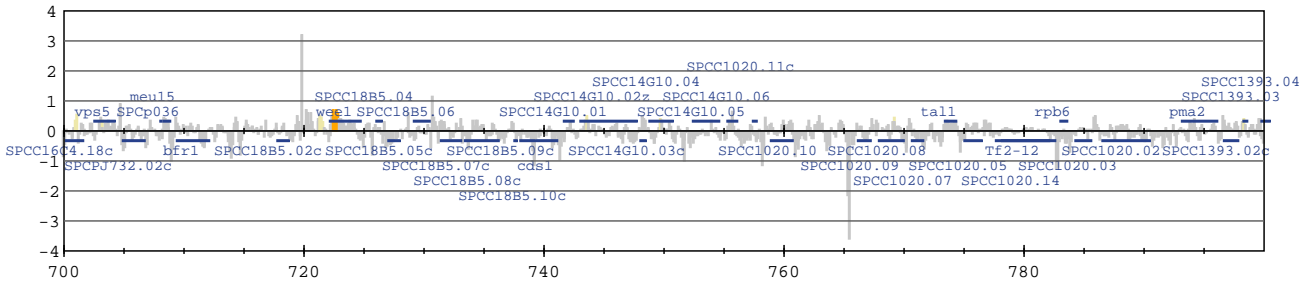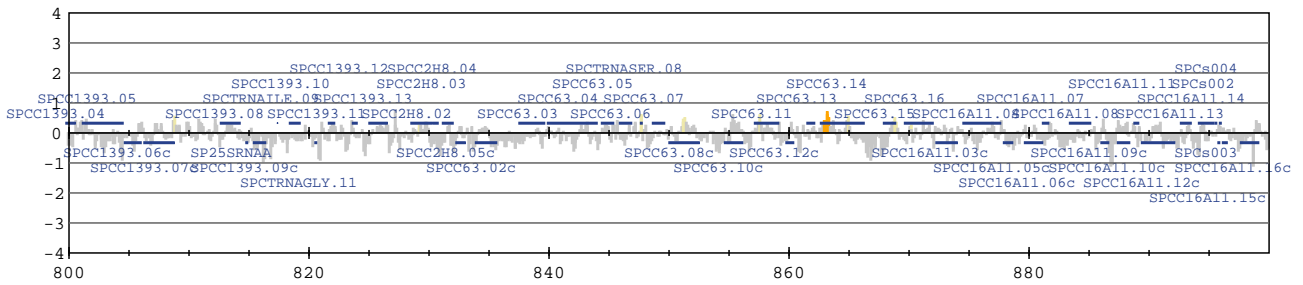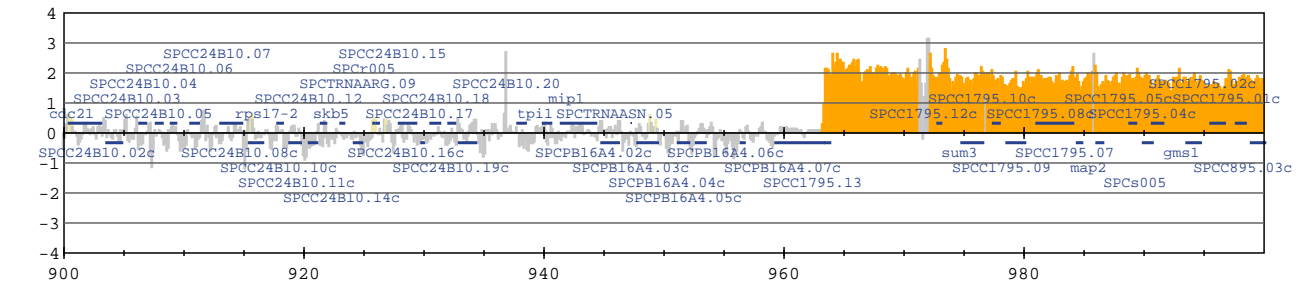



chromosome III

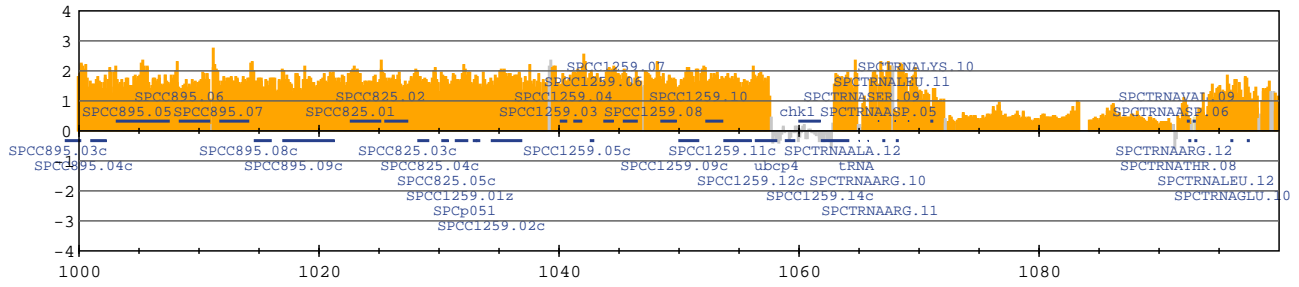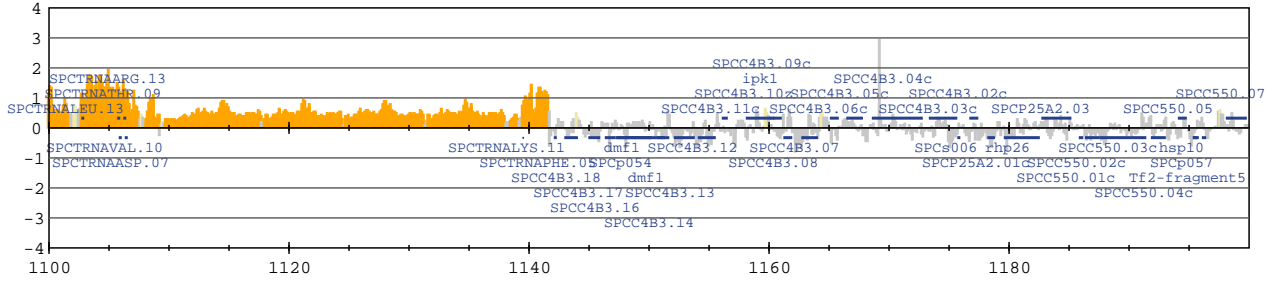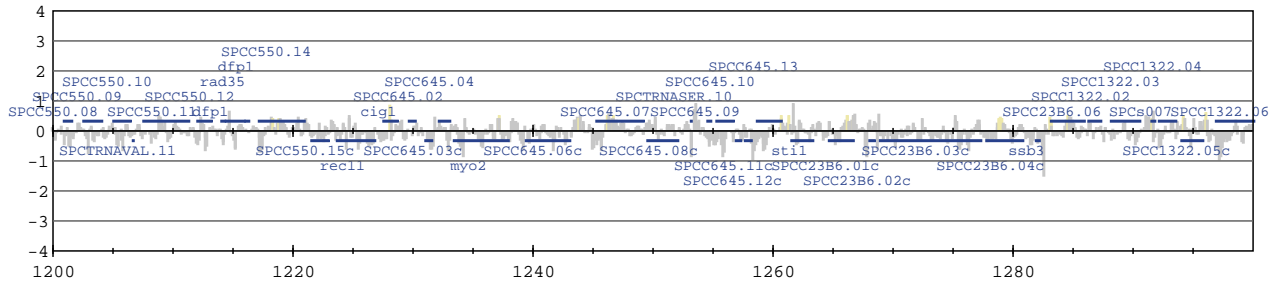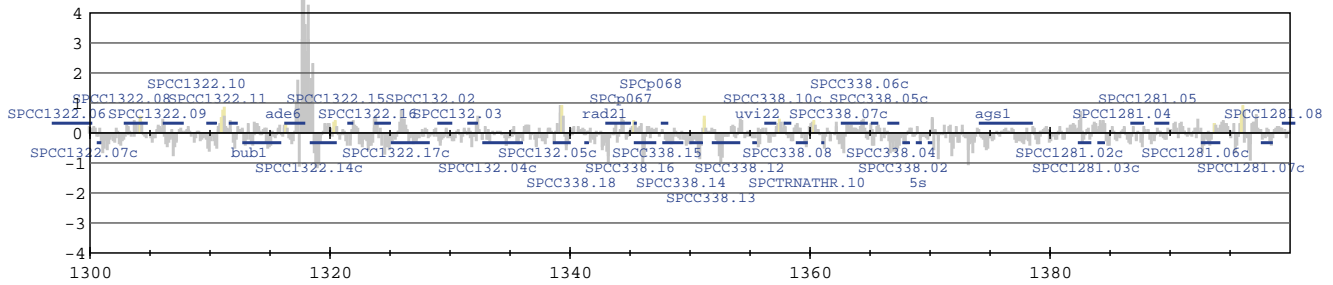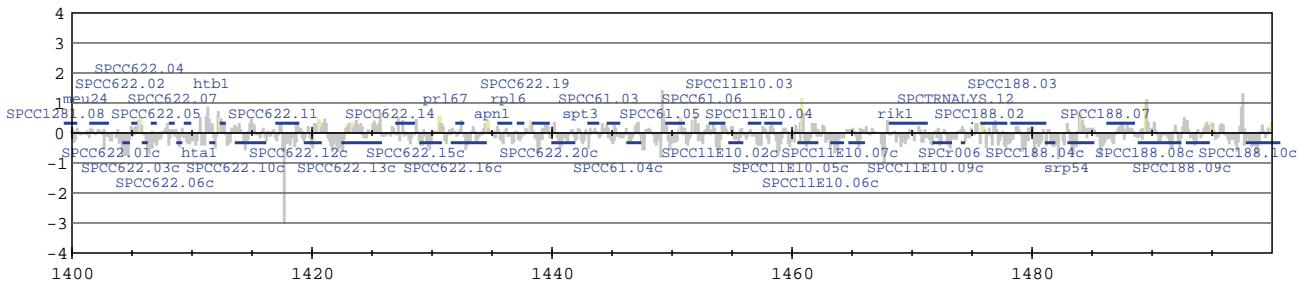



chromosome III

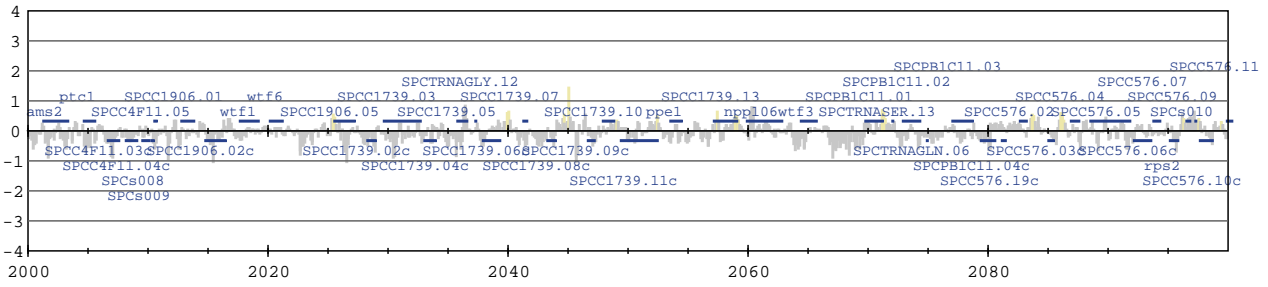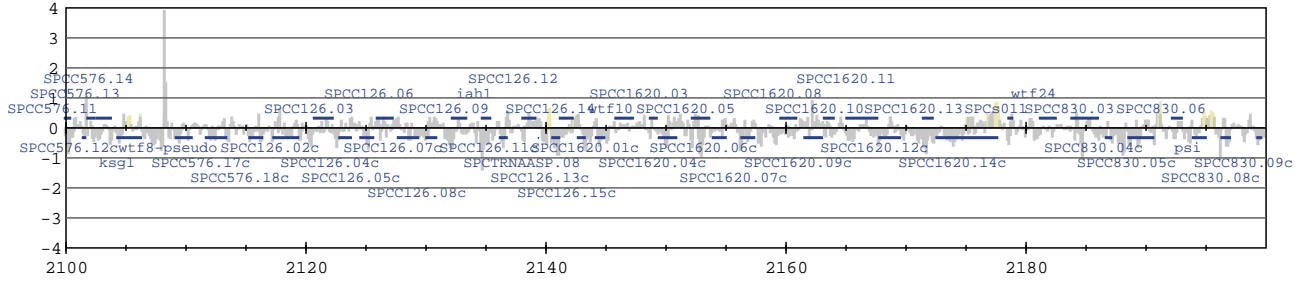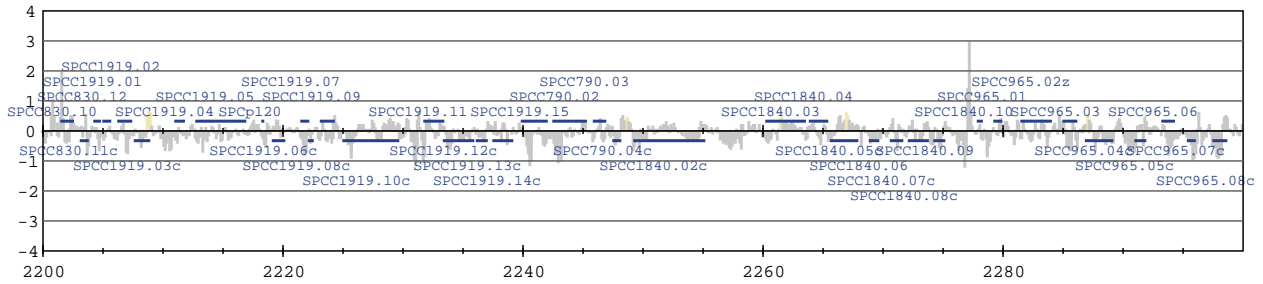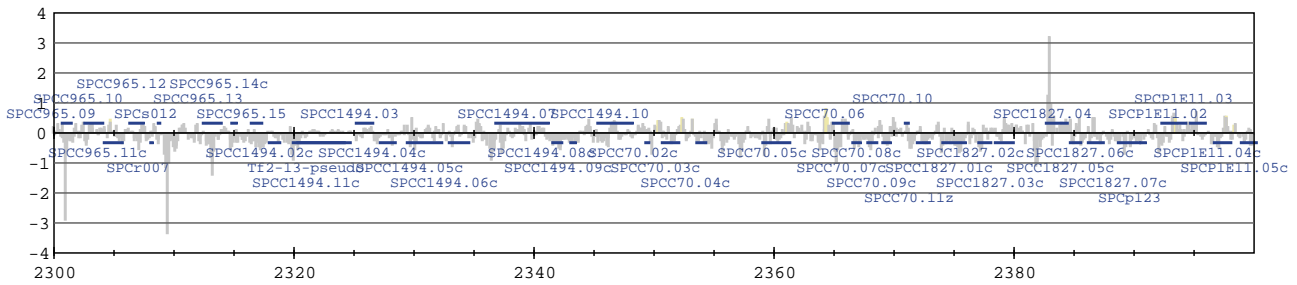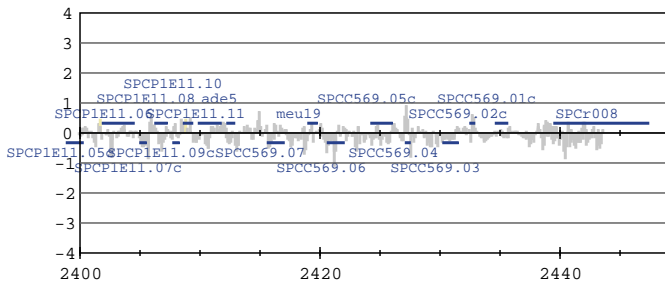

Supplement: emboj2008215s2.pdf [file emboj2008215s2.pdf]
